# Supplementary material for: CsPbBr3 perovskite quantum dots as a visible light photocatalyst for cyclisation of diamines and amino alcohols: an efficient approach to synthesize imidazolidines, fused-imidazolidines and oxazolidines
Source: Royal Society of Chemistry journal article supplement (doi:10.1039/d2cy00799a), 2022-01-01
Supplement: d2cy00799a1.pdf [file d2cy00799a1.pdf]

## *Supporting Information*

### **CsPbBr<sub>3</sub> Perovskite Quantum Dots as Visible Light Photocatalyst for cyclisation of diamines and amino alcohols: An efficient approach to synthesize Imidazolidines, fused-imidazolidines, and Oxazolidines**

Bikram Gurung, Sajjan Pradhan, Debesh Sharma, Deshaj Bhujel, Siddhant Basel, Shivanand Chettri, Saragmani Rasaily, Anand Pariyar and Sudarsan Tamang\*

Department of Chemistry, School of Physical Sciences, Sikkim University, Sikkim 737102, India.

\*[stamang@cus.ac.in](mailto:stamang@cus.ac.in)

#### **Table of Contents**

| Sl. No. | Contents                                                                                                                | Pg. No. |
|---------|-------------------------------------------------------------------------------------------------------------------------|---------|
| 1.      | General Information                                                                                                     | S2      |
| 2.      | Characterization Methods                                                                                                | S2-S4   |
| 3.      | Experimental Details                                                                                                    | S4-S5   |
| 4.      | Temperature-dependent size-tunable study                                                                                | S5      |
| 5.      | Photoluminescence quantum yield (PLQY) determination                                                                    | S6-S7   |
| 6.      | Characterization of <b>QDs</b>                                                                                          | S8-S9   |
| 7.      | Comparative study of photocatalytic performance of <b>QDs</b> with conventional prepared CsPbBr <sub>3</sub> <b>QDs</b> | S9      |
| 8.      | Catalyst recyclability test                                                                                             | S10-S12 |
| 9.      | Determination of catalyst digestion                                                                                     | S13     |
| 10.     | Calculation of Turnover Number (TON)                                                                                    | S14     |
| 11.     | Procedure for gram-scale synthesis                                                                                      | S14     |
| 12.     | Copies of cyclic voltammogram (CV) spectra                                                                              | S15-S16 |
| 13.     | Photoluminescence quenching experiment                                                                                  | S17     |
| 14.     | Superoxide radical anion (O <sub>2</sub> <sup>•-</sup> ) detection study                                                | S18-S19 |
| 15.     | Intermediate trapping experiment                                                                                        | S19-S20 |
| 16.     | H <sub>2</sub> O <sub>2</sub> detection study                                                                           | S20-S21 |
| 17.     | Computational Study                                                                                                     | S21-S39 |
| 18.     | Apparent Quantum Efficiency (AQE) calculation                                                                           | S40-S43 |

|     |                                                                          |         |
|-----|--------------------------------------------------------------------------|---------|
| 19. | NMR spectral data of the products                                        | S43-S50 |
| 20. | Copies of HPLC chromatogram of products                                  | S51-S53 |
| 21. | Copies of <sup>1</sup> H-NMR and <sup>13</sup> C-NMR spectra of products | S54-S72 |
| 22. | Single Crystal Data of <b>2j</b>                                         | S73     |
| 23. | References                                                               | S74-S76 |

## 1. General Information

**Materials and general considerations:** Cesium carbonate (Cs<sub>2</sub>CO<sub>3</sub>, 99.9%), lead acetate (Pb(OAc)<sub>2</sub>), oleic acid (OA, technical grade), 1-octadecene (ODE, technical grade), oleylamine (OLAM, technical grade), anhydrous toluene (99.8%), and anhydrous hexane (95%) were all purchased from Sigma-Aldrich. Dibromoisocyanuric acid (DBI, 97% ) was purchased from TCI. All of the mentioned chemical reagents were used as received without further purification. The substrates such as 1,2-diamine (**1a-i**)<sup>1</sup>, (**3a-c**)<sup>2</sup>, and 1,2-amino alcohol (**5a-c**)<sup>3</sup> for photocatalytic organic transformation were prepared by following earlier reports. Visualizations of the spots were done under a UV lamp or by blowing an I<sub>2</sub> stain. For purification of substrate and products, column chromatographic technique was performed using Silica gel 60–120 mesh size as eluate and the combination of ethyl acetate and petroleum ether as the eluent. Unless otherwise mentioned, all the reactions were performed in a 4 mL homeopathic vial in a pen atmosphere under the blue light considering appropriate solvents.

## 2. Characterization Methods

**Nuclear magnetic resonance (NMR):** <sup>1</sup>H NMR and <sup>13</sup>C NMR spectra were recorded on a Bruker ASCEND™ (400 MHz) spectrometer in CDCl<sub>3</sub> solvent. Multiplicity was indicated as follows: s (singlet), d (doublet), t (triplet), q (quartet), dd (doublet of doublet) and m (multiplet).

**Blue light LED:** A Kessil 160WE Tuna blue LED Light (40W) purchased from the Kessil company was used as the source of blue light. The maximum absorption wavelength and the illumination intensity of the blue LED Light are 461 nm and 0.363mW/cm<sup>2</sup> at a distance of 100 cm respectively.

**Cyclic voltammetry (CV) measurement:** The electrochemical data were collected using a BASI INC, USA/EPSILON electrochemistry workstation. The working electrode (Pt disc electrode, 1.6 mm diameter), the counter electrode (Pt wire) and the reference electrode (Ag/AgCl electrode) were used to construct a three-electrode cell employing tetrabutylammonium perchlorate (TBAP, 0.1 M) as the supporting electrolyte. Before the experiment, solution was purged with N<sub>2</sub> for 10 min. Experimental conditions: scan range from 1.5V to -1.5V, scan rate of 50 mV s<sup>-1</sup>. The potentials obtained from CV experiments were converted to the HOMO/LUMO levels assuming the potential of ferrocene/ferrocenium (Fc/Fc<sup>+</sup>) redox pair to be -4.80 eV as a reference from the vacuum level. The formal redox potential of Fc/Fc<sup>+</sup> couple (reference) vs Ag/AgCl in acetonitrile and 1:4 v/v mixture of acetonitrile and toluene using 0.1 M TBAP as supporting electrolyte were 0.42 and 0.48 V respectively. The energy levels (eV) were estimated from  $-E_{\text{HOMO/LUMO}} = E^{\text{redox}}$  (vs Ag/AgCl) + 4.44 eV =  $E^{\text{redox}}$  (vs Fc/Fc<sup>+</sup>) + 4.8 eV.<sup>4-6</sup> For model substrates,  $E_{\text{HOMO}} = [-e(E_{\text{ox}} - 0.42 + 4.8)]$  eV and for photocatalyst,  $E_{\text{HOMO}} = [-e(E_{\text{ox}} - 0.48 + 4.8)]$  eV;  $E_{\text{LUMO}} = [-e(E_{\text{red}} - 0.48 + 4.8)]$  eV.

**UV-Vis spectrophotometer:** The UV-Visible absorption spectra were collected using Perkin Elmer spectrophotometer and Agilent Technologies Cary 100 UV-vis.

**Vis-NIR spectrofluorometer:** The PL spectra of CsPbBr<sub>3</sub> NCs were collected using a HORIBA Scientific spectrophotometer (Model: PTI-QM 510). A Fluorometer with XM- Xenon coupled monochromatic source were used to determine the quantum yield of the photochemical reaction.

**Transmission electron microscopy (TEM):** TEM images were taken in the JEOL-JEM-2100 Plus electron microscope. HRTEM images were obtained using a 200 kV electron source. Samples were prepared by drop-casting of nanocrystal solution in hexane on carbon-coated copper grid purchased from EMS, the grids were kept overnight in a vacuum desiccator. The average particle size was measured using 150 particles. The lattice plane was obtained from lattice fringes. Image J software was used for calculations.

**Fourier Transform Infrared Spectroscopy (FTIR):** FTIR spectra were obtained using Bruker ALPHA E, 200396.

**X-ray Diffractometer Analysis:** The purified QDs in hexane were drop-casted on a clean and dry glass slide. Powder X-ray Diffraction (PXRD) analysis of prepared sample was run under the Pananalytical X-Ray diffractometer using Cu K $\alpha$  ( $\lambda = 1.54 \text{ \AA}$ ) as the incident radiation (40 kV and 30 mA). Single-crystal X-Ray diffraction (SCXRD) intensity data were collected using Super Nova Agilent Technology, a single crystal diffractometer.

**Inductively coupled plasma-mass-spectrometry (ICP-MS):** The dissolved QDs in reaction solvent was diluted with millipore water in tube. ICP-MS technique for to determine the dissolved ions concentration were performed under Agilent 7800 ICP-MS.

**X-ray Photoelectron Spectroscopy (XPS):** XPS samples containing halides ions were prepared on gold foil and placed inside the petri-disc. It was degassed in a vacuum-oven at room temperature under pressure of 700 mm Hg. XPS spectra were obtained using Thermo-Scientific NEXSA spectrometer with Al K $\alpha$  (1486.7 eV) X-ray source. Percentage atomic concentration (A%) of Cs, Pb, Br and N were determined from the survey data using CASA XPS. The software computes A% from the peak area after correcting the corresponding sensitivity factors. Relative sensitivity factors (RSF) used for Pb 4f, Cs 3d and Br 3p are 22.74, 40.22 and 5.03 respectively.

### 3. Experimental Details

**Synthesis of CsPbBr<sub>3</sub> colloidal QDs:** Cs-oleate solution was prepared by dissolving 0.8125 g (2.5 mmol) of Cs<sub>2</sub>CO<sub>3</sub> in 20 mL ODE and 2.5 mL OA. The solution was degassed at room temperature (rt) for 15 min, followed by degassing at 120 °C under a vacuum until a clear solution was obtained. The solution was stored in N<sub>2</sub> atmosphere (in schlenk line) at 100 °C for further use.

0.0325 g (0.1 mmol) of lead acetate, 0.3 mL OA, 0.5 mL of OAm, 0.0834 g (0.3 mmol) of DBI and 4 mL of ODE were mixed and degassed under vacuum at RT for 30 min, followed by degassing under vacuum at 120 °C for 60 min. Subsequently, the temperature was increased to 200 °C under an inert (N<sub>2</sub>) atmosphere. To this solution, 0.4 mL of Cs-oleate solution was quickly injected. The reaction was quenched immediately by immersing the reaction flask in icebath. The green emitting colloidal solution was formed. The crude colloidal QDs were purified using

centrifugation to obtain powdered form of QDs. It was stored in N<sub>2</sub> atmosphere (in schlenk line) further use in photocatalysis.

**Purification:** To 4 mL of the freshly prepared QDs in ODE dry toluene was added [1:1 (v/v)] and centrifuged at 500 rotation per minute (rpm) for 2 minutes. The precipitate was discarded to remove unreacted DBI. The supernatant was further centrifuged at 6000 rpm for 10 min. The precipitate was collected and dried.

#### 4. Temperature-dependent size-tunability

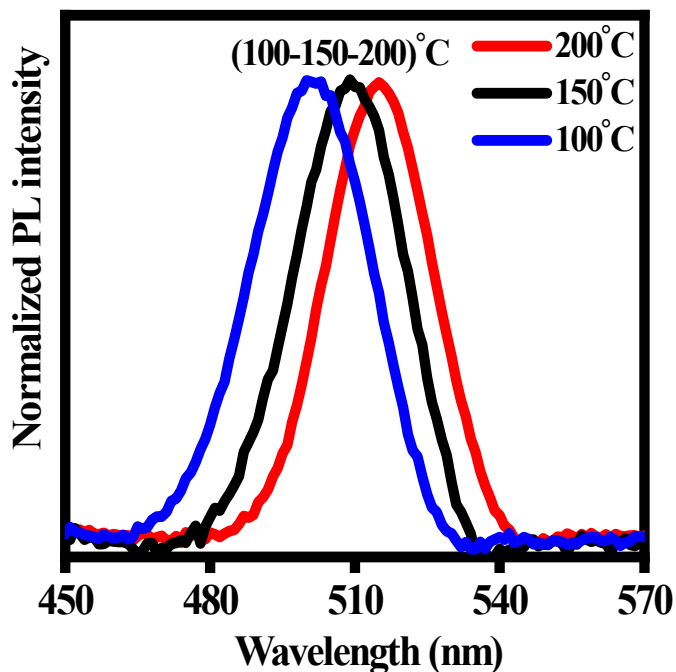

**Figure S1.** The size-tunable emission spectrum of QDs prepared at 100 °C (blue), 150 °C (red) and 200 °C (black) excited at 400 nm.

## 5. Photoluminescence Quantum Yield (PLQY) determination:

The relative PLQY of the QDs was determined using Rhodamine 6G as a reference compound.<sup>7</sup> The absorption and emission spectrum of both QDs and reference compound rhodamine 6G were determined at different concentrations (Figure S4). The slopes of emission intensity vs absorption (at excitation wavelength = 480 nm) were obtained and compared.

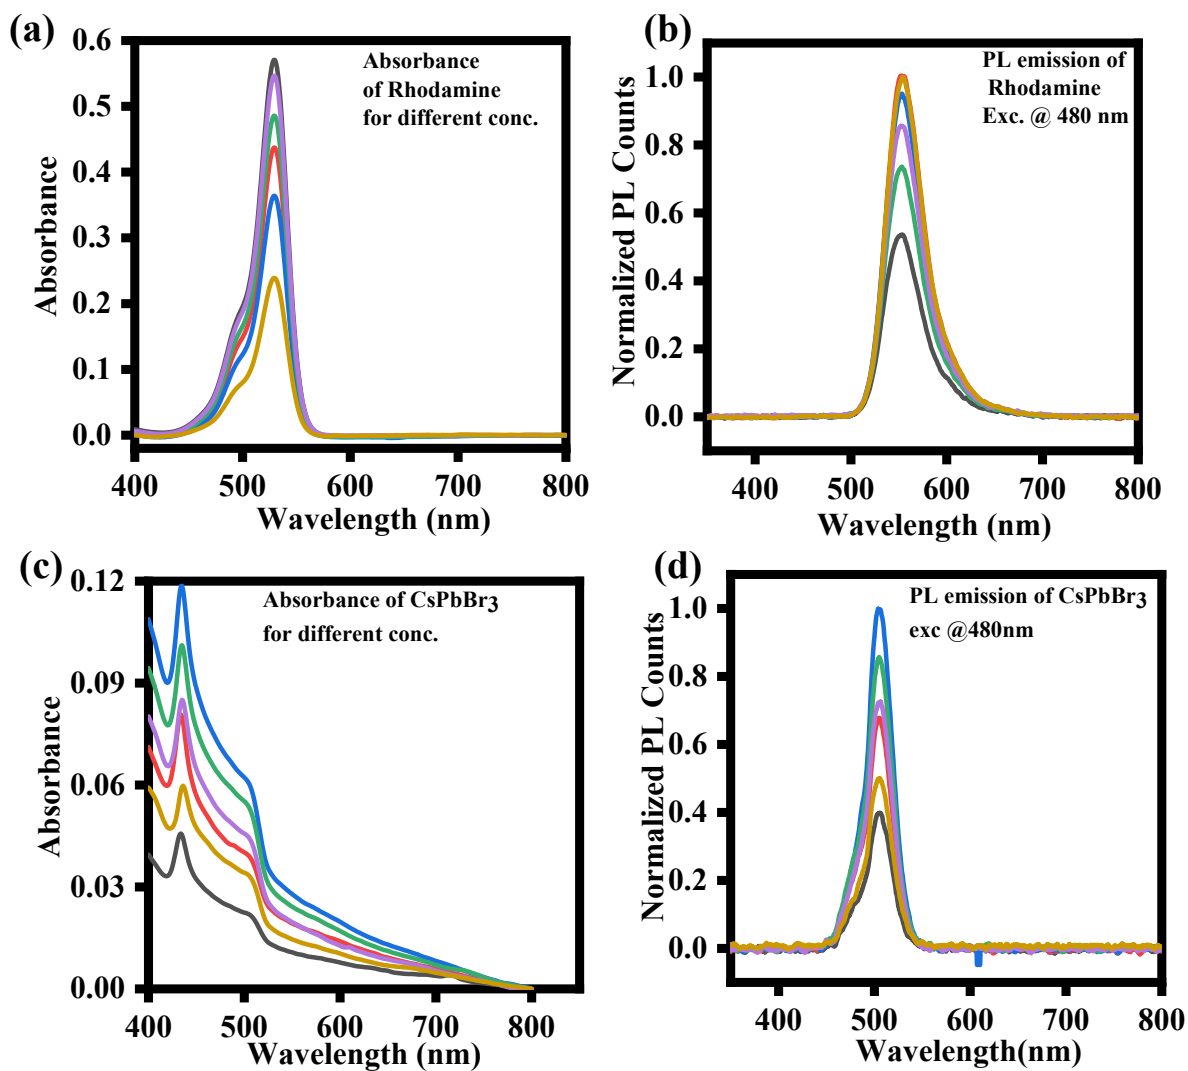

**Figure S2:** (a) UV-Visible spectra and (b) PL emission spectra of rhodamine 6G at different concentrations (excitation wavelength 480 nm). (c) UV-Visible spectra and (b) PL emission spectra of CsPbBr<sub>3</sub> QDs at different concentrations (excitation wavelength 480 nm).

PLQY was determined with the help of the following equation:

where,

$$\text{Relative quantum yield } (\phi) = \phi_{ref} \times \frac{m_{QDs}}{m_{ref}} \times \left(\frac{\eta_{QDs}}{\eta_{ref}}\right)^2$$

$\phi_{ref}$  = quantum yield of reference = 0.95 (in ethanol when excited at 480 nm)

$m_{QDs}$  = gradient of QDs

$m_{ref}$  = gradient of reference

$\eta_{QDs}$  = refractive index of solvent used to disperse QDs

$\eta_{ref}$  = refractive index of solvent used to dissolve reference compound

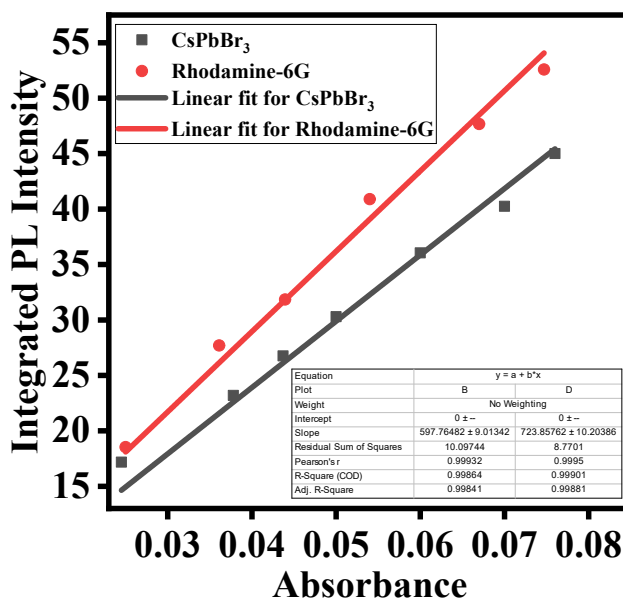

**Figure S3:** Linear fit of PL intensity vs absorbance (at 480 nm) of CsPbBr<sub>3</sub> QDs (black) and rhodamine 6G reference compound (red). The slopes of QDs and Rhodamine are 597.76 and 723.85 respectively.

## 6. Characterization of QDs:

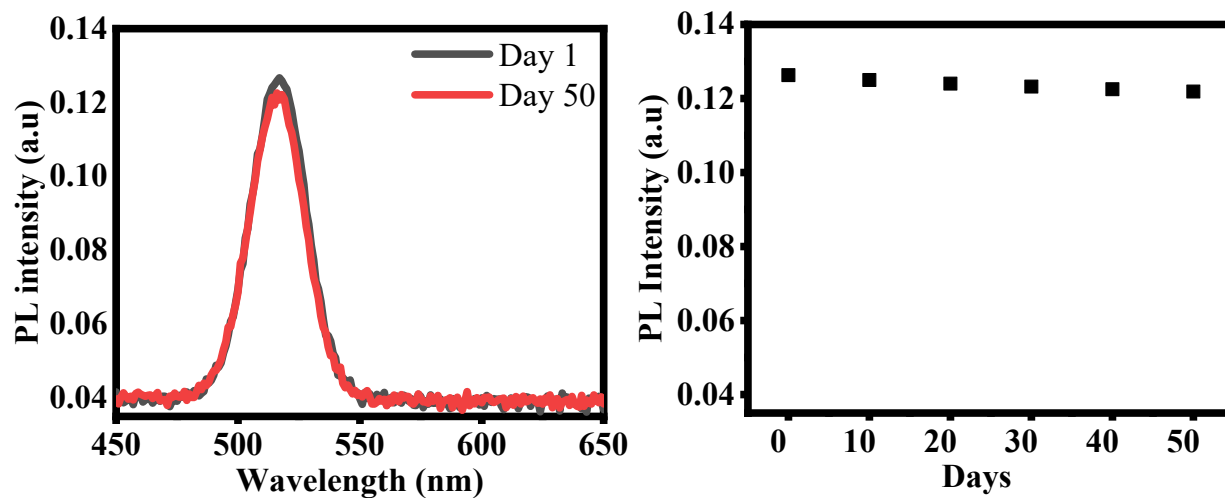

**Figure S4.** (a) The PL spectra of QDs dispersed in hexane for day 1 (black) and day 50 (red) (b) The temporal evolution of PL intensity of the QDs over 50 days.

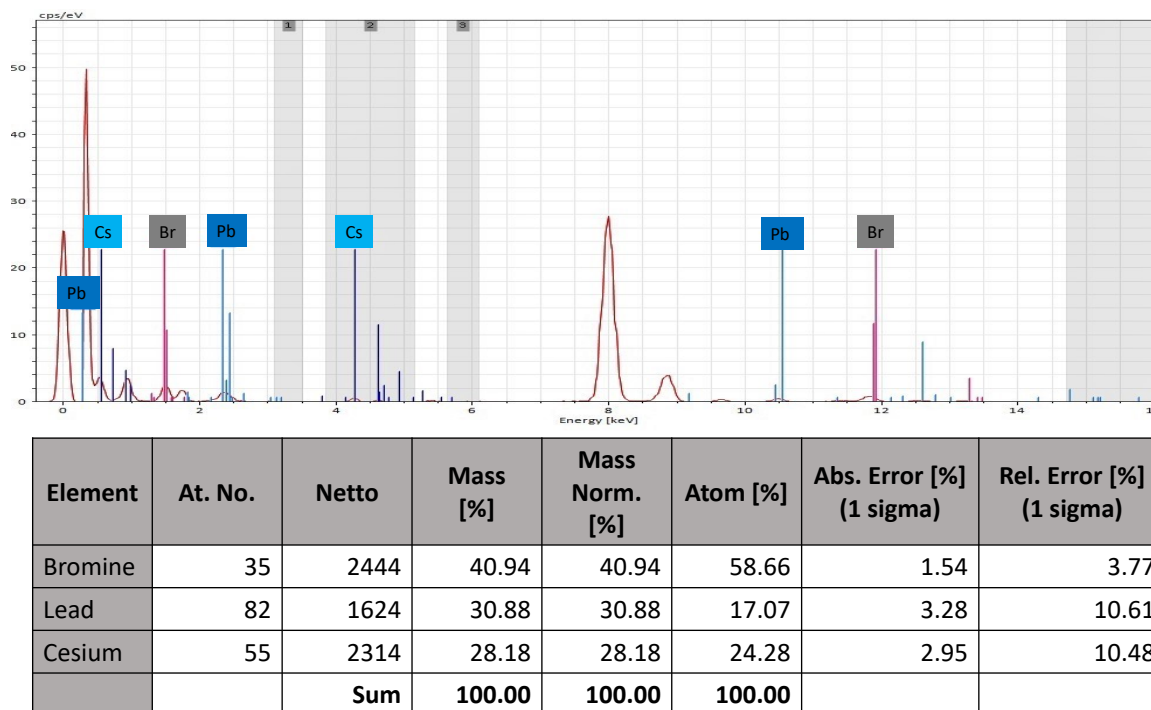

**Figure S5.** EDX spectrum of CsPbBr<sub>3</sub> QDs.



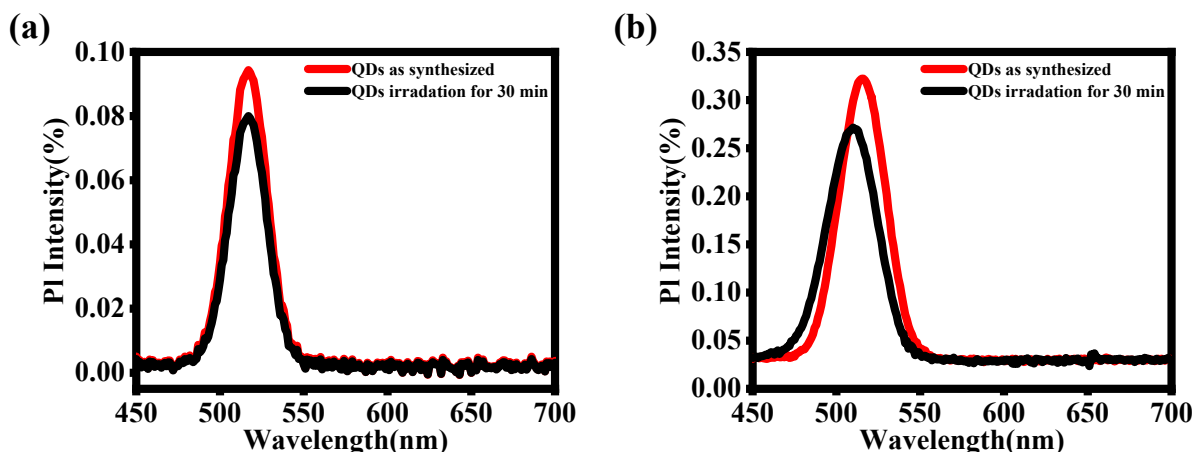

**Figure S6.** (a) PL spectra of QDs in DCE before (black) and after blue LED irradiation (red) for 30 min. (b) PL spectra of QDs in DCM before (black) and after blue LED irradiation (red) for 30 min.

**7. Comparative study of photocatalytic performance of QDs with conventionally prepared CsPbBr<sub>3</sub> QDs:**

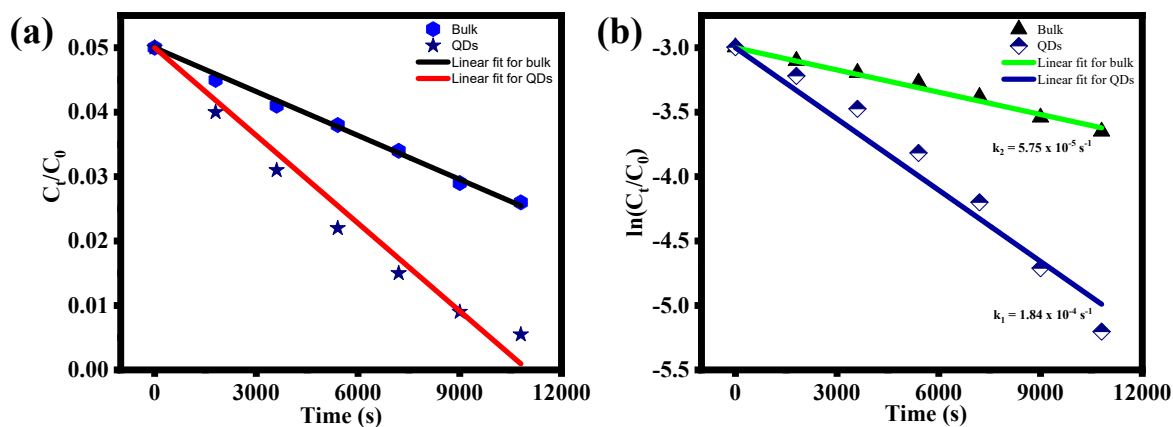

**Figure S7:** (a) A linear fit plot of  $C_t/C_0$  versus reaction time (s) using photocatalyst QDs (red line) and conventionally prepared perovskites QDs (black line). (b) Rate constants of QDs ( $k_1 = 1.84 \times 10^{-4} \text{ s}^{-1}$ ) and conventionally prepared perovskites QDs ( $k_2 = 5.75 \times 10^{-5} \text{ s}^{-1}$ ) catalyzed  $\text{sp}^3$  C-H functionalization of **3a** obtained through a plot of  $\ln(C_t/C_0)$  versus time.

## 8. Catalyst recyclability test

The catalyst recyclability test was performed following the reported literature protocol.<sup>8</sup> In a 4 mL glass vial, QDs (1 mg), **3a** (0.1 mmol) and 3 mL 1,2-dichloroethane (DCE) were mixed together. The mixture was irradiated with the blue LED for 3 h. The distance between the LED source and the vial was 6 cm. The product yield was calculated from <sup>1</sup>H-NMR using trimethoxybenzene as an internal standard. The yield of the corresponding C-H functionalized product **4a** for the 1<sup>st</sup> cycle was 89%. For the 2<sup>nd</sup> cycle, 0.1 mmol of **3a** was added into the same glass vial (without adding extra catalyst) and irradiated with the blue light for another 3 h. The overall yield for the 2<sup>nd</sup> cycle was 82%. The above step was repeated for the 3<sup>rd</sup> (yield 69%) and 4<sup>th</sup> cycle (yield: 66%)

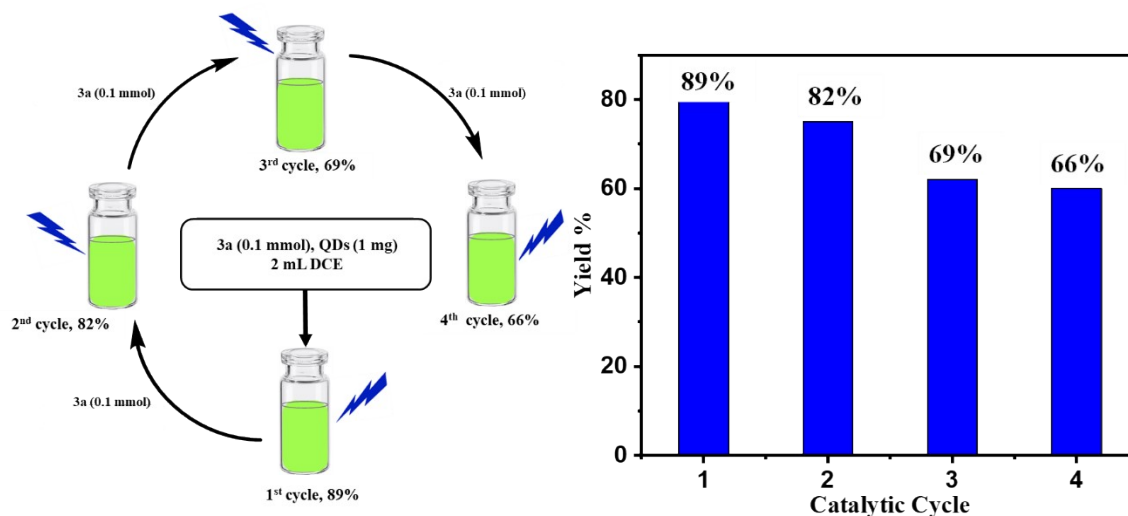

**Figure S8.** (a) Scheme for the recyclability test of QDs for the C-H amination of **3a**. (b) Yield % vs number of cycle plot.

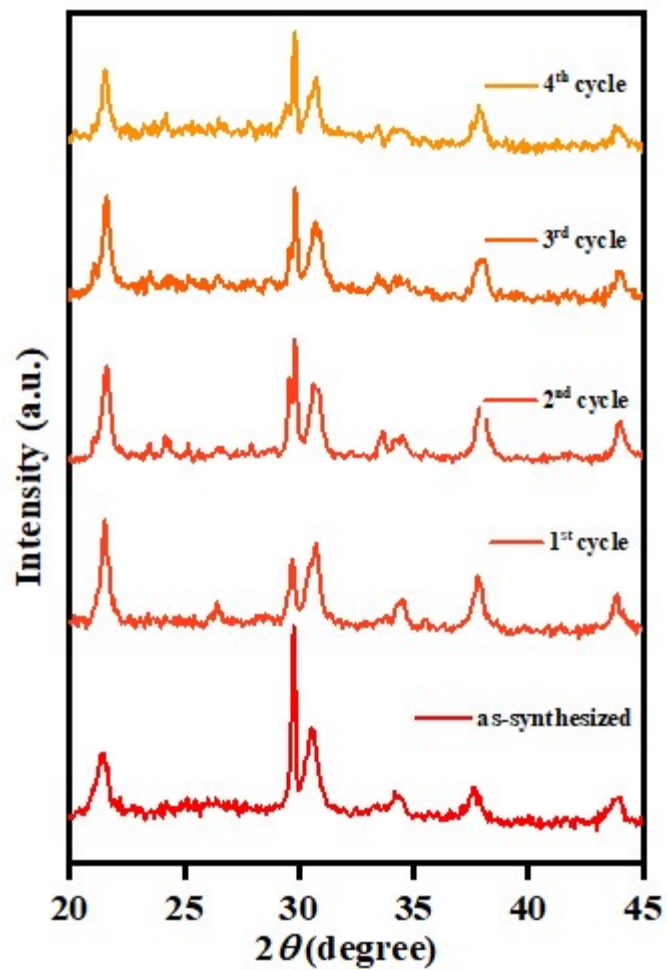

**Fig S9:** Powder X-ray diffraction (PXRD) patterns of CsPbBr<sub>3</sub> QDs after every catalytic cycle. It retains its orthorhombic phase in every cycle.

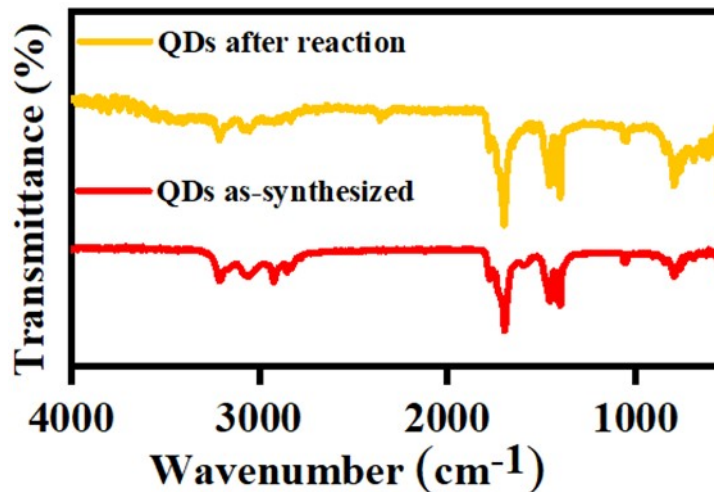

Fig S10: FTIR spectra of QDs before and after reaction.

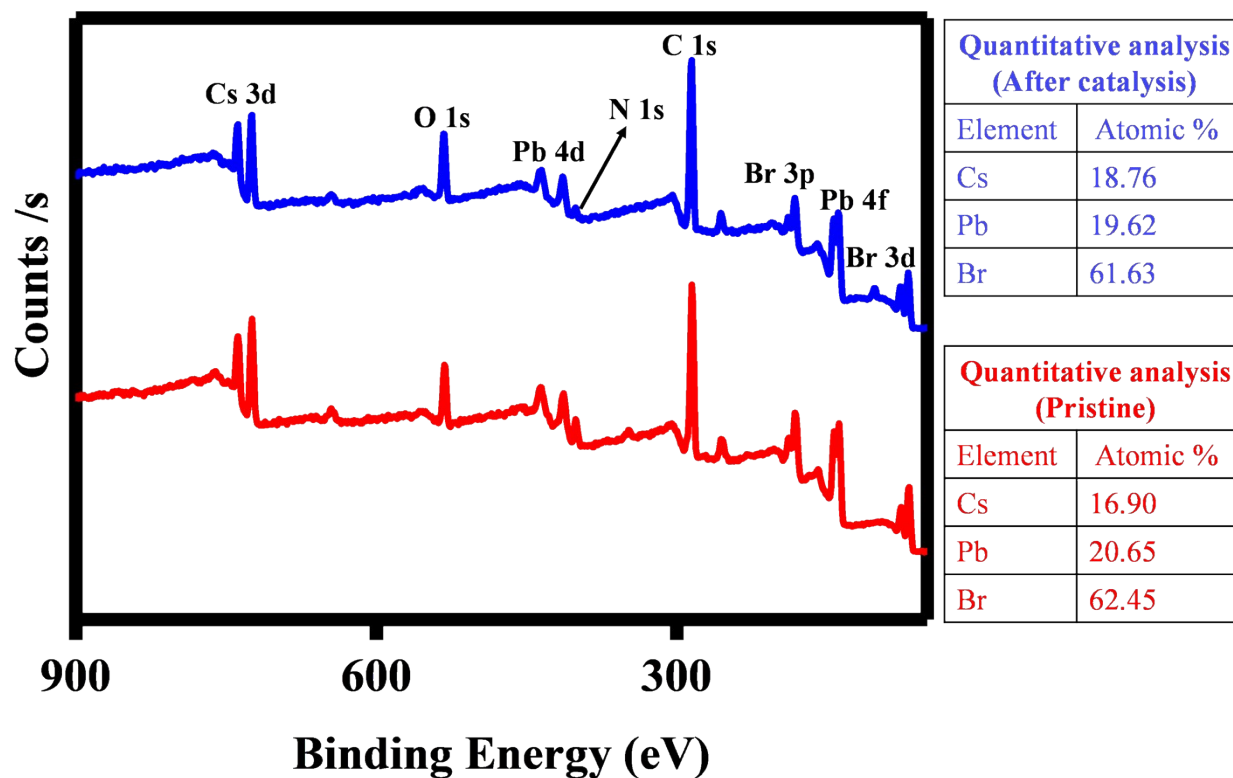

Fig S11: XPS survey spectra of CsPbBr<sub>3</sub> QDs before (red) and after (blue) photocatalysis with retention of structural integrity. Inset: quantitative analysis of pristine QDs (red) and QDs after catalysis (blue).

### 9. Determination of catalyst digestion:

In a 4 mL glass vial, **3a** (0.1 mmol) and CsPbBr<sub>3</sub> **QDs** (1mg) were dissolved in 3 mL 1,2-dichloroethane (DCE) and stirred under the photo-irradiation of Blue LED in the air at room temperature for 3h. After the reaction, QDs were removed by centrifugation (~10000 rpm) followed by filtration (~0.22 μm). The 20 μL of the filtrate were diluted with 15 mL of water and performed ICP-MS analysis. The ICP-MS results are shown in the following Table S1, The concentrations of Pb and Cs were  $0.44 \times 10^{-5}$  mol/L and  $0.39 \times 10^{-5}$  mol/L respectively.

**Table S1:** ICP-MS result. Amount of QDs in the reaction mixture before the reaction was 1 mg in 3 mL.

| Filtrate (μL) | Dilution (mL) | Pb ion concentration after the (ppb) | Pb ion concentration (mol/L) | Cs ion concentration (ppb) | Cs ion concentration (mol/L) |
|---------------|---------------|--------------------------------------|------------------------------|----------------------------|------------------------------|
| 20            | 15            | 5.9                                  | $0.44 \times 10^{-5}$        | 5.3                        | $0.39 \times 10^{-5}$        |

## 10. Calculation of the Turnover Number (TON):

a) For a 0.1 mmol scale reaction using 1.0 mg QDs we obtained 89%, 82%, 69%, 66% yields in 1<sup>st</sup>, 2<sup>nd</sup>, 3<sup>rd</sup> and 4<sup>th</sup> cycle respectively. The TON for conversion of **3a** to **4a** was calculated using the equation

$$\begin{aligned} \text{TON} &= \frac{\text{total mol of product 3a in 4 cycles}}{\text{total mol of catalyst employed}} \\ &= \frac{\{0.1 \text{ mmol} \times (0.89 + 0.82 + 0.69 + 0.66)\}}{(1.0 \text{ mg} \div 579.8 \text{ g mol}^{-1})} \approx 177 \end{aligned}$$

## 11. Procedure for gram-scale synthesis:

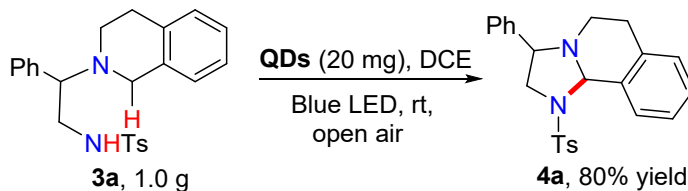

**3a** (2.46 mmol, 1g) was dissolved in DCE (20 ml) with catalyst loading of 20 mg at room temperature. The reaction was set at a distance of 6 cm away from Blue LED with continuous stirring. The progress of the reaction was monitored by TLC. The product **4a** obtained was isolated using Column Chromatography (ethyl acetate: pet ether ~5:95). The isolated yield is reported.

## 12. Copies of Cyclic voltammogram (CV) spectra:

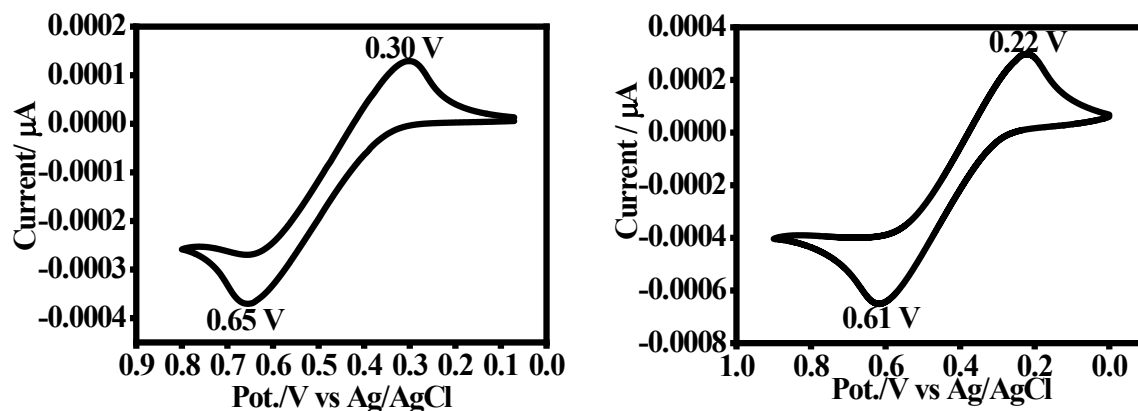

**Figure S12.** CV spectra of ferrocene/ferrocenium (Fc/Fc<sup>+</sup>) redox pair using TBAP (0.1 M) as a supporting electrolyte: (a) in N<sub>2</sub> saturated CH<sub>3</sub>CN (for organic substrate),  $E_{\text{redox}} = 0.42$  V vs Ag/AgCl and (b) in N<sub>2</sub> saturated 1:4 v/v of CH<sub>3</sub>CN and toluene (for QDs),  $E_{\text{redox}} = 0.48$  V vs Ag/AgCl.

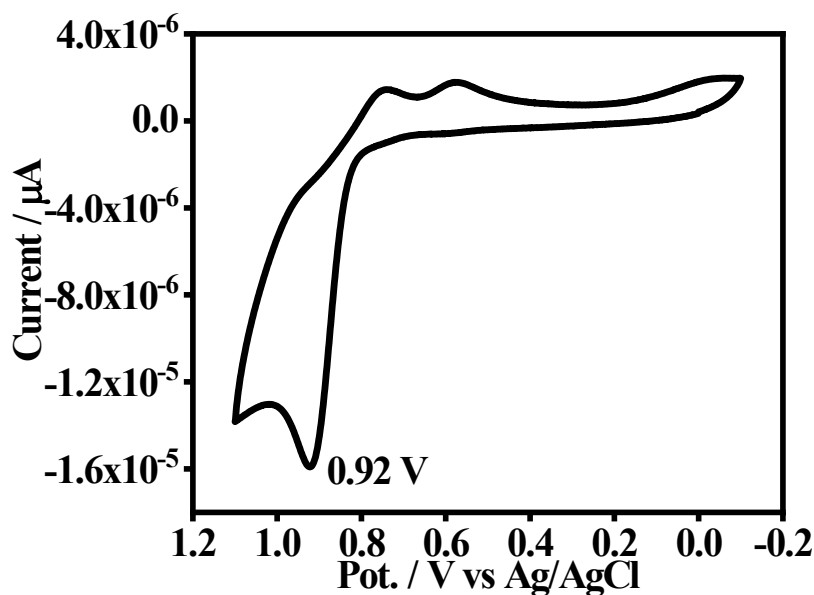

**Figure S13.** CV spectra of **1a** [(4-methyl-*N*-(2-(methyl(phenyl)amino)-2-phenylethyl)-benzenesulfonamide)] using TBAP (0.1 M) as electrolyte in N<sub>2</sub>-saturated CH<sub>3</sub>CN.  $E_{\text{ox}} = 0.92$  V vs Ag/AgCl.

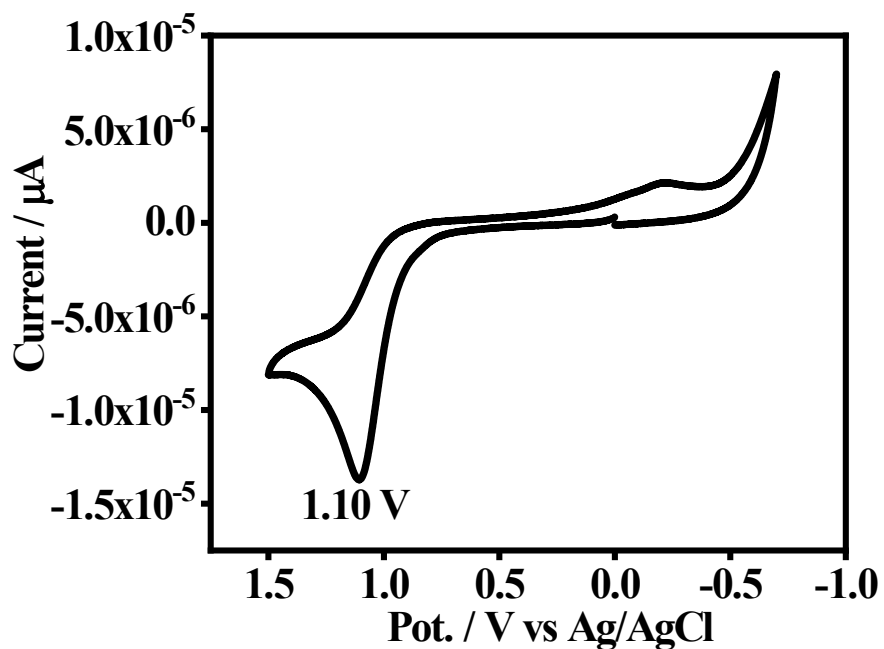

**Figure S14.** CV spectra of **3a** [*N*-(2-(3,4-dihydroisoquinolin-2(1*H*)-yl)-2-phenylethyl)-4-methylbenzenesulfonamide] using TBAP (0.1 M) as electrolyte in  $N_2$ -saturated  $CH_3CN$ .  $E_{ox} = 1.10$  V vs Ag/AgCl.

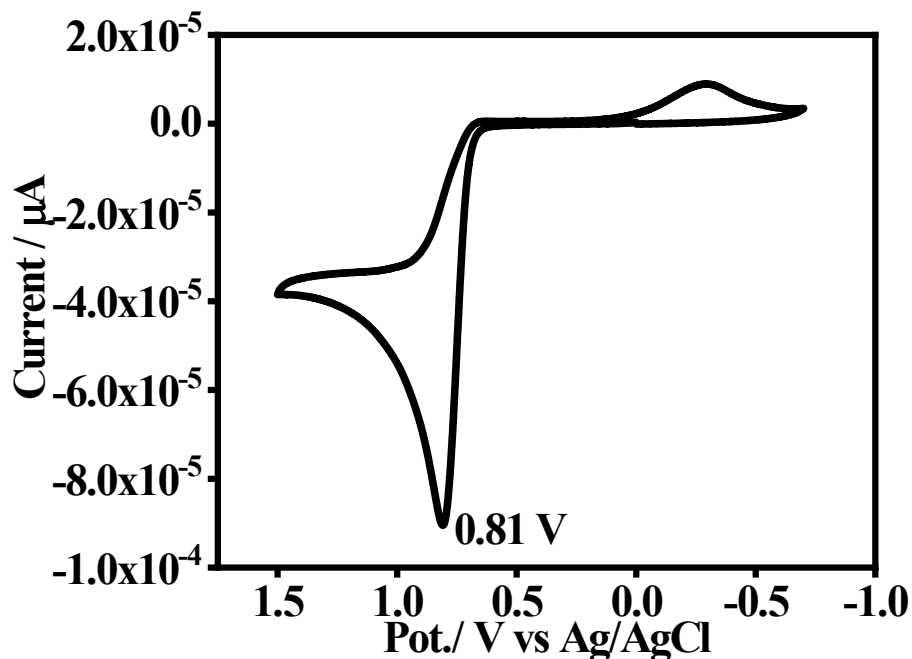

**Figure S15.** CV spectra of (2-(methyl(phenyl)amino)-2-phenylethan-1-ol **5(a)**) using TBAP (0.1 M) in  $N_2$  saturated  $CH_3CN$ .  $E_{ox} = 0.81$  V vs Ag/AgCl.



### 13. Photoluminescence quenching experiment:

The hole-accepting property of the substrate was examined using the Stern-Volmer equation<sup>9</sup>,

$$I_0/I = 1 + K_{sv}[Q]$$

where  $I_0$  and  $I$  are the PL maxima in the absence and presence of the quencher  $[Q]$  respectively.

The slope of  $[I_0/I - 1]$  vs  $[Q]$  plot gives the value of the Stern-Volmer quenching constant ( $K_{sv}$ ).

The quenching constant ( $K_{sv}$ ) was calculated using the Stern-Volmer equation<sup>9</sup>,

$$I_0/I = 1 + K_{sv}[Q]$$

1 mg of **QDs** was dispersed in 3 mL DCE. **1a** was progressively added and PL maxima was monitored.

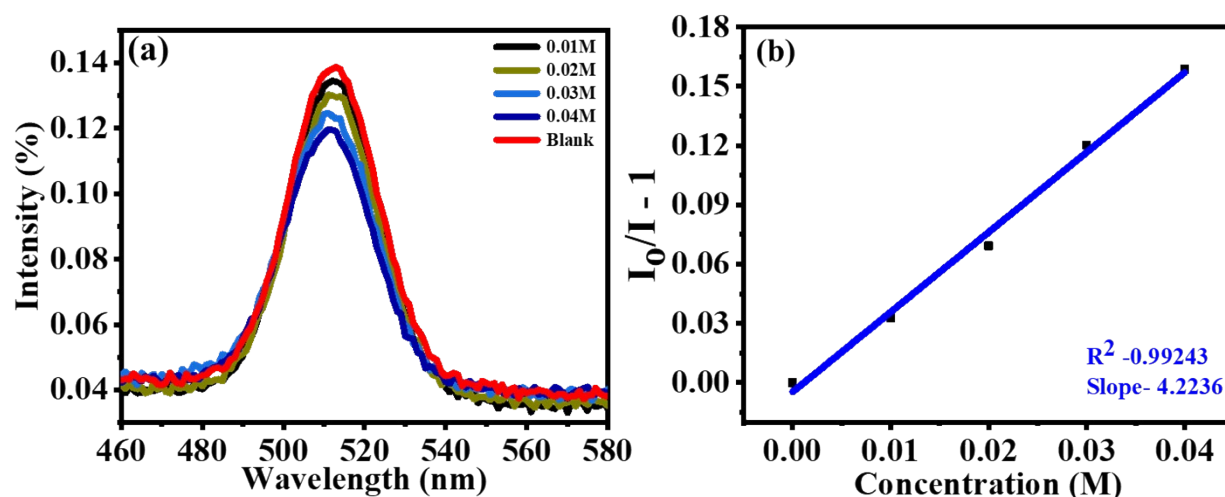

**Figure S16.** (a) The gradual quenching of PL of **QDs** (Excitation: 400 nm). with the increase of fluorophore (**1a**) concentration [0.01 to 0.04 M]; (b) Stern-Volmer plot ( $k_{sv} = 4.2236 \text{ M}^{-1}\text{s}^{-1}$ ).

#### 14. Superoxide radical anion ( $O_2^{\cdot-}$ ) detection study:

Benzoquinone (BZ) is a well-known superoxide radical anion ( $O_2^{\cdot-}$ ) scavenger.<sup>10-12</sup> A controlled experiment was performed by adding benzoquinone to the optimized reaction solution. The photocatalytic reaction is significantly inhibited resulting in traces amount of product monitored by TLC.

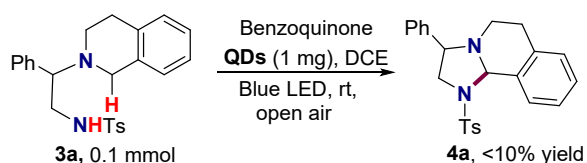

$O_2^{\cdot-}$  ion were detected by applying a standard analytical method in the presence of benzoquinone.<sup>13,14</sup> Briefly, to a solution of 5 mg benzoquinone in 3 mL DCE, CsPbBr<sub>3</sub> QDs (1 mg) was added. The solution was then irradiated under a blue LED with constant stirring in the open air and at room temperature. 10 mL of aliquots were added to 3mL solvent (hexane) and UV-visible absorption spectra were recorded after every 10 minutes of photo-irradiation. The *in-situ* generated  $O_2^{\cdot-}$  ion in the solution reacts with benzoquinone and transformed it into hydroquinone (HQ) with the emergence of the characteristic absorption peak at 386 nm.

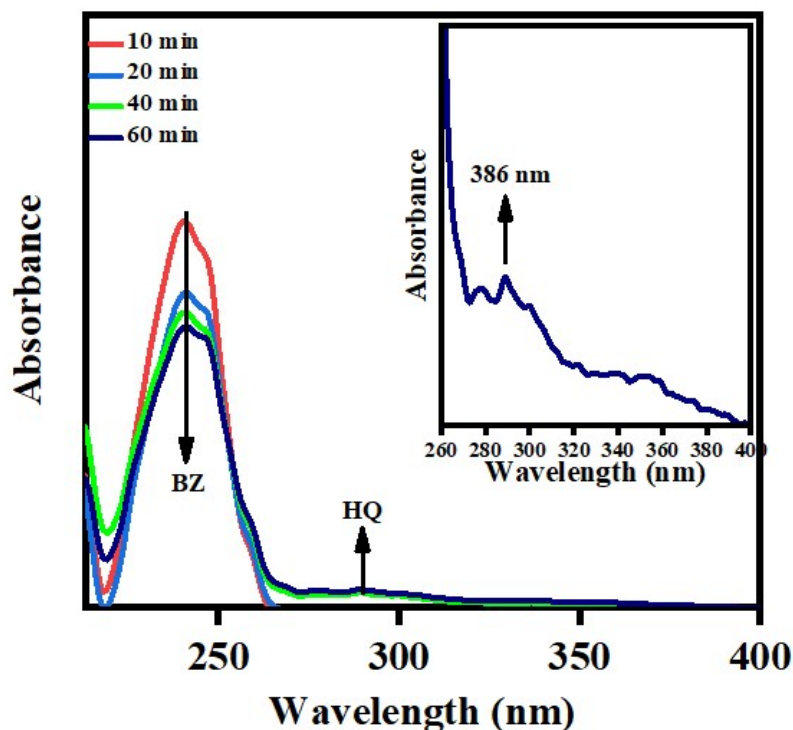

**Figure S17.** UV-Vis spectra for the detection of superoxide ions. The graph represents the temporal diminishing of benzoquinone (BZ) peak at 246 nm and the emergence of hydroquinone (HQ) peak at around 386 nm with reaction time (10- 60 min); Inset: UV-Vis spectra magnified around 260 nm to 350 nm depicting the formation of hydroquinone.

### 15. Intermediate trapping experiment:

To a vial containing 3mL DCE, 0.1 mmol of 3a, 0.2 mmol of TEMPO and 1mg of photocatalyst QDs were added. The solution was then kept under blue LED with constant stirring in open air and at room temperature. After 1h of continuous irradiation, aliquots of reaction mixture were taken out and performed ESI-MS characterization. The mass spectroscopy of TEMPO- trapped intermediate **I** *via* amino-radical was analysed in reaction solution.

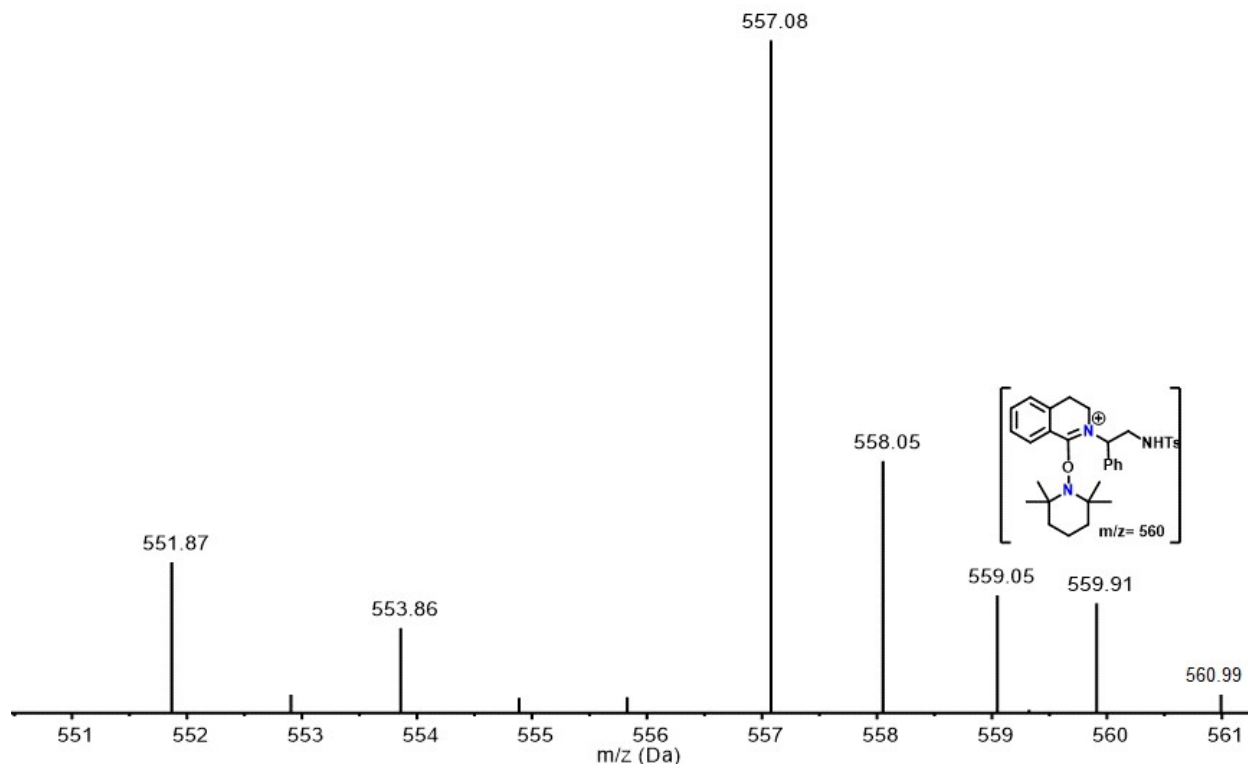

**Figure S18:** ESI-MS spectra of TEMPO trapped reaction mixture.

### 16. H<sub>2</sub>O<sub>2</sub> detection study:

A saturated solution of KI was prepared in acetonitrile. 0.4 mL of the 2h reaction mixture (C-H amination of **3a**) was taken out in a clean vial. 2.6 mL of KI solution was added to it followed by a few drops of glacial acetic acid (17.4 N). The H<sub>2</sub>O<sub>2</sub> present in the reaction mixture reacts with the iodide ion to generate a triiodide ion, which has a characteristic peak at 360 nm.<sup>15</sup> Controlled experiments were performed using blank aliquot, KI solution and KI+H<sub>2</sub>O<sub>2</sub> (commercially available).

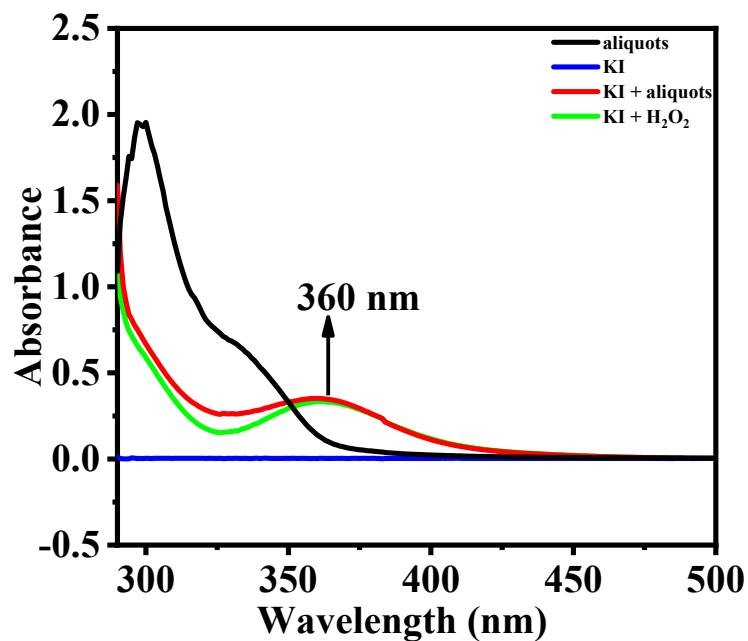

**Figure S19.** UV–Visible spectra for the detection of H<sub>2</sub>O<sub>2</sub>. Pure saturated KI solution (blue), KI solution + aliquots of reaction mixture of **3a** (red), KI + 30 % H<sub>2</sub>O<sub>2</sub> (green) and aliquots of reaction mixture in solvent (CH<sub>3</sub>CN).

### 17. Computational Studies:

The computational studies were performed by using Gaussian 09 software.<sup>16,17</sup> Dispersion corrected M06-2X DFT functional and basis set with one diffuse and two polarization functions, M06-2X/6-311+G(d,p) were used for optimization of all reactants, intermediates, transition states and product.<sup>16</sup> The vibrational frequencies calculation were also performed under the same functions and basis sets to verify that the transition state structures have only one imaginary frequency while the optimized intermediates and final product structures have only positive frequencies. The free energies ( $\Delta G$ ) were calculated using the zero-point energy corrected Gibbs free energy at 298.15 K (Sum of Thermal and Free Energies in Gaussian Output).

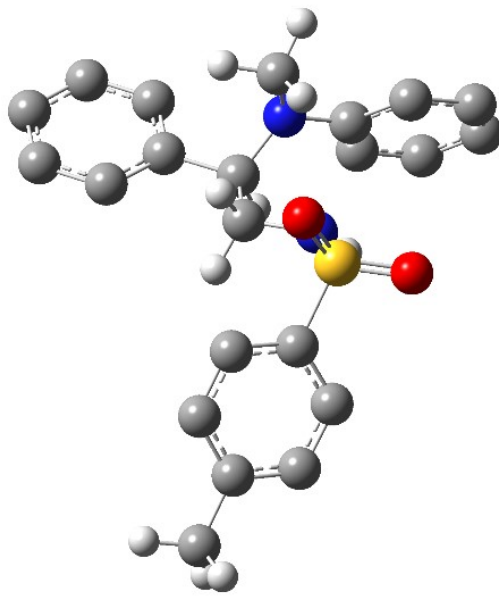

I

---

| Center Number | Atomic Number | Atomic Type | Coordinates (Angstroms) |           |           |
|---------------|---------------|-------------|-------------------------|-----------|-----------|
|               |               |             | X                       | Y         | Z         |
| 1             | 6             | 0           | 6.587966                | -2.193654 | 0.193500  |
| 2             | 6             | 0           | 5.308307                | -1.407017 | 0.124498  |
| 3             | 6             | 0           | 5.137055                | -0.418675 | -0.850973 |
| 4             | 6             | 0           | 3.979085                | 0.341840  | -0.905915 |
| 5             | 6             | 0           | 2.976450                | 0.098125  | 0.028735  |
| 6             | 6             | 0           | 3.117917                | -0.869164 | 1.017385  |
| 7             | 6             | 0           | 4.287585                | -1.617428 | 1.054259  |
| 8             | 16            | 0           | 1.471614                | 1.023766  | -0.073589 |
| 9             | 8             | 0           | 0.782656                | 0.916003  | 1.203283  |
| 10            | 8             | 0           | 1.740975                | 2.298512  | -0.696538 |
| 11            | 7             | 0           | 0.470995                | 0.224366  | -1.155355 |
| 12            | 6             | 0           | -0.287211               | -0.949459 | -0.751216 |

---

|    |   |   |           |           |           |
|----|---|---|-----------|-----------|-----------|
| 13 | 6 | 0 | -1.786094 | -0.594604 | -0.632396 |
| 14 | 6 | 0 | -2.717149 | -1.774669 | -0.421844 |
| 15 | 6 | 0 | -2.256834 | -3.065534 | -0.171419 |
| 16 | 6 | 0 | -3.163154 | -4.108379 | 0.005474  |
| 17 | 6 | 0 | -4.529322 | -3.866451 | -0.061394 |
| 18 | 6 | 0 | -4.994607 | -2.577546 | -0.310311 |
| 19 | 6 | 0 | -4.092019 | -1.539009 | -0.492074 |
| 20 | 7 | 0 | -1.954880 | 0.395971  | 0.452114  |
| 21 | 6 | 0 | -1.944771 | 1.730029  | 0.245596  |
| 22 | 6 | 0 | -2.034492 | 2.617959  | 1.365473  |
| 23 | 6 | 0 | -1.971367 | 3.975275  | 1.184593  |
| 24 | 6 | 0 | -1.823660 | 4.515411  | -0.101462 |
| 25 | 6 | 0 | -1.754486 | 3.667919  | -1.213352 |
| 26 | 6 | 0 | -1.818059 | 2.305202  | -1.059738 |
| 27 | 6 | 0 | -1.957526 | -0.137195 | 1.820077  |
| 28 | 1 | 0 | 7.349128  | -1.624362 | 0.733762  |
| 29 | 1 | 0 | 6.444898  | -3.139731 | 0.715386  |
| 30 | 1 | 0 | 6.976541  | -2.400915 | -0.804217 |
| 31 | 1 | 0 | 5.929339  | -0.235353 | -1.568129 |
| 32 | 1 | 0 | 3.859362  | 1.128088  | -1.642348 |
| 33 | 1 | 0 | 2.340529  | -1.007960 | 1.758986  |
| 34 | 1 | 0 | 4.415628  | -2.368422 | 1.825548  |
| 35 | 1 | 0 | 0.861186  | 0.212387  | -2.090743 |
| 36 | 1 | 0 | -0.181387 | -1.732386 | -1.504083 |
| 37 | 1 | 0 | 0.086112  | -1.341249 | 0.199062  |
| 38 | 1 | 0 | -2.082815 | -0.115923 | -1.561961 |
| 39 | 1 | 0 | -1.195810 | -3.279052 | -0.110646 |
| 40 | 1 | 0 | -2.797055 | -5.109796 | 0.195199  |

|    |   |   |           |           |           |
|----|---|---|-----------|-----------|-----------|
| 41 | 1 | 0 | -5.231504 | -4.679360 | 0.076216  |
| 42 | 1 | 0 | -6.058691 | -2.385021 | -0.369928 |
| 43 | 1 | 0 | -4.456080 | -0.535648 | -0.694092 |
| 44 | 1 | 0 | -2.139813 | 2.223753  | 2.364719  |
| 45 | 1 | 0 | -2.028597 | 4.631886  | 2.043153  |
| 46 | 1 | 0 | -1.764733 | 5.588441  | -0.234156 |
| 47 | 1 | 0 | -1.638537 | 4.086213  | -2.204627 |
| 48 | 1 | 0 | -1.736976 | 1.683214  | -1.935850 |
| 49 | 1 | 0 | -1.135827 | 0.309433  | 2.377614  |
| 50 | 1 | 0 | -2.917402 | 0.069351  | 2.297436  |
| 51 | 1 | 0 | -1.826837 | -1.214198 | 1.774864  |

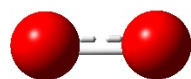

Superoxide anion ( $\text{O}_2^-$ )

| Center Number | Atomic Number | Atomic Type | Coordinates (Angstroms) |          |           |
|---------------|---------------|-------------|-------------------------|----------|-----------|
|               |               |             | X                       | Y        | Z         |
| 1             | 8             | 0           | 0.000000                | 0.000000 | 0.660945  |
| 2             | 8             | 0           | 0.000000                | 0.000000 | -0.660945 |



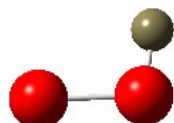

HO<sub>2</sub><sup>-</sup> anion

---

| Center Number | Atomic Number | Atomic Type | Coordinates (Angstroms) |           |          |
|---------------|---------------|-------------|-------------------------|-----------|----------|
|               |               |             | X                       | Y         | Z        |
| 1             | 8             | 0           | 0.055465                | 0.795451  | 0.000000 |
| 2             | 8             | 0           | 0.055465                | -0.687380 | 0.000000 |
| 3             | 1             | 0           | -0.887436               | -0.864569 | 0.000000 |

---

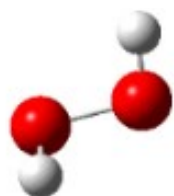

H<sub>2</sub>O<sub>2</sub>

---

| Center Number | Atomic Number | Atomic Type | Coordinates (Angstroms) |           |           |
|---------------|---------------|-------------|-------------------------|-----------|-----------|
|               |               |             | X                       | Y         | Z         |
| 1             | 8             | 0           | -0.701895               | 0.119161  | -0.053213 |
| 2             | 1             | 0           | -1.025353               | -0.652562 | 0.425707  |
| 3             | 8             | 0           | 0.701894                | -0.119162 | -0.053212 |
| 4             | 1             | 0           | 1.025354                | 0.652570  | 0.425691  |

---

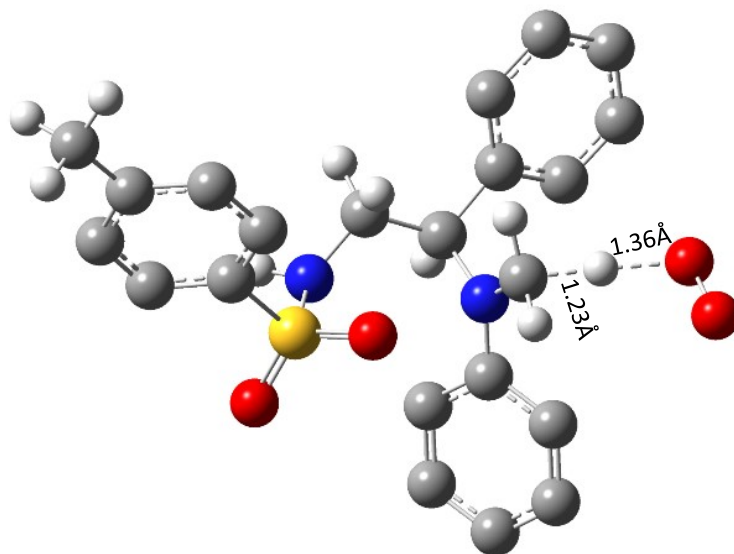

**TS-I**

| Center Number | Atomic Number | Atomic Type | Coordinates (Angstroms) |           |           |
|---------------|---------------|-------------|-------------------------|-----------|-----------|
|               |               |             | X                       | Y         | Z         |
| 1             | 6             | 0           | 7.063810                | -1.700498 | 0.714348  |
| 2             | 6             | 0           | 5.752634                | -0.995552 | 0.493956  |
| 3             | 6             | 0           | 5.643729                | 0.004117  | -0.483694 |
| 4             | 6             | 0           | 4.451971                | 0.688738  | -0.681985 |
| 5             | 6             | 0           | 3.351149                | 0.357095  | 0.108916  |
| 6             | 6             | 0           | 3.427138                | -0.622963 | 1.095383  |
| 7             | 6             | 0           | 4.632993                | -1.294792 | 1.277424  |
| 8             | 16            | 0           | 1.818259                | 1.193142  | -0.175342 |
| 9             | 8             | 0           | 0.962686                | 0.990692  | 0.990377  |
| 10            | 8             | 0           | 2.087792                | 2.504416  | -0.729937 |
| 11            | 7             | 0           | 1.023437                | 0.368804  | -1.409903 |
| 12            | 6             | 0           | 0.307576                | -0.861827 | -1.118513 |
| 13            | 6             | 0           | -1.215771               | -0.629156 | -1.079086 |
| 14            | 6             | 0           | -2.055443               | -1.893310 | -0.984439 |
| 15            | 6             | 0           | -1.509128               | -3.140985 | -0.678447 |
| 16            | 6             | 0           | -2.339367               | -4.258106 | -0.571156 |
| 17            | 6             | 0           | -3.712503               | -4.131572 | -0.758812 |
| 18            | 6             | 0           | -4.262440               | -2.885213 | -1.063754 |
| 19            | 6             | 0           | -3.436676               | -1.772797 | -1.179197 |
| 20            | 7             | 0           | -1.577266               | 0.259971  | 0.074539  |
| 21            | 6             | 0           | -1.986907               | 1.585171  | -0.130730 |
| 22            | 6             | 0           | -2.836978               | 2.197239  | 0.814406  |
| 23            | 6             | 0           | -3.208858               | 3.519448  | 0.638987  |

|    |   |   |           |           |           |
|----|---|---|-----------|-----------|-----------|
| 24 | 6 | 0 | -2.739401 | 4.243081  | -0.460345 |
| 25 | 6 | 0 | -1.899715 | 3.634837  | -1.396165 |
| 26 | 6 | 0 | -1.529905 | 2.307554  | -1.250982 |
| 27 | 6 | 0 | -1.577803 | -0.282955 | 1.294910  |
| 28 | 1 | 0 | 7.761904  | -1.044801 | 1.244420  |
| 29 | 1 | 0 | 6.934695  | -2.605941 | 1.310012  |
| 30 | 1 | 0 | 7.526973  | -1.974258 | -0.236838 |
| 31 | 1 | 0 | 6.511202  | 0.257136  | -1.086573 |
| 32 | 1 | 0 | 4.377093  | 1.484779  | -1.416668 |
| 33 | 1 | 0 | 2.569769  | -0.827285 | 1.728665  |
| 34 | 1 | 0 | 4.709719  | -2.053448 | 2.050632  |
| 35 | 1 | 0 | 1.553365  | 0.387152  | -2.276369 |
| 36 | 1 | 0 | 0.499138  | -1.589106 | -1.911890 |
| 37 | 1 | 0 | 0.652244  | -1.300794 | -0.174783 |
| 38 | 1 | 0 | -1.508405 | -0.082610 | -1.975839 |
| 39 | 1 | 0 | -0.440948 | -3.266008 | -0.528170 |
| 40 | 1 | 0 | -1.907712 | -5.226045 | -0.339796 |
| 41 | 1 | 0 | -4.354674 | -5.001460 | -0.671874 |
| 42 | 1 | 0 | -5.331371 | -2.782642 | -1.217251 |
| 43 | 1 | 0 | -3.865868 | -0.802717 | -1.424007 |
| 44 | 1 | 0 | -3.238351 | 1.636861  | 1.650975  |
| 45 | 1 | 0 | -3.878006 | 3.983865  | 1.354534  |
| 46 | 1 | 0 | -3.032857 | 5.279388  | -0.589997 |
| 47 | 1 | 0 | -1.518201 | 4.202615  | -2.237137 |
| 48 | 1 | 0 | -0.826893 | 1.864597  | -1.944467 |
| 49 | 1 | 0 | -1.471281 | 0.399431  | 2.143513  |
| 50 | 1 | 0 | -2.732052 | -0.610821 | 1.573824  |
| 51 | 1 | 0 | -1.120714 | -1.269299 | 1.364761  |
| 52 | 8 | 0 | -3.825980 | -0.726986 | 2.378556  |
| 53 | 8 | 0 | -3.600089 | 0.112428  | 3.380653  |

---

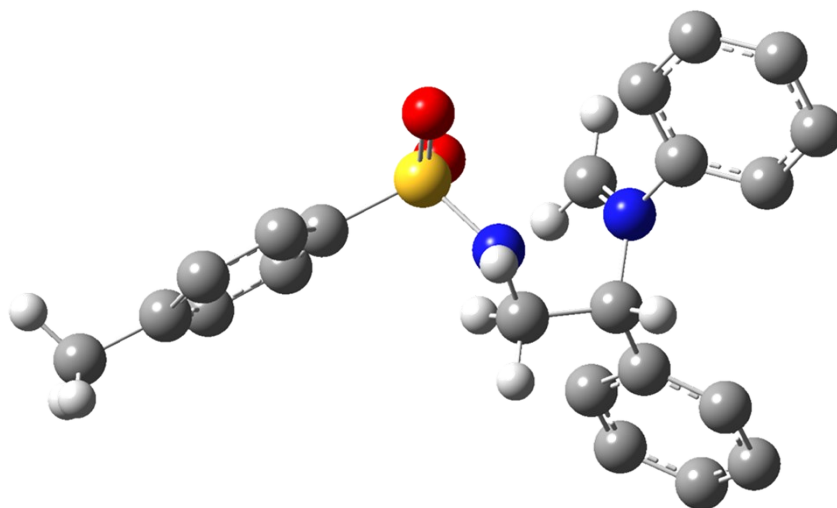

## II

| -----  |        |        |                         |           |           |  |
|--------|--------|--------|-------------------------|-----------|-----------|--|
| Center | Atomic | Atomic | Coordinates (Angstroms) |           |           |  |
| Number | Number | Type   | X                       | Y         | Z         |  |
| -----  |        |        |                         |           |           |  |
| 1      | 6      | 0      | -6.874566               | 1.348213  | -0.565736 |  |
| 2      | 6      | 0      | -5.525751               | 0.722990  | -0.341901 |  |
| 3      | 6      | 0      | -5.165063               | -0.444065 | -1.025127 |  |
| 4      | 6      | 0      | -3.941287               | -1.055422 | -0.803487 |  |
| 5      | 6      | 0      | -3.065249               | -0.479423 | 0.113346  |  |
| 6      | 6      | 0      | -3.395399               | 0.673029  | 0.817231  |  |
| 7      | 6      | 0      | -4.628050               | 1.267543  | 0.578866  |  |
| 8      | 16     | 0      | -1.483696               | -1.231211 | 0.352486  |  |
| 9      | 8      | 0      | -0.924319               | -0.713964 | 1.599654  |  |
| 10     | 8      | 0      | -1.579897               | -2.649417 | 0.100302  |  |
| 11     | 7      | 0      | -0.450456               | -0.655278 | -0.827640 |  |
| 12     | 6      | 0      | 0.057781                | 0.706118  | -0.755631 |  |

|    |   |   |           |           |           |
|----|---|---|-----------|-----------|-----------|
| 13 | 6 | 0 | 1.583754  | 0.705156  | -0.553418 |
| 14 | 6 | 0 | 2.184092  | 2.073800  | -0.330292 |
| 15 | 6 | 0 | 1.574746  | 3.032782  | 0.482807  |
| 16 | 6 | 0 | 2.175471  | 4.271908  | 0.677137  |
| 17 | 6 | 0 | 3.383355  | 4.568399  | 0.055362  |
| 18 | 6 | 0 | 3.987116  | 3.626473  | -0.770614 |
| 19 | 6 | 0 | 3.388571  | 2.387309  | -0.962171 |
| 20 | 7 | 0 | 1.910575  | -0.258957 | 0.565114  |
| 21 | 6 | 0 | 2.545053  | -1.515755 | 0.217335  |
| 22 | 6 | 0 | 3.772719  | -1.486071 | -0.433650 |
| 23 | 6 | 0 | 4.385666  | -2.691353 | -0.749370 |
| 24 | 6 | 0 | 3.767278  | -3.896305 | -0.423878 |
| 25 | 6 | 0 | 2.536326  | -3.902839 | 0.222596  |
| 26 | 6 | 0 | 1.910224  | -2.704923 | 0.550431  |
| 27 | 6 | 0 | 1.524336  | -0.040956 | 1.759852  |
| 28 | 1 | 0 | -7.630971 | 0.828909  | 0.028838  |
| 29 | 1 | 0 | -6.879882 | 2.397589  | -0.271630 |
| 30 | 1 | 0 | -7.171694 | 1.277540  | -1.612699 |
| 31 | 1 | 0 | -5.860645 | -0.885095 | -1.730246 |
| 32 | 1 | 0 | -3.675424 | -1.975887 | -1.310425 |
| 33 | 1 | 0 | -2.715304 | 1.073192  | 1.559257  |
| 34 | 1 | 0 | -4.903426 | 2.160993  | 1.127541  |
| 35 | 1 | 0 | -0.666290 | -1.028611 | -1.744837 |
| 36 | 1 | 0 | -0.160969 | 1.261474  | -1.669592 |
| 37 | 1 | 0 | -0.433748 | 1.232300  | 0.064844  |
| 38 | 1 | 0 | 2.043403  | 0.250340  | -1.430259 |
| 39 | 1 | 0 | 0.619797  | 2.842415  | 0.960567  |
| 40 | 1 | 0 | 1.693594  | 5.008974  | 1.307455  |



|    |    |   |           |           |           |
|----|----|---|-----------|-----------|-----------|
| 3  | 1  | 0 | -1.001464 | -1.040280 | 3.657347  |
| 4  | 6  | 0 | 6.971492  | 1.296440  | 0.463935  |
| 5  | 6  | 0 | 5.604713  | 0.729671  | 0.181991  |
| 6  | 6  | 0 | 4.709309  | 0.479051  | 1.223053  |
| 7  | 6  | 0 | 3.456528  | -0.072956 | 0.980592  |
| 8  | 6  | 0 | 3.105308  | -0.373055 | -0.331178 |
| 9  | 6  | 0 | 3.970175  | -0.125913 | -1.390243 |
| 10 | 6  | 0 | 5.216837  | 0.425178  | -1.125046 |
| 11 | 16 | 0 | 1.515852  | -1.124232 | -0.650260 |
| 12 | 8  | 0 | 1.085937  | -0.614386 | -1.973741 |
| 13 | 8  | 0 | 1.632420  | -2.567126 | -0.513628 |
| 14 | 7  | 0 | 0.507163  | -0.595280 | 0.477303  |
| 15 | 6  | 0 | 0.027990  | 0.772050  | 0.387524  |
| 16 | 6  | 0 | -1.500030 | 0.725371  | 0.249951  |
| 17 | 6  | 0 | -2.196549 | 2.052014  | 0.067306  |
| 18 | 6  | 0 | -1.722242 | 3.026798  | -0.812950 |
| 19 | 6  | 0 | -2.402695 | 4.230351  | -0.964066 |
| 20 | 6  | 0 | -3.558347 | 4.477017  | -0.230436 |
| 21 | 6  | 0 | -4.026459 | 3.520398  | 0.663822  |
| 22 | 6  | 0 | -3.347221 | 2.316372  | 0.811263  |
| 23 | 7  | 0 | -1.825610 | -0.235128 | -0.871508 |
| 24 | 6  | 0 | -2.556498 | -1.436396 | -0.523010 |
| 25 | 6  | 0 | -3.899233 | -1.310053 | -0.188872 |
| 26 | 6  | 0 | -4.608381 | -2.453005 | 0.157477  |
| 27 | 6  | 0 | -3.969609 | -3.690513 | 0.172734  |
| 28 | 6  | 0 | -2.622359 | -3.789558 | -0.155971 |
| 29 | 6  | 0 | -1.894634 | -2.655562 | -0.505314 |
| 30 | 6  | 0 | -1.348202 | -0.085068 | -2.043088 |

|    |   |   |           |           |           |
|----|---|---|-----------|-----------|-----------|
| 31 | 1 | 0 | 7.692418  | 0.489809  | 0.623512  |
| 32 | 1 | 0 | 7.328869  | 1.900767  | -0.371172 |
| 33 | 1 | 0 | 6.963513  | 1.916621  | 1.361226  |
| 34 | 1 | 0 | 4.991289  | 0.723589  | 2.241450  |
| 35 | 1 | 0 | 2.761591  | -0.247003 | 1.798888  |
| 36 | 1 | 0 | 3.658538  | -0.352074 | -2.402954 |
| 37 | 1 | 0 | 5.898352  | 0.626912  | -1.944696 |
| 38 | 1 | 0 | 0.683174  | -0.845811 | 1.608085  |
| 39 | 1 | 0 | 0.247107  | 1.297246  | 1.322853  |
| 40 | 1 | 0 | 0.486518  | 1.325159  | -0.438436 |
| 41 | 1 | 0 | -1.864172 | 0.228125  | 1.148758  |
| 42 | 1 | 0 | -0.805837 | 2.869527  | -1.371086 |
| 43 | 1 | 0 | -2.022100 | 4.980585  | -1.646641 |
| 44 | 1 | 0 | -4.083653 | 5.417445  | -0.345314 |
| 45 | 1 | 0 | -4.914376 | 3.714691  | 1.253279  |
| 46 | 1 | 0 | -3.697833 | 1.577885  | 1.524717  |
| 47 | 1 | 0 | -4.375143 | -0.336117 | -0.213679 |
| 48 | 1 | 0 | -5.658057 | -2.376876 | 0.412539  |
| 49 | 1 | 0 | -4.524340 | -4.579011 | 0.448664  |
| 50 | 1 | 0 | -2.121713 | -4.749200 | -0.128003 |
| 51 | 1 | 0 | -0.832352 | -2.713728 | -0.717162 |
| 52 | 1 | 0 | -1.537802 | -0.840168 | -2.795899 |
| 53 | 1 | 0 | -0.784348 | 0.802248  | -2.289312 |

---



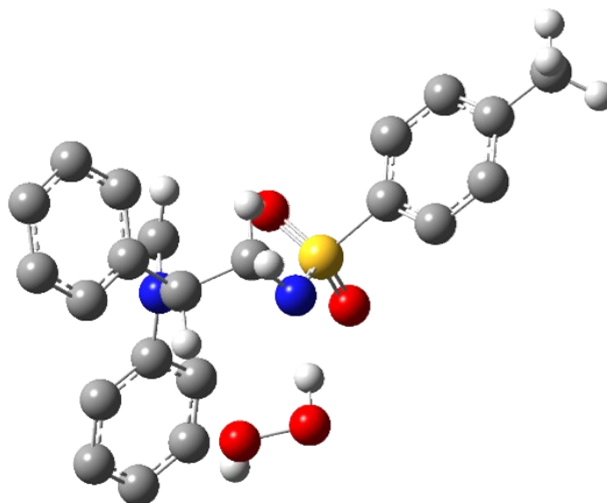

III

---

| Center Number | Atomic Number | Atomic Type | Coordinates (Angstroms) |           |           |
|---------------|---------------|-------------|-------------------------|-----------|-----------|
|               |               |             | X                       | Y         | Z         |
| 1             | 8             | 0           | -0.672958               | -1.855974 | 2.756325  |
| 2             | 8             | 0           | -2.000723               | -1.620209 | 2.295180  |
| 3             | 1             | 0           | -2.246862               | -2.474511 | 1.917907  |
| 4             | 6             | 0           | 7.082099                | 1.176717  | 0.506816  |
| 5             | 6             | 0           | 5.689839                | 0.654474  | 0.265426  |
| 6             | 6             | 0           | 4.911192                | 0.195555  | 1.332021  |
| 7             | 6             | 0           | 3.637045                | -0.311896 | 1.120890  |
| 8             | 6             | 0           | 3.133528                | -0.365415 | -0.174739 |
| 9             | 6             | 0           | 3.883434                | 0.087000  | -1.251021 |
| 10            | 6             | 0           | 5.158094                | 0.596681  | -1.022340 |
| 11            | 16            | 0           | 1.496782                | -1.059182 | -0.426313 |
| 12            | 8             | 0           | 1.105962                | -0.535590 | -1.778877 |

---

|    |   |   |           |           |           |
|----|---|---|-----------|-----------|-----------|
| 13 | 8 | 0 | 1.605677  | -2.511273 | -0.338952 |
| 14 | 7 | 0 | 0.553560  | -0.535014 | 0.718601  |
| 15 | 6 | 0 | 0.093033  | 0.833185  | 0.625117  |
| 16 | 6 | 0 | -1.417084 | 0.845521  | 0.315468  |
| 17 | 6 | 0 | -2.052263 | 2.211152  | 0.195811  |
| 18 | 6 | 0 | -1.467487 | 3.246096  | -0.537588 |
| 19 | 6 | 0 | -2.090130 | 4.486612  | -0.627762 |
| 20 | 6 | 0 | -3.298442 | 4.712102  | 0.023070  |
| 21 | 6 | 0 | -3.877262 | 3.695381  | 0.774794  |
| 22 | 6 | 0 | -3.255344 | 2.454898  | 0.860292  |
| 23 | 7 | 0 | -1.643821 | 0.005784  | -0.917519 |
| 24 | 6 | 0 | -2.386253 | -1.222658 | -0.755852 |
| 25 | 6 | 0 | -3.707701 | -1.144556 | -0.334276 |
| 26 | 6 | 0 | -4.412447 | -2.320597 | -0.115523 |
| 27 | 6 | 0 | -3.791496 | -3.552642 | -0.314276 |
| 28 | 6 | 0 | -2.468375 | -3.608734 | -0.740511 |
| 29 | 6 | 0 | -1.749053 | -2.437701 | -0.964337 |
| 30 | 6 | 0 | -1.016861 | 0.244211  | -2.008255 |
| 31 | 1 | 0 | 7.787659  | 0.348469  | 0.615537  |
| 32 | 1 | 0 | 7.421158  | 1.797432  | -0.323442 |
| 33 | 1 | 0 | 7.126787  | 1.770332  | 1.421600  |
| 34 | 1 | 0 | 5.308958  | 0.241365  | 2.340498  |
| 35 | 1 | 0 | 3.026074  | -0.658723 | 1.946874  |
| 36 | 1 | 0 | 3.463031  | 0.043990  | -2.248057 |
| 37 | 1 | 0 | 5.747948  | 0.956490  | -1.858837 |
| 38 | 1 | 0 | -0.132050 | -1.479109 | 2.010049  |
| 39 | 1 | 0 | 0.211904  | 1.344946  | 1.586268  |
| 40 | 1 | 0 | 0.638308  | 1.430043  | -0.118684 |

|    |   |   |           |           |           |
|----|---|---|-----------|-----------|-----------|
| 41 | 1 | 0 | -1.905062 | 0.279279  | 1.108931  |
| 42 | 1 | 0 | -0.509573 | 3.104868  | -1.025620 |
| 43 | 1 | 0 | -1.624047 | 5.281176  | -1.198025 |
| 44 | 1 | 0 | -3.779486 | 5.680378  | -0.044695 |
| 45 | 1 | 0 | -4.808407 | 3.869474  | 1.300513  |
| 46 | 1 | 0 | -3.695652 | 1.667850  | 1.464284  |
| 47 | 1 | 0 | -4.168812 | -0.176549 | -0.175380 |
| 48 | 1 | 0 | -5.442857 | -2.275883 | 0.214391  |
| 49 | 1 | 0 | -4.340372 | -4.468613 | -0.132169 |
| 50 | 1 | 0 | -1.977943 | -4.563836 | -0.881161 |
| 51 | 1 | 0 | -0.702202 | -2.476786 | -1.244008 |
| 52 | 1 | 0 | -1.146719 | -0.420085 | -2.851826 |
| 53 | 1 | 0 | -0.460527 | 1.161573  | -2.120253 |

---

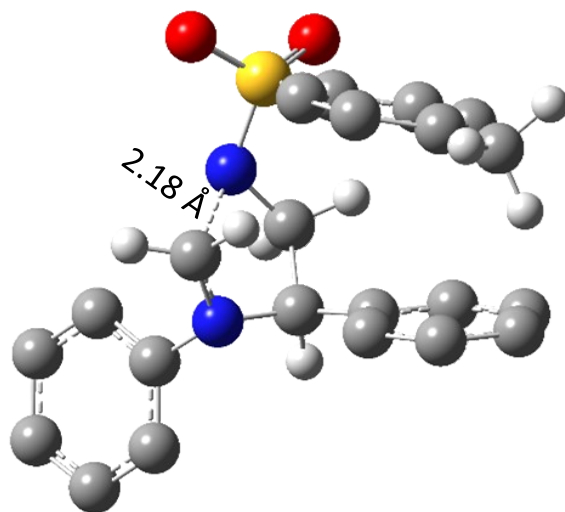

**TS-III**

| Center<br>Number | Atomic<br>Number | Atomic<br>Type | Coordinates (Angstroms) |           |           |
|------------------|------------------|----------------|-------------------------|-----------|-----------|
|                  |                  |                | X                       | Y         | Z         |
| 1                | 6                | 0              | 3.195319                | -0.563991 | -0.493495 |
| 2                | 6                | 0              | 3.889557                | -1.770128 | -0.565129 |
| 3                | 6                | 0              | 5.279834                | -1.762203 | -0.496911 |
| 4                | 6                | 0              | 5.966098                | -0.554867 | -0.360348 |
| 5                | 6                | 0              | 5.260414                | 0.644150  | -0.282470 |
| 6                | 6                | 0              | 3.867008                | 0.648611  | -0.340971 |
| 7                | 7                | 0              | 1.754463                | -0.599262 | -0.547936 |
| 8                | 6                | 0              | 1.131230                | 0.348690  | -1.258149 |
| 9                | 7                | 0              | 0.912661                | 1.614434  | 0.500772  |
| 10               | 6                | 0              | 0.996198                | 0.542124  | 1.459061  |
| 11               | 6                | 0              | 1.098280                | -0.874732 | 0.733897  |
| 12               | 6                | 0              | -0.215618               | -1.631793 | 0.627650  |
| 13               | 6                | 0              | -0.879823               | -1.947303 | 1.819908  |
| 14               | 6                | 0              | -2.036333               | -2.718394 | 1.811571  |
| 15               | 6                | 0              | -2.557994               | -3.183592 | 0.603975  |
| 16               | 6                | 0              | -1.904645               | -2.877229 | -0.585052 |
| 17               | 6                | 0              | -0.734403               | -2.116448 | -0.573222 |
| 18               | 16               | 0              | -0.417760               | 2.562129  | 0.480268  |
| 19               | 8                | 0              | -0.737645               | 2.965155  | 1.851093  |
| 20               | 8                | 0              | -0.190767               | 3.556432  | -0.564032 |
| 21               | 6                | 0              | -1.812537               | 1.578419  | -0.073562 |
| 22               | 6                | 0              | -2.570082               | 0.865677  | 0.854556  |
| 23               | 6                | 0              | -3.612115               | 0.061872  | 0.407441  |
| 24               | 6                | 0              | -3.910315               | -0.044709 | -0.955976 |
| 25               | 6                | 0              | -5.026705               | -0.945008 | -1.416399 |
| 26               | 6                | 0              | -3.153435               | 0.697707  | -1.866125 |
| 27               | 6                | 0              | -2.110386               | 1.515001  | -1.432295 |
| 28               | 1                | 0              | 3.336269                | -2.697233 | -0.684541 |
| 29               | 1                | 0              | 5.827277                | -2.697008 | -0.559512 |
| 30               | 1                | 0              | 7.050146                | -0.550587 | -0.311880 |
| 31               | 1                | 0              | 5.792004                | 1.582738  | -0.164177 |
| 32               | 1                | 0              | 3.295160                | 1.569194  | -0.245857 |
| 33               | 1                | 0              | 1.705772                | 0.909763  | -1.987206 |
| 34               | 1                | 0              | 0.057641                | 0.269012  | -1.381938 |
| 35               | 1                | 0              | 1.912362                | 0.662168  | 2.049021  |
| 36               | 1                | 0              | 0.148836                | 0.520308  | 2.152884  |
| 37               | 1                | 0              | 1.785165                | -1.503275 | 1.308422  |
| 38               | 1                | 0              | -0.478931               | -1.597531 | 2.768526  |
| 39               | 1                | 0              | -2.529428               | -2.958363 | 2.748533  |

|    |   |   |           |           |           |
|----|---|---|-----------|-----------|-----------|
| 40 | 1 | 0 | -3.462519 | -3.784212 | 0.593943  |
| 41 | 1 | 0 | -2.297154 | -3.235510 | -1.532234 |
| 42 | 1 | 0 | -0.220116 | -1.924257 | -1.509295 |
| 43 | 1 | 0 | -2.352813 | 0.966162  | 1.913788  |
| 44 | 1 | 0 | -4.205094 | -0.496598 | 1.127602  |
| 45 | 1 | 0 | -5.968054 | -0.689694 | -0.920784 |
| 46 | 1 | 0 | -5.178809 | -0.872166 | -2.495694 |
| 47 | 1 | 0 | -4.800568 | -1.989394 | -1.173074 |
| 48 | 1 | 0 | -3.391394 | 0.648297  | -2.925570 |
| 49 | 1 | 0 | -1.541457 | 2.124096  | -2.129309 |

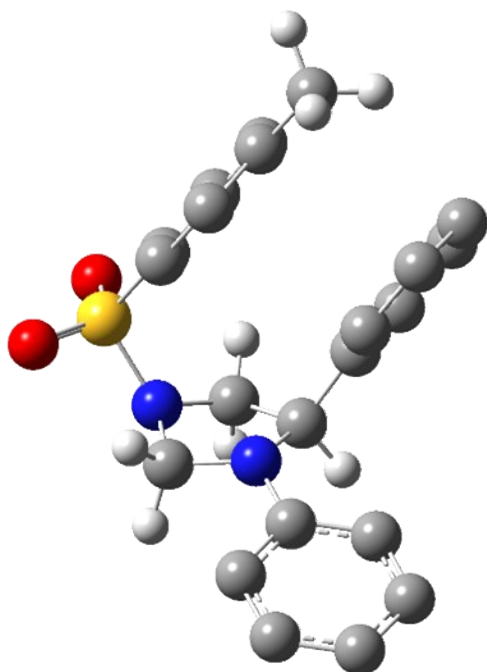

**2a**

| Center Number | Atomic Number | Atomic Type | Coordinates (Angstroms) |           |           |
|---------------|---------------|-------------|-------------------------|-----------|-----------|
|               |               |             | X                       | Y         | Z         |
| 1             | 6             | 0           | 2.849185                | 0.032656  | -0.133162 |
| 2             | 6             | 0           | 3.304717                | -1.206699 | 0.346483  |
| 3             | 6             | 0           | 4.518145                | -1.724429 | -0.086484 |
| 4             | 6             | 0           | 5.306458                | -1.035981 | -1.002285 |

|    |    |   |           |           |           |
|----|----|---|-----------|-----------|-----------|
| 5  | 6  | 0 | 4.856720  | 0.187401  | -1.485545 |
| 6  | 6  | 0 | 3.646428  | 0.721335  | -1.062687 |
| 7  | 7  | 0 | 1.624868  | 0.559188  | 0.272057  |
| 8  | 6  | 0 | 1.365201  | 1.982098  | 0.055578  |
| 9  | 7  | 0 | 0.209446  | 2.273311  | 0.880427  |
| 10 | 6  | 0 | 0.233797  | 1.346008  | 2.012966  |
| 11 | 6  | 0 | 0.975111  | 0.088749  | 1.493358  |
| 12 | 6  | 0 | 0.087479  | -1.129575 | 1.283181  |
| 13 | 6  | 0 | -0.652043 | -1.624033 | 2.360658  |
| 14 | 6  | 0 | -1.425227 | -2.770226 | 2.224655  |
| 15 | 6  | 0 | -1.455521 | -3.448821 | 1.008396  |
| 16 | 6  | 0 | -0.719663 | -2.962746 | -0.065315 |
| 17 | 6  | 0 | 0.042166  | -1.804833 | 0.067531  |
| 18 | 16 | 0 | -1.252279 | 2.626540  | 0.152955  |
| 19 | 8  | 0 | -2.129548 | 3.010006  | 1.238861  |
| 20 | 8  | 0 | -0.924997 | 3.518788  | -0.940046 |
| 21 | 6  | 0 | -1.909353 | 1.129292  | -0.547560 |
| 22 | 6  | 0 | -2.786872 | 0.356518  | 0.208548  |
| 23 | 6  | 0 | -3.293230 | -0.810265 | -0.340533 |
| 24 | 6  | 0 | -2.937765 | -1.211954 | -1.631235 |
| 25 | 6  | 0 | -3.501221 | -2.485059 | -2.201732 |
| 26 | 6  | 0 | -2.061829 | -0.415277 | -2.367906 |
| 27 | 6  | 0 | -1.543920 | 0.760020  | -1.835416 |
| 28 | 1  | 0 | 2.702162  | -1.778126 | 1.041039  |
| 29 | 1  | 0 | 4.846341  | -2.682819 | 0.298906  |
| 30 | 1  | 0 | 6.251339  | -1.446407 | -1.334775 |
| 31 | 1  | 0 | 5.452855  | 0.740565  | -2.201987 |
| 32 | 1  | 0 | 3.323140  | 1.673118  | -1.464200 |
| 33 | 1  | 0 | 2.216489  | 2.590046  | 0.392528  |
| 34 | 1  | 0 | 1.161254  | 2.218378  | -0.990116 |
| 35 | 1  | 0 | 0.794435  | 1.811731  | 2.826014  |
| 36 | 1  | 0 | -0.776452 | 1.141221  | 2.365494  |
| 37 | 1  | 0 | 1.738231  | -0.188222 | 2.233377  |
| 38 | 1  | 0 | -0.616966 | -1.113156 | 3.318830  |
| 39 | 1  | 0 | -1.994603 | -3.140237 | 3.069296  |
| 40 | 1  | 0 | -2.046255 | -4.351735 | 0.903718  |
| 41 | 1  | 0 | -0.741109 | -3.480471 | -1.018151 |
| 42 | 1  | 0 | 0.606728  | -1.422600 | -0.774607 |
| 43 | 1  | 0 | -3.077152 | 0.684166  | 1.199586  |
| 44 | 1  | 0 | -3.970394 | -1.425841 | 0.241954  |
| 45 | 1  | 0 | -4.561509 | -2.365658 | -2.439191 |
| 46 | 1  | 0 | -2.981366 | -2.776718 | -3.114983 |
| 47 | 1  | 0 | -3.414718 | -3.298607 | -1.477232 |

|    |   |   |           |           |           |
|----|---|---|-----------|-----------|-----------|
| 48 | 1 | 0 | -1.784384 | -0.713493 | -3.373062 |
| 49 | 1 | 0 | -0.888023 | 1.397304  | -2.416591 |

---

**Table S2: Mullikan Charge Distribution on sp<sup>3</sup> C and H in intermediate-I**

| Sp3 C-H bond | Bond length (A) | Mullikan Charge on H atom | Mullikan Charge on sp <sup>3</sup> carbon atom |
|--------------|-----------------|---------------------------|------------------------------------------------|
| C(27)–H(36)  | 1.093           | 0.241                     | -0.252                                         |
| C(12)–H(32)  | 1.093           | 0.208                     | -0.318                                         |
| C(13)–H(34)  | 1.089           | 0.167                     | -0.012                                         |

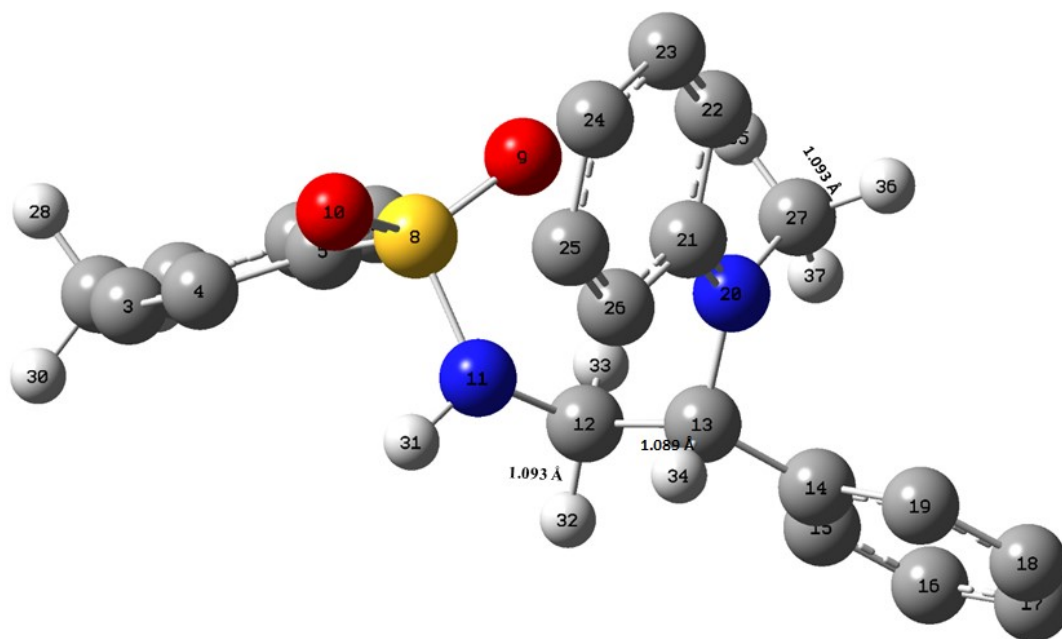

**Figure S20: Optimized structure of intermediate I.**

## 18. Apparent Quantum Yield (AQE) calculation:

The apparent quantum efficiency (AQE) of conversion of **3a** to **4a** was measured under the same photocatalytic reaction conditions, except for the incident light source. Instead of blue LED we used monochromatic light source. The AQE was determined by chemical actinometry<sup>18-21</sup> using monochromatic light of 460 nm and 436 nm wavelengths (These being the important emission peaks of the LED light source). At wavelengths 460 nm and 436 nm the quantum efficiencies of ferrioxalate decomposition are known ( $\Phi_{436} = 1.01$  &  $\Phi_{460} = 0.89$ ).<sup>18</sup>

(a) *Determination of Photon flux at two different wavelengths ( $\lambda = 436$  nm and  $\lambda = 460$  nm):*

A 0.15 M solution of ferrioxalate was prepared by dissolving 0.737 g of potassium ferrioxalate hydrate in 10 mL of 0.05 M H<sub>2</sub>SO<sub>4</sub>. A buffered solution of 1,10 phenanthroline was prepared by dissolving 50 mg of phenanthroline and 11.25 g of sodium acetate in 50 mL of 0.5M H<sub>2</sub>SO<sub>4</sub>. Both solutions were stored in the dark. To determine the photon flux of the spectrophotometer, 2 mL of the ferrioxalate solution was placed in a quartz cuvette and irradiated for 90 seconds at  $\lambda = 460$  nm (emission slit width of 5 nm). After irradiation 0.35 mL of the 1,10 phenanthroline solution was added to it. The aluminium foil wrapped solution was then allowed to rest an hour for complete co-ordination of ferrous ion to phenanthroline. The absorbance of the solution was measured at 510 nm. The same procedure was repeated at monochromatic wavelength  $\lambda = 436$  nm. A non-irradiated sample was also prepared and the absorbance at 510 nm was measured. The no. of moles of ferrous ion (Fe<sup>2+</sup> ions) was calculated using equation 1.

$$Fe^{+2} = \frac{V \cdot \Delta A}{l \cdot \epsilon} \dots\dots\dots(1)$$

Where,  $V$  is the total volume of the solution after addition of phenanthroline (0.00235 L)

$\Delta A$  is the difference in absorbance at 510 nm between the irradiated and non-irradiated solutions.

$l$  is the path length (1 cm)

$\epsilon$  is the molar absorptivity of the ferrioxalate solution at 510 nm (11,100 L mol<sup>-1</sup> cm<sup>-1</sup>)



The photon flux of the spectrophotometer can be calculated using equation 2.

$$\text{photon flux} = \frac{\text{mol Fe}^{+2}}{\Phi \cdot t \cdot f} \quad \dots\dots\dots (2)$$

where,  $\Phi$  = quantum yield for the ferrioxalate actinometer (1.01 for 0.15 M solution at  $\lambda= 436$  nm , 0.89 for 0.15 M solution at  $\lambda= 460$  nm)

The irradiation time,  $t = 90$  seconds

The fraction of light absorbed at wavelength of applied monochromatic light source at  $\lambda= 436$  nm and  $\lambda= 460$  nm ( $f$ ) are 0.997 and 0.993 respectively.

Therefore,

$$\text{Photon flux (at 436 nm)} = \frac{5.14 \times 10^{-7}}{1.01 \times 90 \times 0.997} = 5.72 \times 10^{-9} \text{ Es}^{-1}$$

$$\text{Photon flux (at 460 nm)} = \frac{4.60 \times 10^{-5}}{0.89 \times 90 \times 0.993} = 5.81 \times 10^{-9} \text{ Es}^{-1}$$

(b) Determination of AQE at two different wavelengths ( $\lambda= 436$  nm and  $\lambda= 460$  nm):

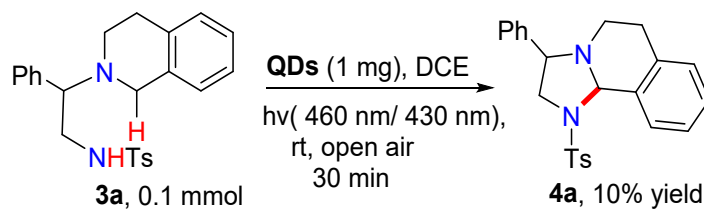

A cuvette was charged with 0.1 mmol (40 mg) of 3a and 1mg CsPbBr<sub>3</sub> QDs in 3 mL DCE as a solvent. A cuvette was then irradiated at two different wavelengths ( $\lambda= 436$  nm and  $\lambda= 460$  nm) for 30 minutes (1800 seconds). The yield of the product formation was determined by <sup>1</sup>H- NMR

spectroscopy using 0.12 mmol 1,3,5 trimethoxybenzene as an internal standard. The yield of the product at both wavelengths ( $\lambda = 436$  nm and  $\lambda = 460$  nm) was 10 % ( $\sim 1 \times 10^{-5}$  mole).

The quantum yield was determined by using equation 3.

$$\Phi = \frac{\text{mole product}}{\text{flux. t.f}} \dots\dots\dots (3)$$

At  $\lambda = 436$  nm,

$$\Phi = \frac{1 \times 10^{-5}}{5.72 \times 10^{-9} \times 1800 \times 0.99} = 0.98$$

At  $\lambda = 460$  nm,

$$\Phi = \frac{1 \times 10^{-5}}{5.81 \times 10^{-9} \times 1800 \times 0.99} = 0.96$$

Table S3: Overview of the calculation of AQE at two different wavelengths (436 and 460 nm)

| Monochromatic light source (wavelength) | Total volume of the reaction solution (L) | Amount of Fe <sup>2+</sup> (mol) | Photon Flux (Einstein s <sup>-1</sup> ) | Product Yield (mol) | Reference quantum yield ( $\Phi_r$ ) | Apparent quantum yield ( $\Phi$ ) |
|-----------------------------------------|-------------------------------------------|----------------------------------|-----------------------------------------|---------------------|--------------------------------------|-----------------------------------|
| 436 nm                                  | 0.00235                                   | $5.14 \times 10^{-7}$            | $5.72 \times 10^{-9}$                   | $1 \times 10^{-5}$  | 1.01                                 | 0.98                              |
| 460 nm                                  | 0.00235                                   | $4.60 \times 10^{-7}$            | $5.81 \times 10^{-9}$                   | $1 \times 10^{-5}$  | 0.89                                 | 0.96                              |

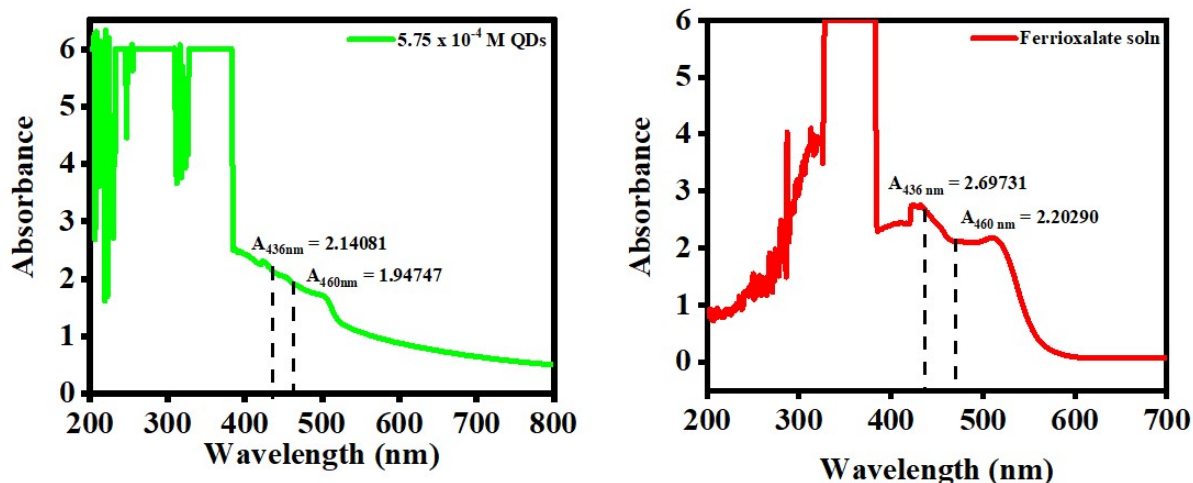

Figure S21: (a) Absorbance of 1mg CsPbBr<sub>3</sub> QDs dispersed in 3 mL DCE ( $5.75 \times 10^{-5}$  M); (b) Absorbance of ferrioxalate actinometer solution.

## 19. NMR spectral data of products:

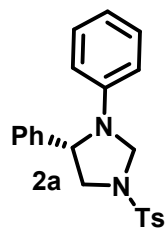

[1]. **3,4-diphenyl-1-tosylimidazolidine**: Following a general procedure, CsPbBr<sub>3</sub> perovskite NCs (1 mg), **1a** (0.1 mmol) and 3 mL 1,2-dichloroethane solvent (DCE) were subjected to irradiation to afford the pure product **2a** (31.02 mg, 0.082 mmol) as a solid in 82% yield. <sup>1</sup>H NMR (400 MHz, CDCl<sub>3</sub>)  $\delta$  7.73 (d,  $J = 8.2$  Hz, 2H), 7.29- 7.25 (m, 5H), 7.17-7.13 (m, 4H), 6.77 (t,  $J = 7.32$  Hz, 1H), 6.42 (d,  $J = 8.2$  Hz, 2H), 5.08 (d,  $J = 5.88$  Hz, 1H), 4.80 (d,  $J = 5.88$  Hz, 1H), 4.57 (dd,  $J = 5.44$  Hz, 7.04 Hz, 1H), 3.96 (dd,  $J = 7.44$  Hz, 10.44 Hz, 1H), 3.50 (dd,  $J = 5.16$  Hz, 10.40 Hz, 1H), 2.43 (s, 3H), <sup>13</sup>C {<sup>1</sup>H} NMR (100 MHz, CDCl<sub>3</sub>)  $\delta$  144.8, 144.3, 140.4, 132.7, 129.9, 129.1, 128.9, 127.8, 127.7, 125.9, 118.2, 113.06, 66.09, 61.4, 55.6, 21.6. (*S*)-3,4-Diphenylimidazolidine (**2a**). 30 mg, yield 79%; HPLC analysis: > 99% ee [Daicel Chiralcel OD-H column], hexane: *i*PrOH = 90:10, flow rate= 1 mL/min,  $\lambda = 254$  nm,  $t_R$  (retention time) = 30.63].

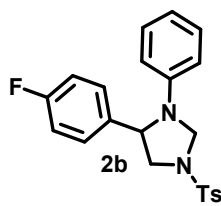

**[2]. 4-(4-fluorophenyl)-3-phenyl-1-tosylimidazoline:** Following a general procedure, CsPbBr<sub>3</sub> perovskite NCs (1 mg), **1b** (0.1 mmol) and 3 mL 1,2-dichloroethane solvent (DCE) were subjected to irradiation to afford the pure product **2b** (29.7 mg, 0.075 mmol) as a solid in 75% yield. <sup>1</sup>H NMR (400 MHz, CDCl<sub>3</sub>) δ 7.71 (d, *J* = 8.08 Hz, 2H), 7.26(d, *J* = 7.96 Hz, 2H), 7.17-7.09 (m, 4H), 6.95 (t, *J* = 8.56 Hz, 2H), 6.77 (t, *J* = 7.32 Hz, 1H), 6.39 (d, *J* = 8.12 Hz, 2H), 5.06 (d, *J* = 5.84 Hz, 1H), 4.75 (d, *J* = 5.8 Hz, 1H), 4.56 (t, *J* = 6.64 Hz, 1H), 3.92 (dd, *J* = 7.4 Hz, 10.32 Hz, 1H), 3.47 (dd, *J* = 4.88 Hz, 10.4 Hz, 1H), 2.43 (s, 3H), <sup>13</sup>C{<sup>1</sup>H} NMR (100 MHz, CDCl<sub>3</sub>) δ 163.4, 160.9, 144.6, 144.4, 136.2, 132.8, 129.9, 129.1, 127.8, 118.4, 115.6, 113.08, 65.9, 60.8, 55.5, 21.5.

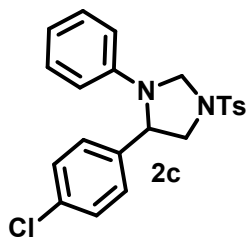

**[3]. 4-(4-chlorophenyl)-3-phenyl-1-tosylimidazolidine:** Following a general procedure, CsPbBr<sub>3</sub> perovskite NCs (1 mg), **1c** (0.1 mmol) and 3 mL 1,2-dichloroethane solvent (DCE) were subjected to irradiation to afford the pure product **2c** (30 mg, 0.073 mmol) as a solid in 73% yield. <sup>1</sup>H NMR (400 MHz, CDCl<sub>3</sub>) δ 7.68 (d, *J* = 8.16 Hz, 2H), 7.28-7.20 (m, 4H), 7.15 (t, *J* = 7.92 Hz, 2H), 7.05 (d, *J* = 8.36 Hz, 2H), 6.77 (t, *J* = 7.32 Hz, 1H), 6.37 (d, *J* = 8.2 Hz, 2H), 5.05 (d, *J* = 5.92 Hz, 1H), 4.75 (d, *J* = 5.92 Hz, 1H), 4.55 (dd, *J* = 4.88, 7.2 Hz, 1H), 3.93 (dd, *J* = 7.4 Hz, 10.52 Hz, 1H), 3.48 (dd, *J* = 4.76 Hz, 10.52 Hz, 1H), 2.43 (s, 3H), <sup>13</sup>C{<sup>1</sup>H} NMR (100 MHz, CDCl<sub>3</sub>) δ 144.7, 144.6, 139.2, 133.5, 133.1, 130, 129.4, 129.2, 127.9, 127.5, 118.7, 113.2, 66.1, 61.0, 55.6, 21.7.

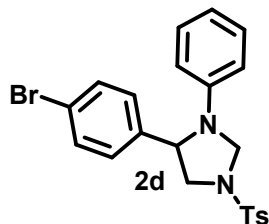

**[4]. 4-(4-bromophenyl)-3-phenyl-1-tosylimidazoline:** Following a general procedure, CsPbBr<sub>3</sub> perovskite NCs (1 mg), **1d** (0.1 mmol) and 3 mL 1,2-dichloroethane solvent (DCE) were subjected to irradiation to afford the pure product **2d** (32.5 mg, 0.071 mmol) as a solid in 71% yield. <sup>1</sup>H NMR (400 MHz, CDCl<sub>3</sub>) δ 7.68 (d, *J* = 8.16 Hz, 2H), 7.36 (d, *J* = 8.36 Hz, 2H), 7.24 (d, *J* = 8.2 Hz, 2H), 7.15 (t, *J* = 8.16 Hz, 2H), 6.99 (d, *J* = 8.36 Hz, 2H), 6.77 (t, *J* = 7.36 Hz, 1H), 6.38 (d, *J* = 8.08 Hz, 2H), 5.06 (d, *J* = 5.96 Hz, 1H), 4.75 (d, *J* = 6 Hz, 1H), 4.54 (dd, *J* = 4.84, 7.2 Hz, 1H), 3.93 (dd, *J* = 7.4 Hz, 10.6 Hz, 1H), 3.48 (dd, *J* = 4.76

Hz, 10.56 Hz, 1H), 2.43 (s, 3H),  $^{13}\text{C}\{^1\text{H}\}$  NMR (100 MHz,  $\text{CDCl}_3$ )  $\delta$  144.49, 144.45, 139.6, 132.9, 131.9, 129.8, 129.2, 127.7, 127.6, 121.45, 118.5, 113.05, 65.9, 60.9, 55.3, 21.5.

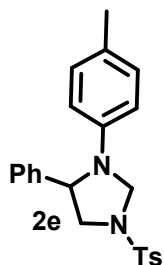

[5]. **4-Phenyl-3-(p-tolyl)-1-tosylimidazolidine:** Following a general procedure,  $\text{CsPbBr}_3$  perovskite NCs (1 mg), **1e** (0.1 mmol) and 3 mL 1,2-dichloroethane solvent (DCE) were subjected to irradiation to afford the pure product **2e** (29.4 mg, 0.075 mmol) as a solid in 75% yield.

$^1\text{H}$  NMR (400 MHz,  $\text{CDCl}_3$ )  $\delta$  7.71 (d,  $J = 7.96$  Hz, 2H), 7.26 (d,  $J = 8.68$  Hz, 5H), 7.13 (d,  $J = 7.16$  Hz, 2H), 6.95 (d,  $J = 8.2$  Hz, 2H), 6.33 (d,  $J = 8.2$  Hz, 2H), 5.06 (d,  $J = 5.72$  Hz, 1H), 4.73 (d,  $J = 5.76$  Hz, 1H), 4.54 (t,  $J = 6.32$  Hz, 1H), 3.97-3.92(m, 1H), 3.44 (dd,  $J = 5.48$  Hz, 10.28 Hz, 1H), 2.43 (s, 3H), 2.22 (s, 3H),  $^{13}\text{C}\{^1\text{H}\}$  NMR (100 MHz,  $\text{CDCl}_3$ )  $\delta$  144.2, 142.7, 140.5, 132.9, 129.8, 129.6, 128.8, 127.8, 127.63, 127.61, 125.9, 113.3, 66.4, 61.7, 55.5, 21.5, 20.2.

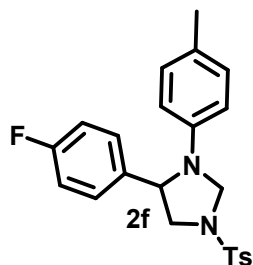

[6]. **4-(4-fluorophenyl)-3-(p-tolyl)-1-tosylimidazolidine:** Following a general procedure,  $\text{CsPbBr}_3$  perovskite NCs (1 mg), **1f** (0.1 mmol) and 3 mL 1,2-dichloroethane solvent (DCE) were subjected to irradiation to afford the pure product **2f** (31.6 mg, 0.077 mmol) as a solid in 77% yield.

$^1\text{H}$  NMR (400 MHz,  $\text{CDCl}_3$ )  $\delta$  7.71 (d,  $J = 8.12$  Hz, 2H), 7.27 (d,  $J = 8.08$  Hz, 2H), 7.11-7.07 (m, 2H), 6.97-6.91 (m, 4H), 6.32 (d,  $J = 8.32$  Hz, 2H), 5.06 (d,  $J = 5.76$  Hz, 1H), 4.69 (d,  $J = 5.76$  Hz, 1H), 4.54 (t,  $J = 6.16$  Hz, 1H), 3.91 (dd,  $J = 7.48$  Hz, 10.32 Hz, 1H), 3.43 (dd,  $J = 5.16$  Hz, 10.36 Hz, 1H), 2.43 (s, 3H), 2.22 (s, 3H),  $^{13}\text{C}\{^1\text{H}\}$  NMR (100 MHz,  $\text{CDCl}_3$ )  $\delta$  163.3, 160.9, 144.3, 142.5, 136.2, 133, 129.8, 129.6, 127.8, 127.5, 115.8, 113.4, 66.3, 61, 55.5, 21.5, 20.2.

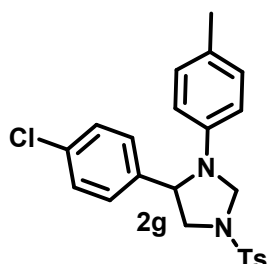

[7]. **4-(4-chlorophenyl)-3-(p-tolyl)-1-tosylimidazolidine:** Following a general procedure,  $\text{CsPbBr}_3$  perovskite NCs (1 mg), **1g** (0.1 mmol) and 3 mL 1,2-dichloroethane solvent (DCE) were subjected to irradiation to afford the pure product **2g** (31.6 mg, 0.074 mmol) as a solid in 74% yield.

$^1\text{H}$  NMR (400 MHz,  $\text{CDCl}_3$ )  $\delta$  7.68 (d,  $J = 8.24$  Hz, 2H), 7.28-7.19 (m, 4H), 7.27 (d,  $J = 8.36$  Hz, 2H), 6.95 (d,  $J = 8.2$  Hz, 2H), 6.30 (d,  $J = 8.4$  Hz, 2H),

5.05 (d,  $J = 8.4$  Hz, 1H), 4.70 (d,  $J = 5.84$  Hz, 1H), 4.54-4.51 (m, 1H), 3.95-3.90 (m, 1H), 3.44 (dd,  $J = 5.04$  Hz, 10.48 Hz, 1H), 2.43 (s, 3H), 2.22 (s, 3H),  $^{13}\text{C}\{^1\text{H}\}$  NMR (100 MHz,  $\text{CDCl}_3$ )  $\delta$  144.3, 142.4, 139.1, 133.3, 133.0, 129.8, 129.7, 128.9, 127.9, 127.7, 127.3, 113.3, 66.2, 61.1, 55.3, 21.5, 20.2.

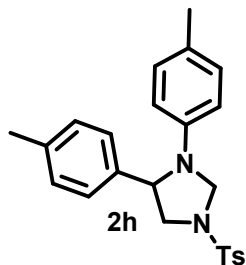

**[8]. 3, 4-di-*p*-tolyl-1-tosylimidazolidine:** Following a general procedure,  $\text{CsPbBr}_3$  perovskite NCs (1 mg), **1h** (0.1 mmol) and 3 mL 1,2-dichloroethane solvent (DCE) were subjected to irradiation to afford the pure product **2h**

(29.7 mg, 0.073 mmol) as a solid in 73% yield.  $^1\text{H}$  NMR (400 MHz,  $\text{CDCl}_3$ )  $\delta$  7.70 (d,  $J = 8.2$  Hz, 2H), 7.28-7.24 (m, 2H), 7.06-6.99 (m, 4H), 6.93 (d,  $J = 8.28$  Hz, 2H), 6.32 (d,  $J = 8.4$  Hz, 2H), 5.02 (d,  $J = 5.76$  Hz, 1H), 4.71 (d,  $J = 5.8$  Hz, 1H), 4.49 (t,  $J = 6.32$  Hz, 1H), 3.91 (dd,  $J = 7.36$  Hz, 10.24 Hz, 1H), 3.40 (dd,  $J = 5.6$  Hz, 10.28 Hz, 1H), 2.42 (s, 3H), 2.31 (s, 3H), 2.21 (s, 3H),  $^{13}\text{C}\{^1\text{H}\}$  NMR (100 MHz,  $\text{CDCl}_3$ )  $\delta$  144.1, 142.7, 137.4, 137.2, 133.03, 129.7, 129.57, 129.50, 125.8, 113.3, 66.4, 61.5, 55.6, 21.5, 21.06, 20.2.

**[9]. 3-(4-chlorophenyl)-4-Phenyl-1-tosylimidazolidine:** Following a general procedure,  $\text{CsPbBr}_3$  perovskite NCs (1 mg), **1i** (0.1 mmol) and 3 mL 1,2-dichloroethane solvent (DCE)

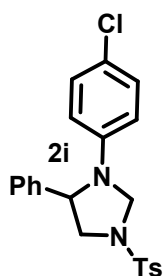

were subjected to irradiation to afford the pure product **2i** (29.8 mg, 0.072 mmol) as a solid in 72% yield.  $^1\text{H}$  NMR (400 MHz,  $\text{CDCl}_3$ )  $\delta$  7.70 (d,  $J = 8.12$  Hz, 2H), 7.27-7.24 (m, 5H), 7.11-7.05 (m, 4H), 6.28 (d,  $J = 8.88$  Hz, 2H), 5.0 (d,  $J = 6.08$  Hz, 1H), 4.77 (d,  $J = 6.12$  Hz, 1H), 4.47 (t,  $J = 6.48$  Hz, 1H), 3.98 (dd,  $J = 7.36$ , 10.6 Hz, 1H), 3.44 (dd,  $J = 5.56$ , 10.6 Hz, 1H), 2.42 (s, 3H),  $^{13}\text{C}\{^1\text{H}\}$  NMR (100 MHz,  $\text{CDCl}_3$ )  $\delta$  144.4, 143.3, 139.7, 132.7, 129.9, 129.0, 128.9, 127.89, 127.80, 125.85, 123.2, 114.1, 66.0, 61.5, 55.6, 21.5.

**[10]. 3,4-bis(4-chlorophenyl)-1-tosylimidazolidine:** Following a general procedure,  $\text{CsPbBr}_3$  perovskite NCs (1 mg), **1j** (0.1 mmol) and 3 mL 1,2-dichloroethane solvent

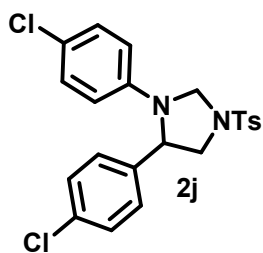

(DCE) were subjected to irradiation to afford the pure product **2j** (32.7 mg, 0.073 mmol) as a solid in 73% yield.  $^1\text{H}$  NMR (400 MHz,  $\text{CDCl}_3$ )  $\delta$  7.67 (d,  $J = 8.12$  Hz, 2H), 7.25-7.21 (m, 4H), 7.08 (d,  $J = 8.8$  Hz, 2H), 7.02 (d,

$J = 8.28$  Hz, 2H), 6.27 (d,  $J = 8.84$  Hz, 2H) 5.0 (d,  $J = 6.08$  Hz, 1H), 4.73 (d,  $J = 6.12$  Hz, 1H), 4.50-4.47 (m, 1H), 3.96 (dd,  $J = 8.16, 10.6$  Hz, 1H), 3.44 (dd,  $J = 5.04, 10.8$  Hz, 1H), 2.42 (s, 3H),  $^{13}\text{C}\{^1\text{H}\}$  NMR (100 MHz,  $\text{CDCl}_3$ )  $\delta$  144.6, 143.3, 138.6, 133.8, 133.5, 130.1, 129.3, 129.2, 127.9, 127.4, 123.8, 114.3, 66.1, 61.2, 55.6, 21.8.

**[11]. 4-Phenyl-3-(*m*-tolyl)-1-tosylimidazolidine:** Following a general procedure,  $\text{CsPbBr}_3$  perovskite NCs (1 mg), **1k** (0.1 mmol) and 3 mL 1,2-dichloroethane solvent (DCE) were subjected

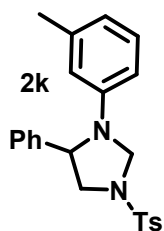

to irradiation to afford the pure product **2k** (29.0mg, 0.074 mmol) as a solid in 74% yield.  $^1\text{H}$  NMR (400 MHz,  $\text{CDCl}_3$ )  $\delta$  7.73 (d,  $J = 8.12$  Hz, 2H), 7.27 (d,  $J = 6.08$  Hz, 5H), 7.17-7.15 (m, 2H), 7.03 (d,  $J = 7.84$  Hz, 1H), 6.60 (d,  $J = 7.36$  Hz, 1H), 6.27-6.20 (m, 2H), 5.06 (d,  $J = 5.84$  Hz, 1H), 4.78 (d,  $J = 5.8$  Hz, 1H), 4.60-4.57 (m, 1H), 3.93 (dd,  $J = 7.48, 10.28$  Hz, 1H), 3.49 (dd,  $J = 5.08, 10.28$  Hz, 1H), 2.43 (s, 3H), 2.26 (s, 3H),  $^{13}\text{C}\{^1\text{H}\}$  NMR (100 MHz,  $\text{CDCl}_3$ )  $\delta$  144.8, 144.3, 140.6, 138.9, 132.7, 129.9, 128.9, 128.8, 127.8, 127.6, 125.9, 119.2, 113.7, 110.3, 66.1, 61.4, 55.5, 21.7, 21.6.

**[12]. 4-(4-bromophenyl)-3-(*m*-tolyl)-1-tosylimidazolidine:** Following a general procedure,  $\text{CsPbBr}_3$  perovskite NCs (1 mg), **1l** (0.1 mmol) and 3 mL

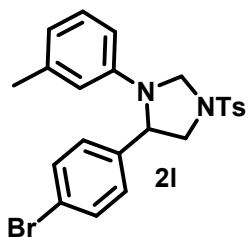

1,2-dichloroethane solvent (DCE) were subjected to irradiation to afford the pure product **2l** (35.3 mg, 0.075 mmol) as a solid in 75% yield.  $^1\text{H}$  NMR (400 MHz,  $\text{CDCl}_3$ )  $\delta$  7.67 (d,  $J = 8.20$  Hz, 2H), 7.36 (d,  $J = 8.32$  Hz, 2H), 7.28-7.23 (m, 2H), 7.04-6.96 (m, 3H), 6.60 (d,  $J = 7.48$  Hz, 1H), 6.21-6.15

(m, 2H), 5.04 (d,  $J = 5.88$  Hz, 1H), 4.73 (d,  $J = 5.92$  Hz, 1H), 4.56-4.53 (m, 1H), 3.90 (dd,  $J = 7.44, 10.52$  Hz, 1H), 3.47 (dd,  $J = 4.60, 10.48$  Hz, 1H), 2.43 (s, 3H), 2.24 (s, 3H),  $^{13}\text{C}\{^1\text{H}\}$  NMR (100 MHz,  $\text{CDCl}_3$ )  $\delta$  144.5, 144.3, 139.7, 139.1, 131.9, 129.8, 129.1, 127.7, 127.6, 121.4, 119.5, 113.7, 110.3, 65.9, 60.9, 55.2, 21.7, 21.6.

**[13]. 3-phenyl-1-tosyl-1,2,3,5,6,10b-hexahydroimidazo(2,1-a)isoquinoline:** Following a general procedure,  $\text{CsPbBr}_3$  perovskite NCs (1 mg), **3a** (0.1 mmol) and 3 mL 1,2-dichloroethane

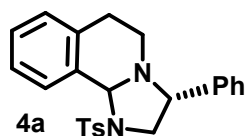

solvent (DCE) were subjected to irradiation to afford the pure product **4a** (33.2 mg, 0.082 mmol) as a solid in 82% yield.  $^1\text{H}$  NMR (400 MHz,  $\text{CDCl}_3$ )  $\delta$  7.99 (d,  $J = 7.72$  Hz, 1H), 7.87 (d,  $J = 8.2$  Hz, 2H), 7.42 (d,  $J = 8.12$  Hz,

2H), 7.36 (t,  $J = 7.56$  Hz, 1H), 7.29-7.21 (m, 4H), 7.09 (d,  $J = 7.56$  Hz, 1H), 6.91-6.89 (m, 2H), 5.97 (s, 1H), 4.13 (t,  $J = 8.12$  Hz, 1H), 3.72-3.70 (m, 1H), 3.21 (t,  $J = 9.44$  Hz, 1H), 3.17-3.10 (m, 1H), 2.98-2.90 (m, 1H), 2.77 (dd,  $J = 5.44$  Hz, 13.76 Hz, 1H), 2.56 (s, 3H), 2.4 (dd,  $J = 4.44$  Hz, 16.88 Hz, 1H),  $^{13}\text{C}\{^1\text{H}\}$  NMR (100 MHz,  $\text{CDCl}_3$ )  $\delta$  143.8, 138.7, 134.8, 134.1, 133.9, 129.7, 129.03, 128.6, 128.4, 128.1, 127.56, 127.52, 127.04, 76.3, 60.7, 55.5, 41.4, 21.6, 21.3. **(3R)-3-phenyl-1-tosyl-1,2,3,4,5,6,10b-hexahydroimidazo[2,1-a]isoquinoline 4a'**. 32.5 mg, yield 80%; HPLC analysis: > 99% ee [Daicel Chiralcel OD-H column], hexane : *i*PrOH = 90:10, flow rate= 1 mL/min,  $\lambda = 254$  nm,  $t_{\text{R}}$  (retention time) = 9.88].

**[14].3-(4-chlorophenyl)-1-tosyl-1,2,3,5,6,10b-hexahydroimidazo(2,1-a)isoquinoline:**

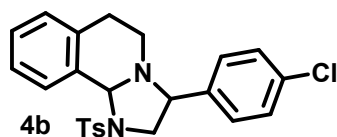

Following a general procedure,  $\text{CsPbBr}_3$  perovskite NCs (1 mg), **3b** (0.1 mmol) and 3 mL 1,2-dichloroethane solvent (DCE) were subjected to irradiation to afford the pure product **4b** (29.4 mg, 0.067 mmol) as a solid in 67% yield.  $^1\text{H}$  NMR (400 MHz,  $\text{CDCl}_3$ )  $\delta$  7.95 (d,  $J = 7.72$  Hz, 1H), 7.84 (d,  $J = 8.2$  Hz, 2H), 7.41 (d,  $J = 8.12$  Hz, 2H), 7.34 (t,  $J = 7.4$  Hz, 1H), 7.26 (t,  $J = 7.4$  Hz, 1H), 7.19 (d,  $J = 8.36$  Hz, 2H), 7.08 (d,  $J = 7.56$  Hz, 1H), 6.80 (d,  $J = 8.44$  Hz, 2H), 5.96 (s, 1H), 4.09 (t,  $J = 8.08$  Hz, 1H), 3.69 (dd,  $J = 7.6, 10.32$  Hz, 1H), 3.17-3.09 (m, 2H), 2.95-2.86 (m, 1H), 2.72 (dd,  $J = 4.88, 14.08$  Hz, 1H), 2.55 (s, 3H), 2.42 (dd,  $J = 4.44$  Hz, 17.08 Hz, 1H),  $^{13}\text{C}\{^1\text{H}\}$  NMR (100 MHz,  $\text{CDCl}_3$ )  $\delta$  143.9, 137.4, 134.5, 134.06, 133.8, 133.7, 129.7, 128.9, 128.7, 128.4, 128.3, 127.6, 127.09, 76.3, 60.1, 55.2, 41.4, 21.6, 21.2.

**[15]. 3-(*p*-tolyl)-1-tosyl-1,2,3,5,6,10b-hexahydroimidazo(2,1-a)isoquinoline:**

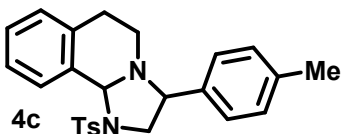

Following a general procedure,  $\text{CsPbBr}_3$  perovskite NCs (1 mg), **3c** (0.1 mmol) and 3 mL 1,2-dichloroethane solvent (DCE) were subjected to irradiation to afford the pure product **4c** (33.9 mg, 0.081 mmol) as a solid in 81% yield.  $^1\text{H}$  NMR (400 MHz,  $\text{CDCl}_3$ )  $\delta$  7.95 (d,  $J = 7.72$  Hz, 1H), 7.87 (d,  $J = 8.16$  Hz, 2H), 7.42 (d,  $J = 8.04$  Hz, 2H), 7.35 (t,  $J = 7.4$  Hz, 1H), 7.28-7.25 (m, 1H), 7.09- 7.04 (m, 3H), 6.80 (d,  $J = 7.92$  Hz, 2H), 5.95 (s, 1H), 4.09 (t,  $J = 8.12$  Hz, 1H), 3.69 (dd,  $J = 7.4, 9.96$  Hz, 1H), 3.18 (t,  $J = 9.56$  Hz, 1H), 3.14-3.08 (m, 1H), 2.97-2.88 (m, 1H), 2.76 (dd,  $J = 5.04, 14.08$  Hz, 1H), 2.56 (s, 3H), 2.40 (dd,  $J = 4.40$  Hz, 17.08 Hz, 1H),  $^{13}\text{C}\{^1\text{H}\}$  NMR (100 MHz,  $\text{CDCl}_3$ )  $\delta$  144.0, 138.1, 135.6, 135.02, 134.2, 134.1, 129.9, 129.5, 129.2, 128.6, 127.7, 127.6, 127.2, 76.5, 60.6, 55.7, 41.5, 21.8, 21.5, 21.3.



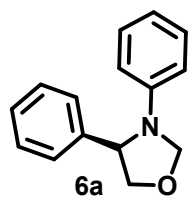

**[16]. 3,4 diphenyloxazolidine:** Following a general procedure, CsPbBr<sub>3</sub> perovskite NCs (1 mg), **5a** (0.1 mmol) and 3 mL 1,2-dichloroethane solvent (DCE) were subjected to irradiation to afford the pure product **6a** (16.2 mg, 0.072 mmol) as a solid in 72% yield. <sup>1</sup>H NMR (400 MHz, CDCl<sub>3</sub>) δ 7.55- 7.45 (m, 5H), 7.38 (t, *J* = 7.56 Hz, 2H), 6.96 (d, *J* = 7.2 Hz, 1H), 6.69 (d, *J* = 8.12 Hz, 2H), 5.50 (d, *J* = 1.52 Hz, 1H), 5.20 (d, *J* = 1.4 Hz, 1H), 4.86 (dd, *J* = 4.48, 6.48 Hz, 1H), 4.54 (t, *J* = 7.92 Hz, 1H), 4.15 (dd, *J* = 4.32, 8.40 Hz, 1H), <sup>13</sup>C{<sup>1</sup>H} NMR (100 MHz, CDCl<sub>3</sub>) δ 145.2, 141.7, 129.5, 129.1, 127.8, 126.4, 117.9, 113, 82.9, 75.8, 61.8. **(S)-3,4-Diphenyloxazolidine 6a'**. 16 mg, yield 71%; HPLC analysis: > 99% ee [Daicel Chiralcel OD-H column], hexane : *i*PrOH = 90:10, flow rate= 1 mL/min, λ = 254 nm, *t*<sub>R</sub> (retention time) = 5.76 min (major) and 10.6 min (minor)].

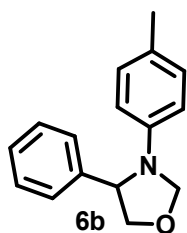

**[17]. 4-phenyl-3-(p-tolyl)oxazolidine:** Following a general procedure, CsPbBr<sub>3</sub> perovskite NCs (1 mg), **5b** (0.1 mmol) and 3 mL 1,2-dichloroethane solvent (DCE) were subjected to irradiation to afford the pure product **6b** (18.2 mg, 0.076 mmol) as a solid in 76% yield. <sup>1</sup>H NMR (400 MHz, CDCl<sub>3</sub>) δ 7.48- 7.39 (m, 5H), 7.13-7.11 (m, 2H), 6.56-6.53 (m, 2H), 5.43 (d, *J* = 1.96 Hz, 1H), 5.12 (d, *J* = 1.96 Hz, 1H), 4.77-4.78 (m, 1H), 4.50 (t, *J* = 7.0 Hz, 1H), 4.09-4.05 (m, 1H), 2.37 (s, 3H), <sup>13</sup>C{<sup>1</sup>H} NMR (100 MHz, CDCl<sub>3</sub>) δ 143.1, 141.7, 129.8, 128.9, 127.6, 126.9, 126.3, 113.0, 83.2, 75.7, 62.04, 20.4.

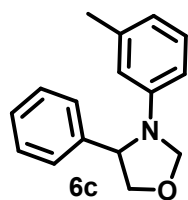

**[18]. 4-phenyl-3-(m-tolyl)oxazolidine:** Following a general procedure, CsPbBr<sub>3</sub> perovskite NCs (1 mg), **5c** (0.1 mmol) and 3 mL 1,2-dichloroethane solvent (DCE) were subjected to irradiation to afford the pure product **6c** (17.94 mg, 0.075 mmol) as a solid in 75% yield. <sup>1</sup>H NMR (400 MHz, CDCl<sub>3</sub>) δ 7.59- 7.47 (m, 6H), 7.30 (t, *J* = 7.76 Hz, 1H), 6.83 (d, *J* = 7.44 Hz, 1H), 6.57-6.53 (m, 2H), 5.53 (d, *J* = 2.24 Hz, 1H), 5.22 (d, *J* = 2.2 Hz, 1H), 4.88 (dd, *J* = 4.28, 6.72 Hz, 1H), 4.55 (t, *J* = 8.12 Hz, 1H), 4.15 (dd, *J* = 4.2, 8.36 Hz, 1H), 2.50 (s, 3H), <sup>13</sup>C{<sup>1</sup>H} NMR (100 MHz, CDCl<sub>3</sub>) δ 145.3, 141.9, 139.1, 129.4, 129.05, 127.7, 126.4, 118.9, 113.6, 110.3, 83.0, 61.8, 22.04.

**[19]. 4-phenyl-3-(m-tolyl)oxazolidine:** Following a general procedure, CsPbBr<sub>3</sub> perovskite NCs (1 mg), **5d** (0.1 mmol) and 3 mL 1,2-dichloroethane solvent (DCE) were subjected

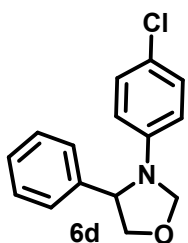

to irradiation to afford the pure product **6d** (18.1 mg, 0.07 mmol) as a solid in 70% yield.  $^1\text{H}$  NMR (400 MHz,  $\text{CDCl}_3$ )  $\delta$  7.39- 7.28 (m, 5H), 7.13 (d,  $J = 8.84$  Hz, 2H), 6.40 (d,  $J = 8.84$  Hz, 2H), 5.30 (d,  $J = 2.20$  Hz, 1H), 5.01 (d,  $J = 2.20$  Hz, 1H), 4.67 (dd,  $J = 4.68, 6.60$  Hz, 1H), 4.45- 4.42 (m, 1H), 3.98 (dd,  $J = 4.52, 8.44$  Hz, 1H),  $^{13}\text{C}\{^1\text{H}\}$  NMR (100 MHz,  $\text{CDCl}_3$ )  $\delta$  143.4, 140.8, 129.0, 127.7, 126.1, 122.6, 113.8, 82.7, 75.8, 61.7, 29.7.

## 20. HPLC chromatograms

DAD1 A, Sig=254,4 Ref=360,100 (DSBG\_ROPSBD12 2021-03-02 18-39-07\BG\_SBD\_01\_ROP\_RAC1.D)

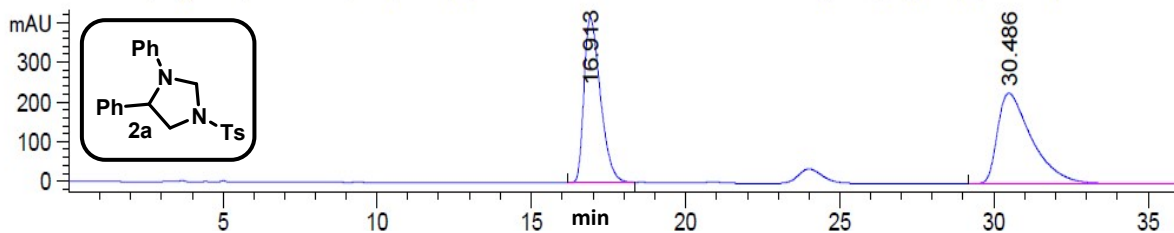

| Peak | Retention Time( min) | Type | Area (%) |
|------|----------------------|------|----------|
| 1    | 16.916               | BV   | 43.78    |
| 2    | 30.486               | BBA  | 49.80    |

DAD1 A, Sig=254,4 Ref=360,100 (DSBG\_ROPSBD12 2021-03-02 17-29-22\BG\_SBD\_01\_ROP\_RAC1.D)

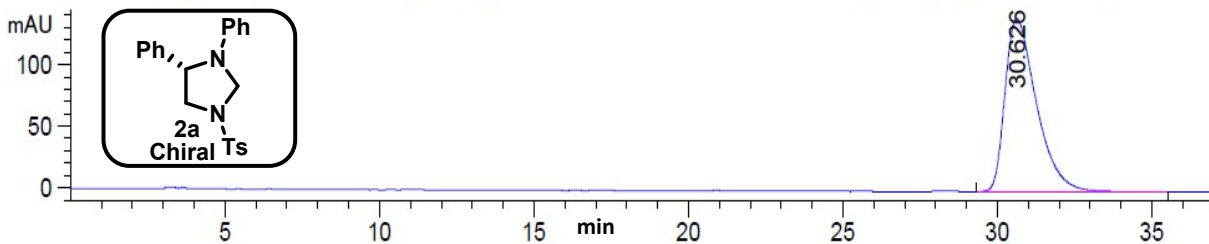

| Peak | Retention Time ( min) | Type | Area (%) |
|------|-----------------------|------|----------|
| 1    | 30.626                | BB   | 99.99    |

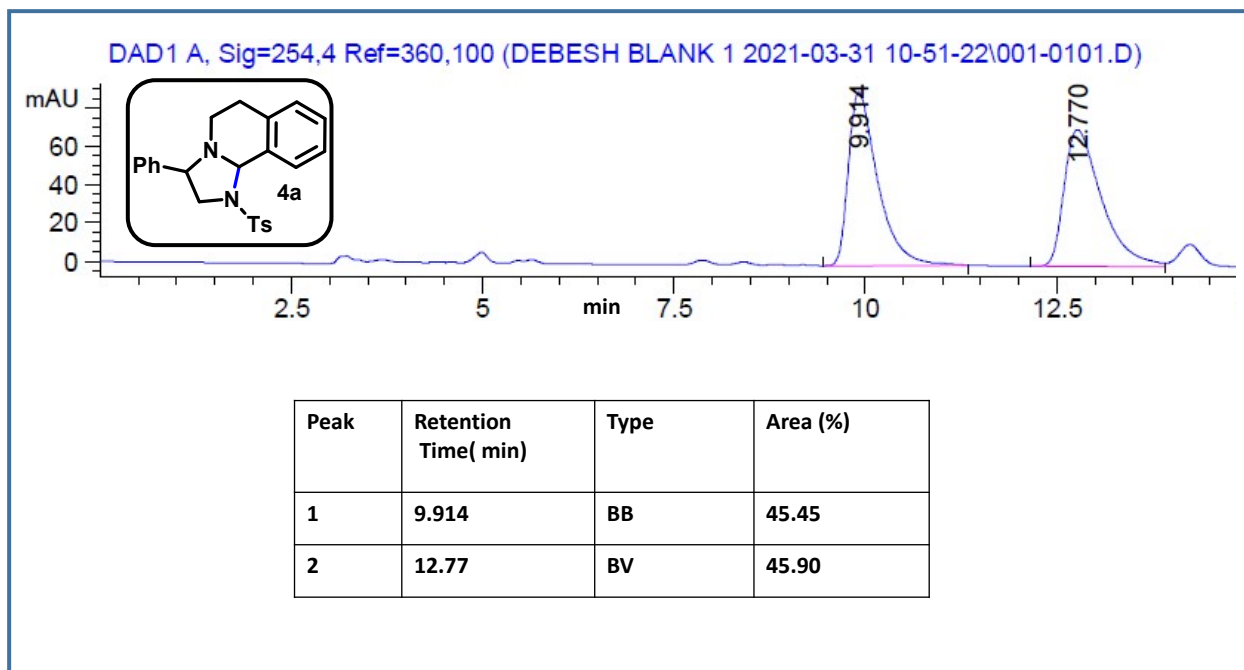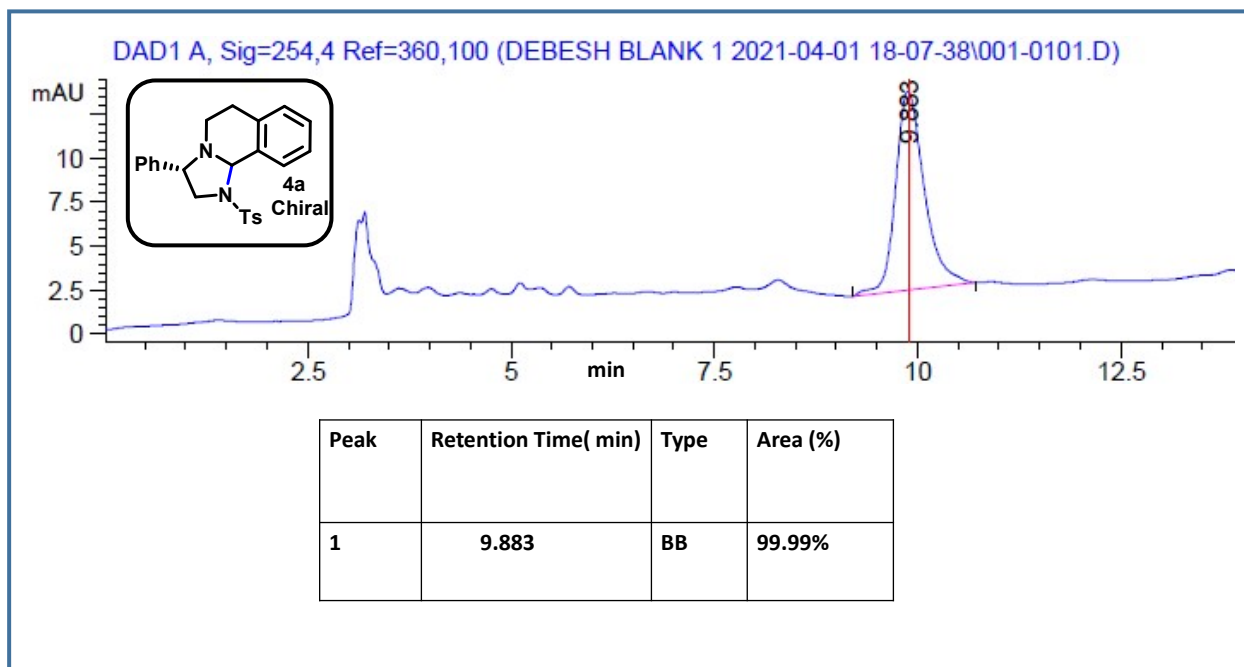

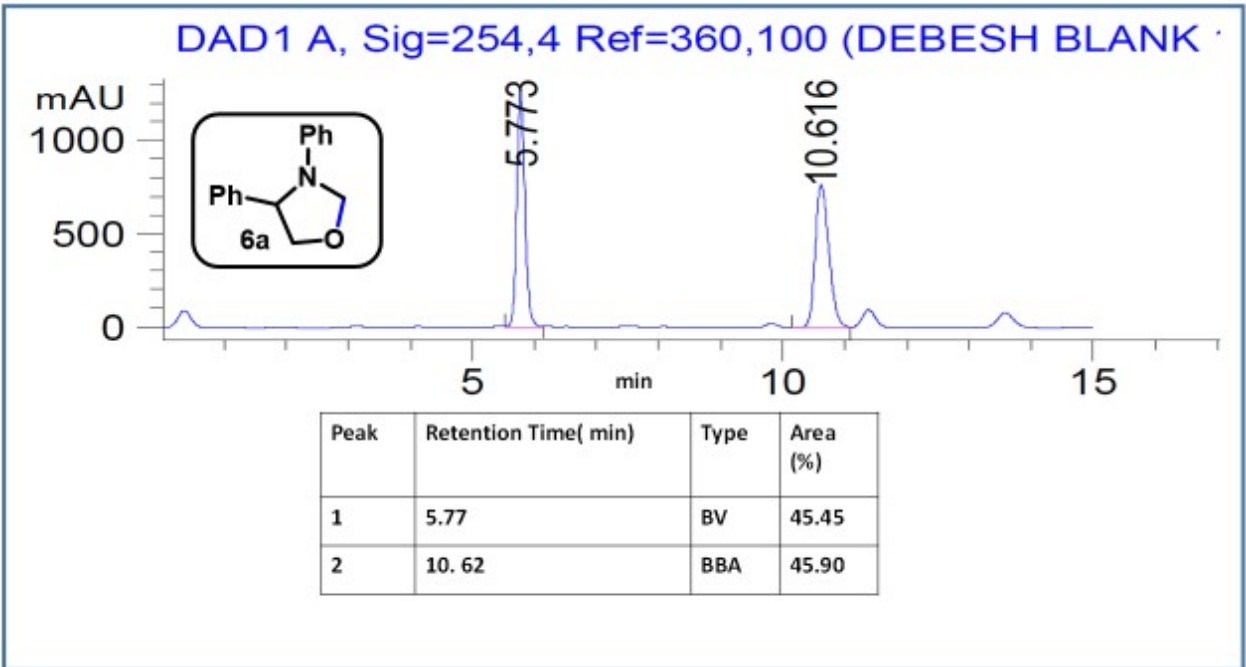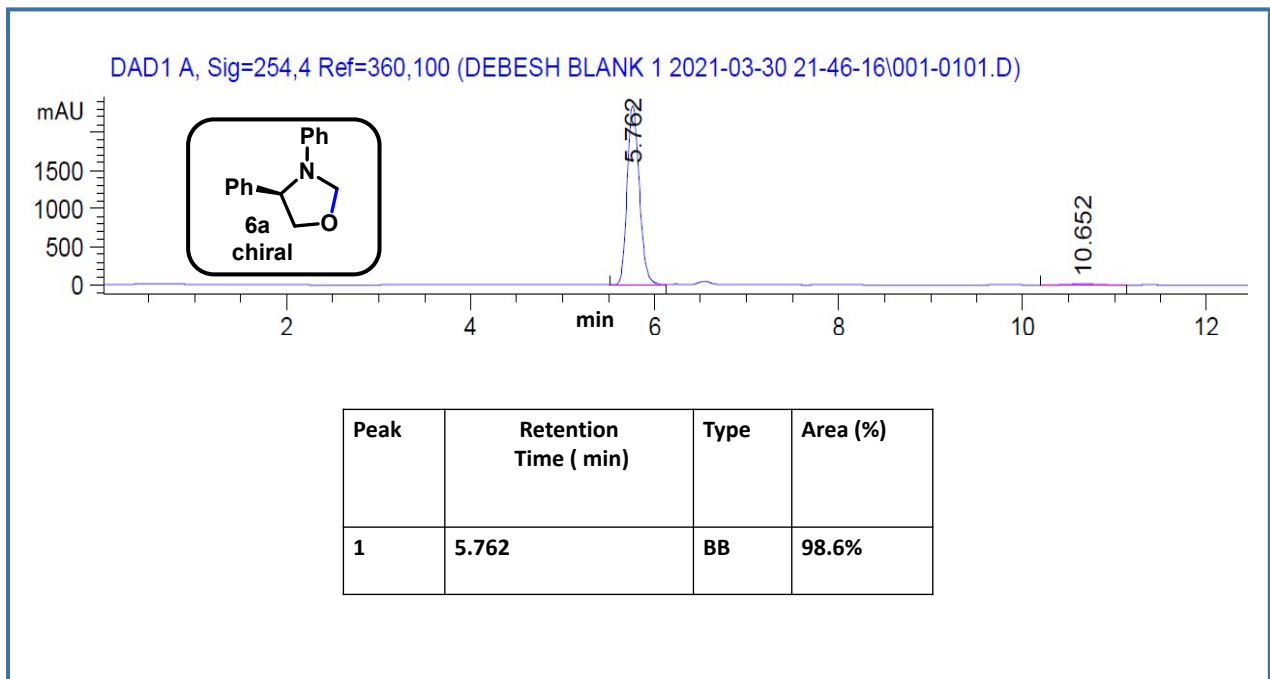

## 21. Copies of NMR and CMR spectra of products:

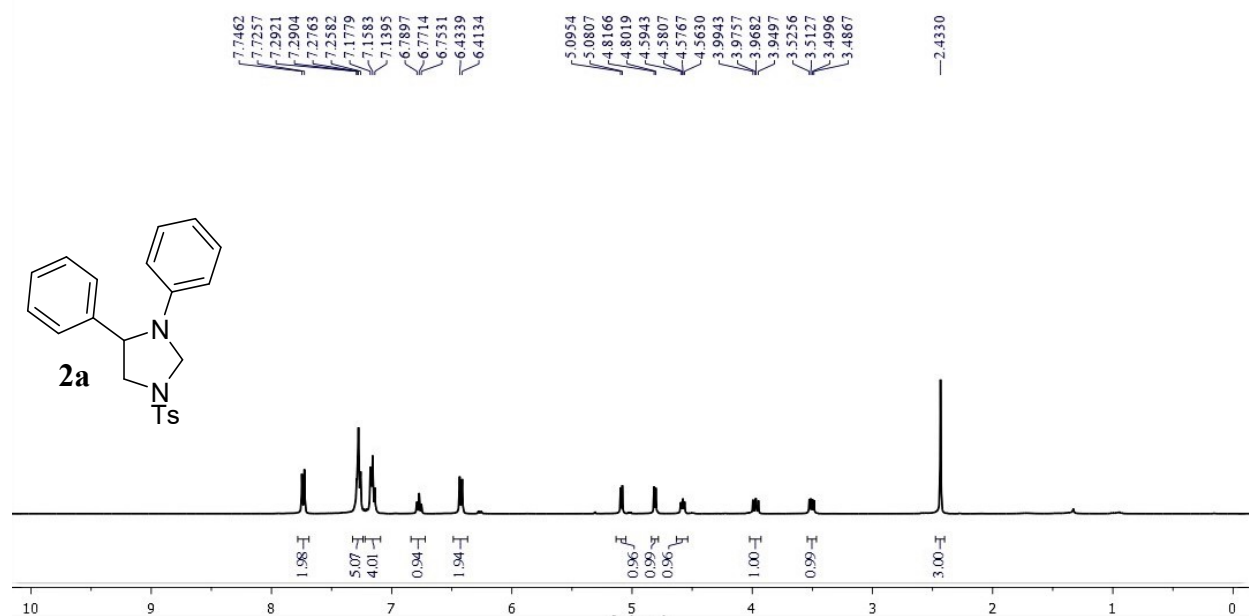

Figure S22.  $^1\text{H NMR}$  of **2a** (400 MHz,  $\text{CDCl}_3$ )

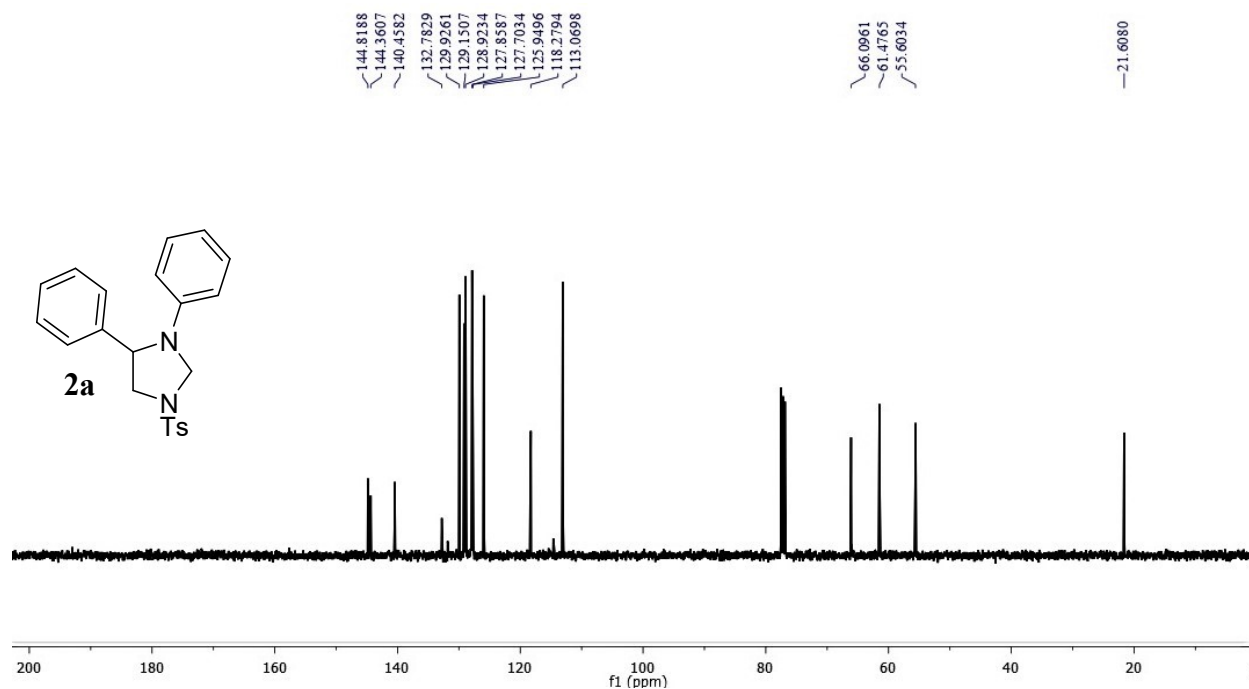

Figure S23.  $^{13}\text{C}\{^1\text{H}\}$  NMR of **2a** (100 MHz,  $\text{CDCl}_3$ )

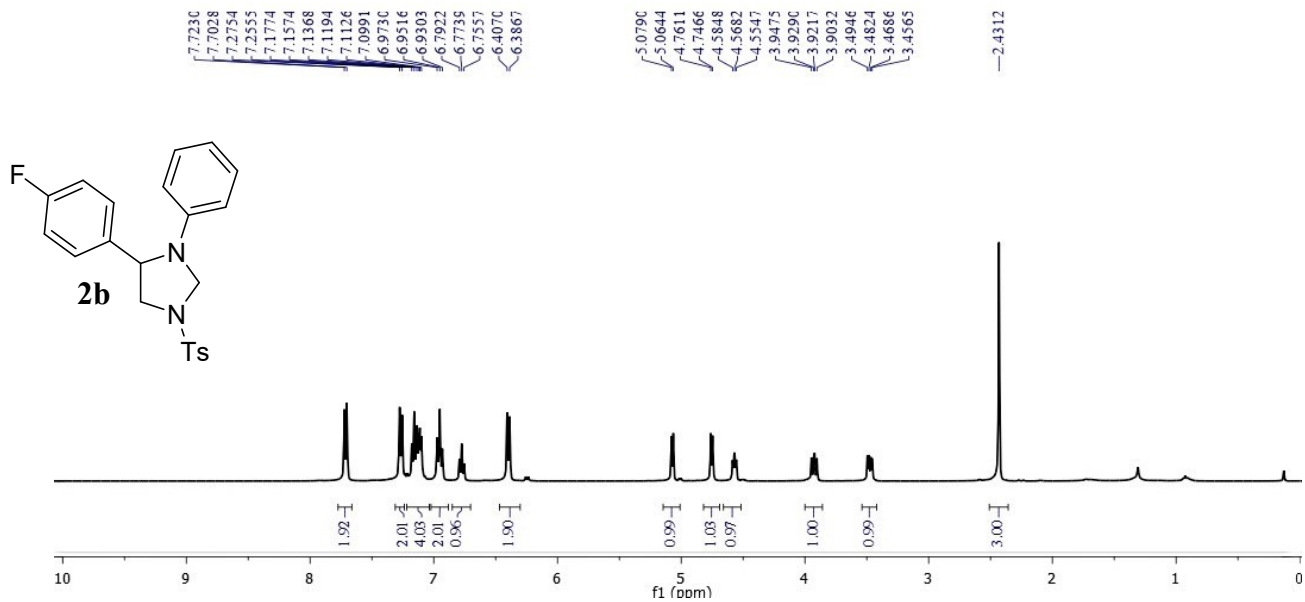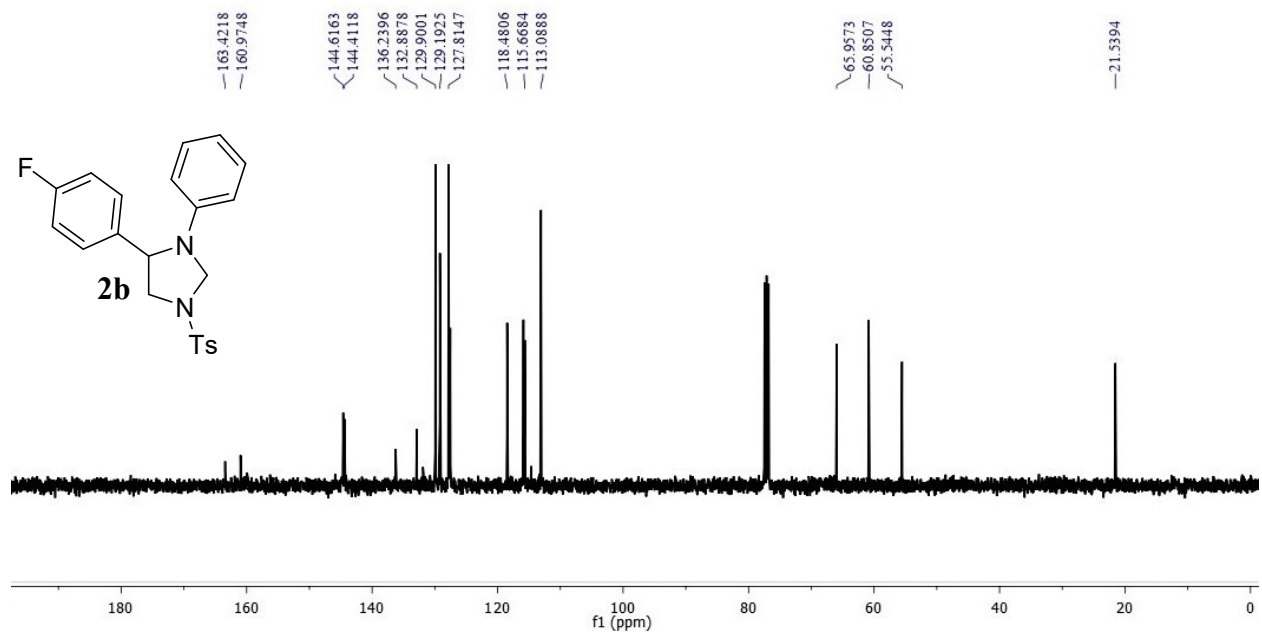

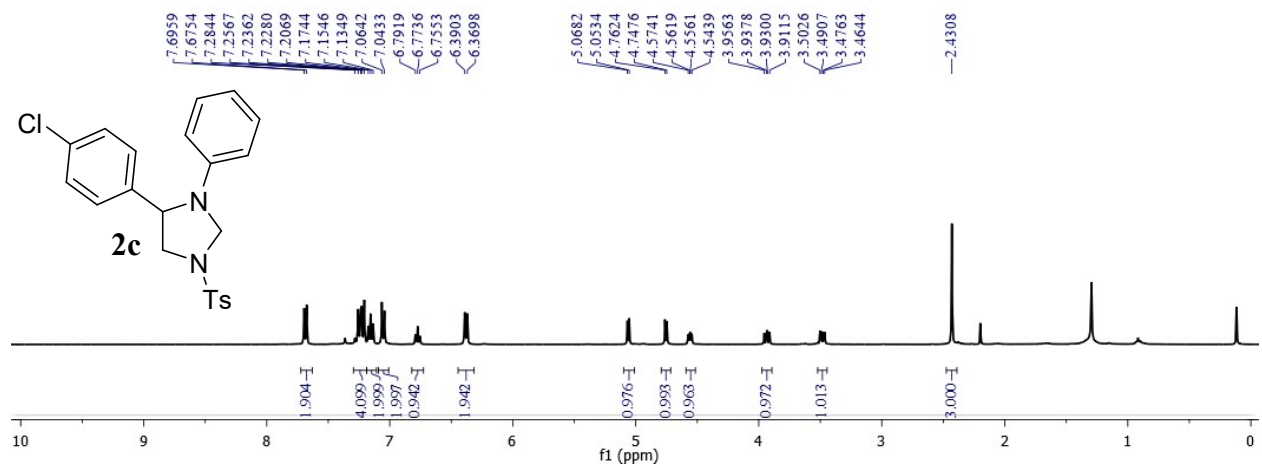

Figure S26. <sup>1</sup>H NMR of **2c** (400 MHz, CDCl<sub>3</sub>)

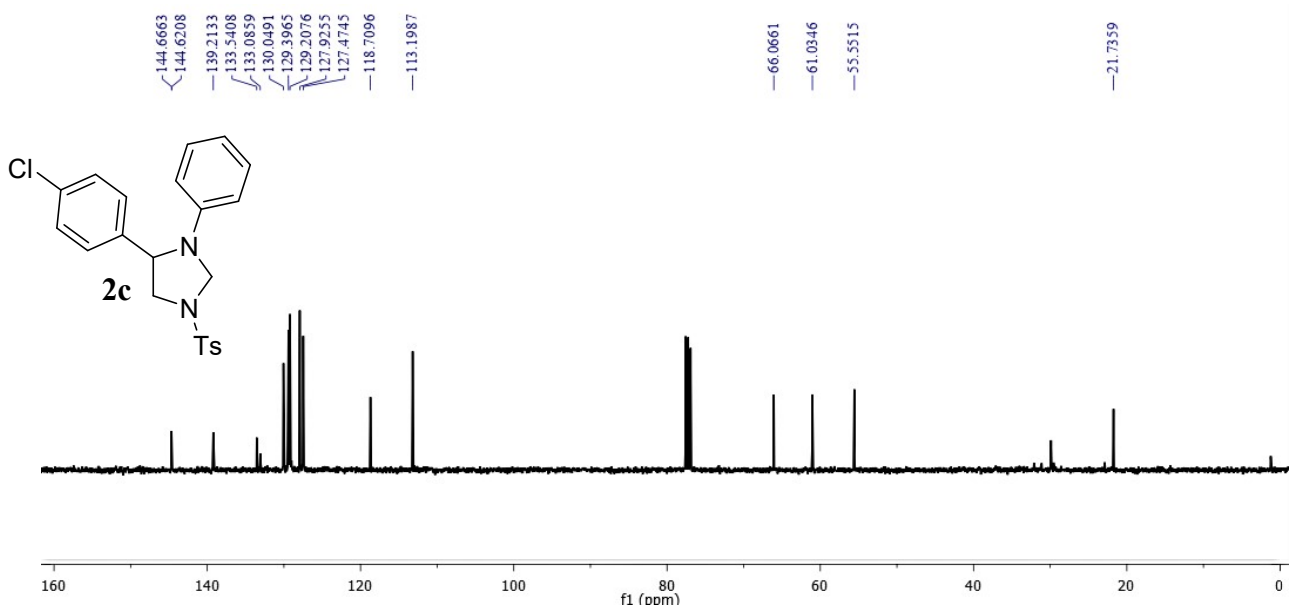

Figure S27. <sup>13</sup>C{<sup>1</sup>H} NMR of **2c** (100 MHz, CDCl<sub>3</sub>)



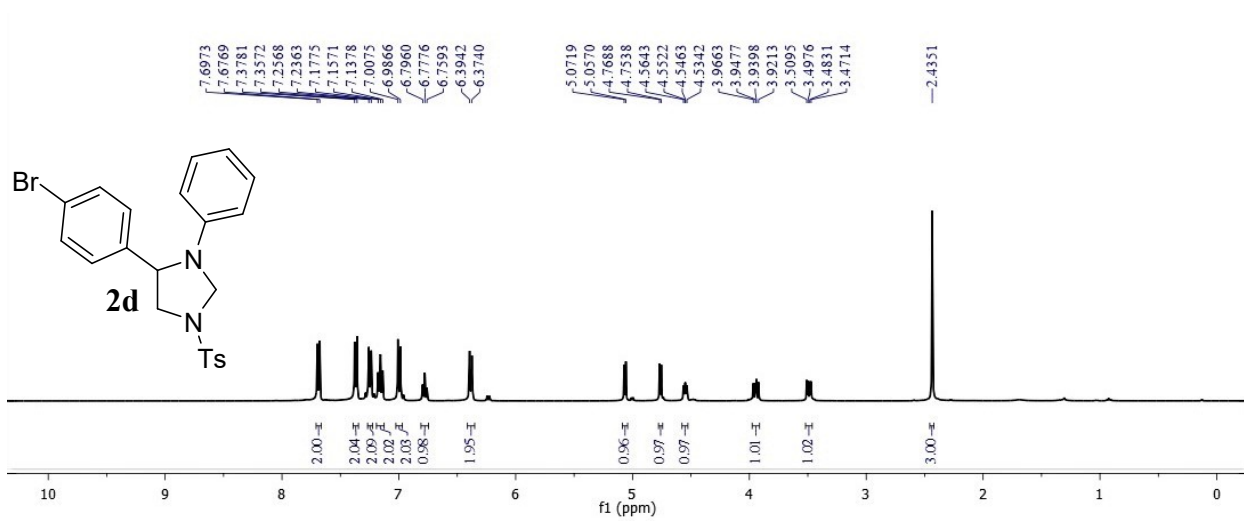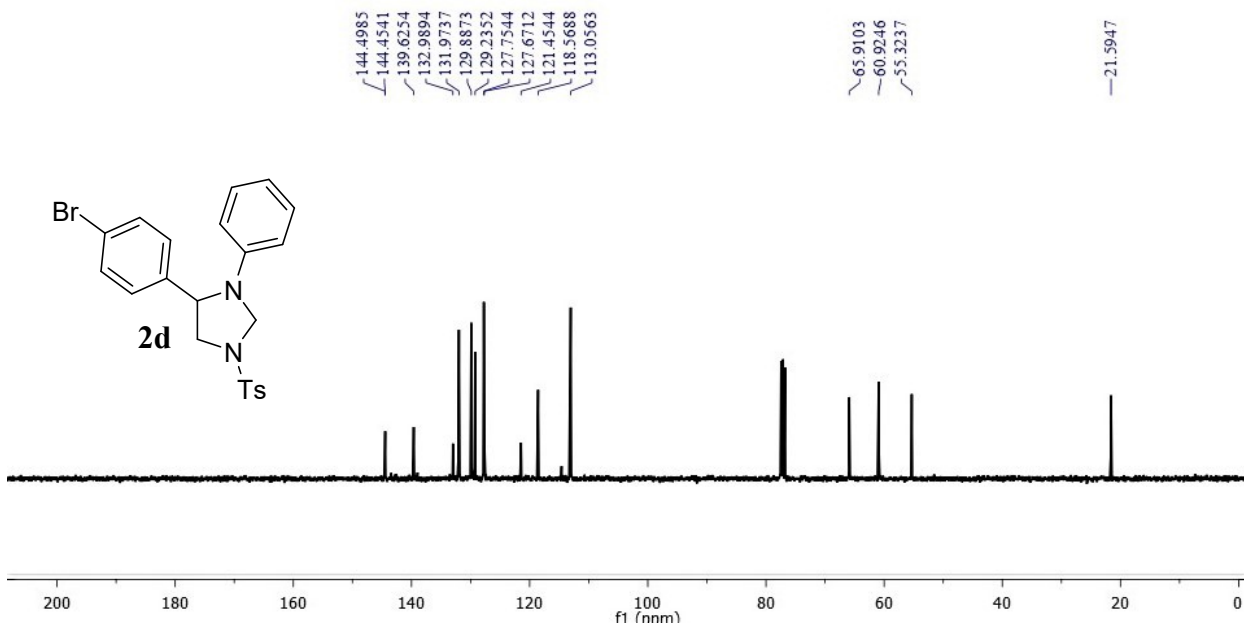

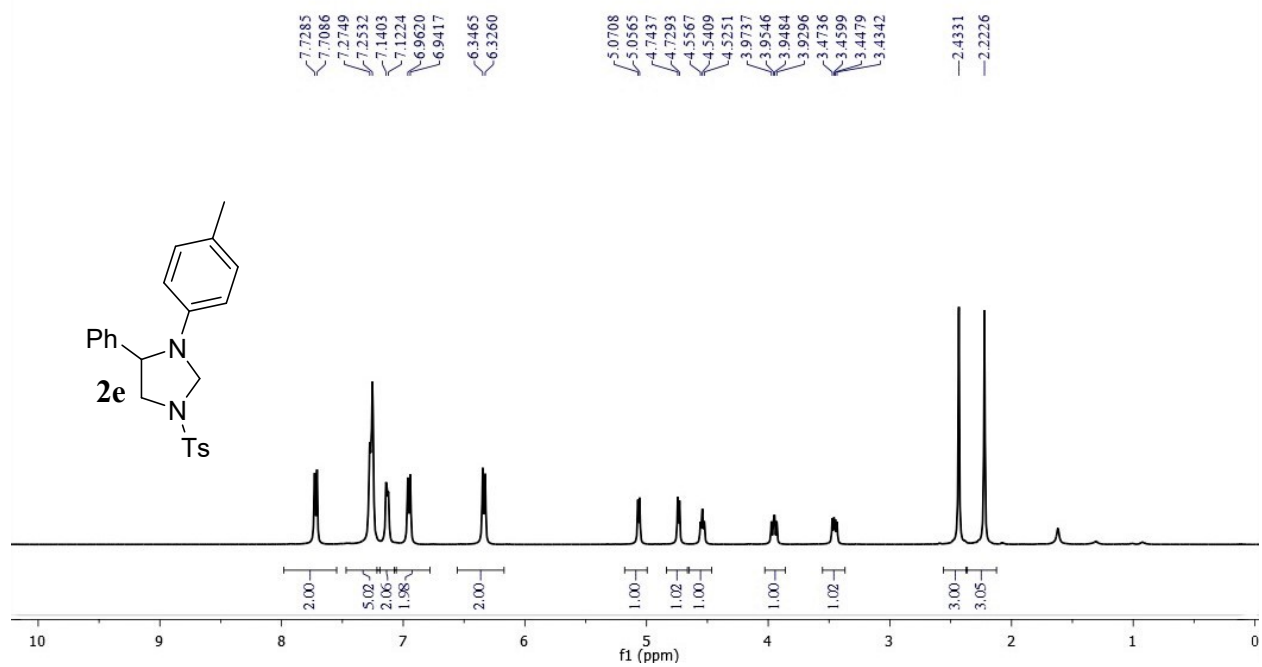

Figure S30. <sup>1</sup>H NMR of **2e** (400 MHz, CDCl<sub>3</sub>)

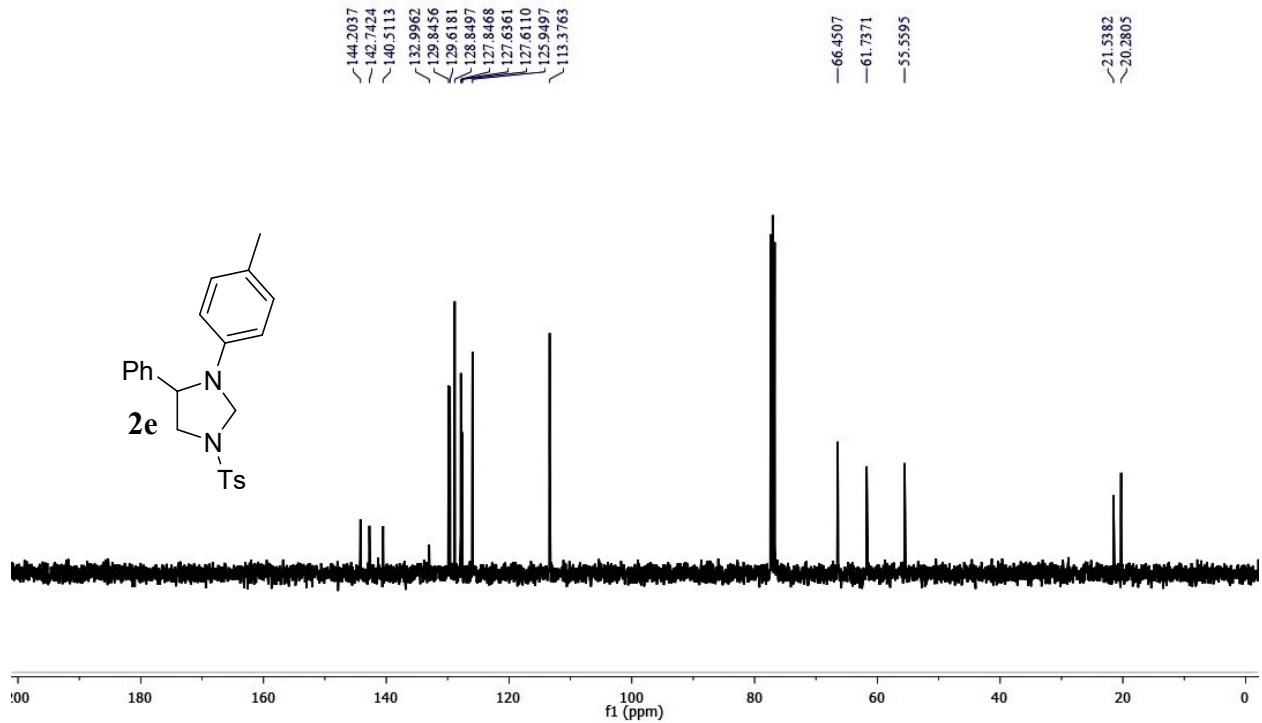

Figure S31. <sup>13</sup>C{<sup>1</sup>H} NMR of **2e** (100 MHz, CDCl<sub>3</sub>)

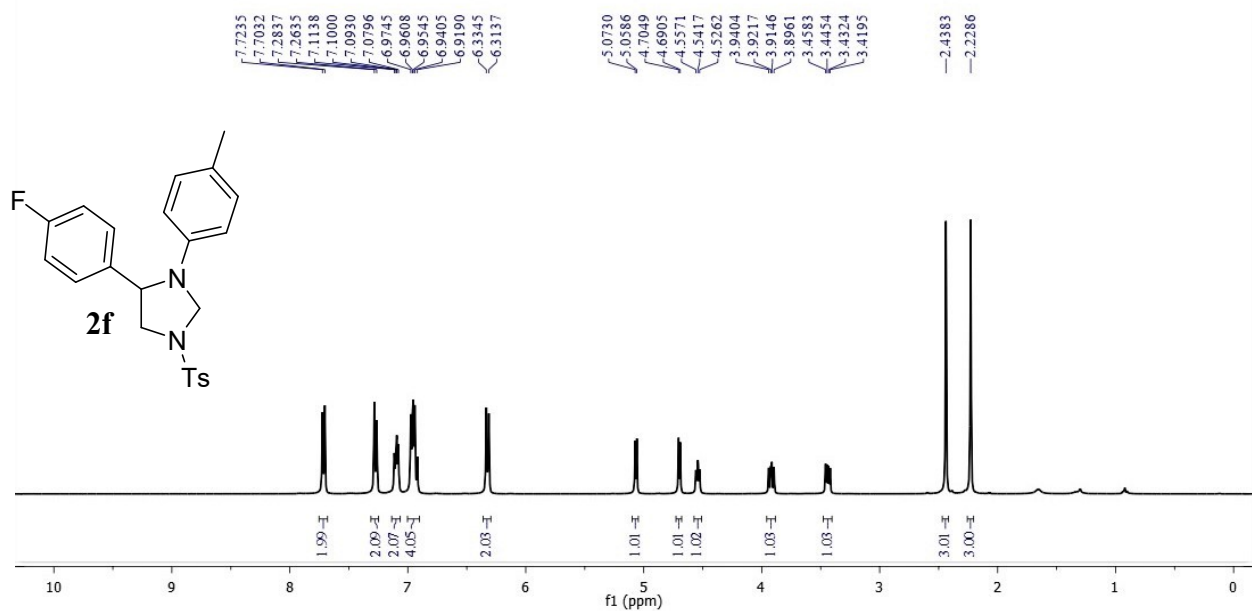

**Figure S32.  $^1\text{H}$  NMR of **2f** (400 MHz,  $\text{CDCl}_3$ )**

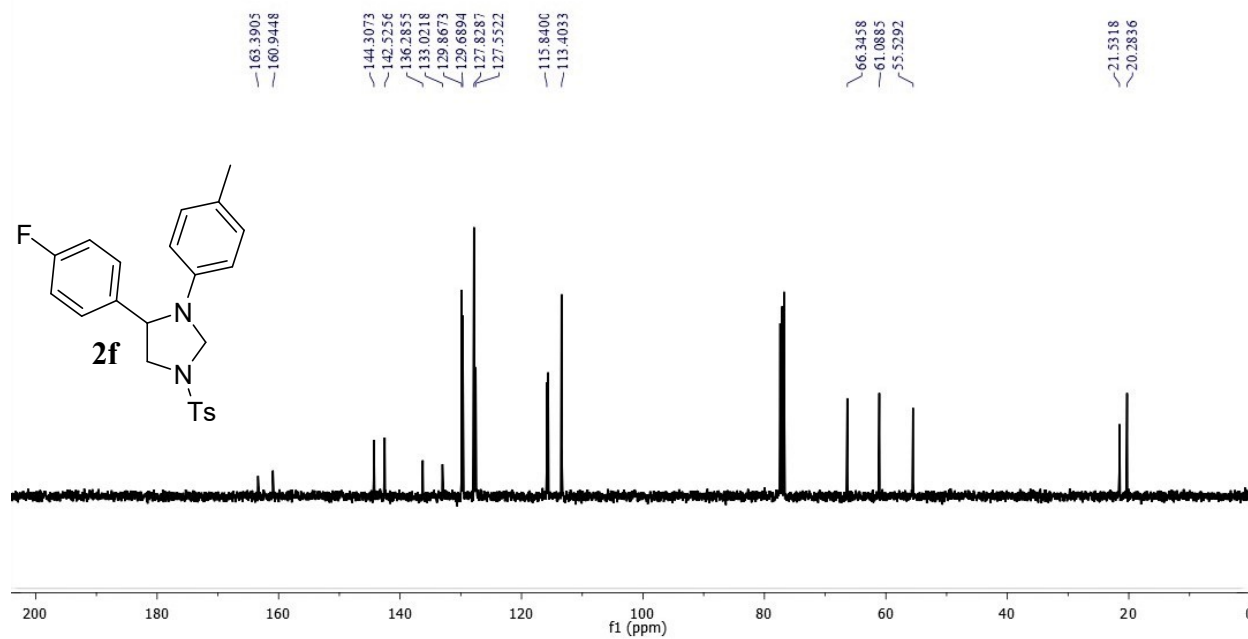

**Figure S33.  $^{13}\text{C}\{^1\text{H}\}$  NMR of **2f** (100 MHz,  $\text{CDCl}_3$ )**

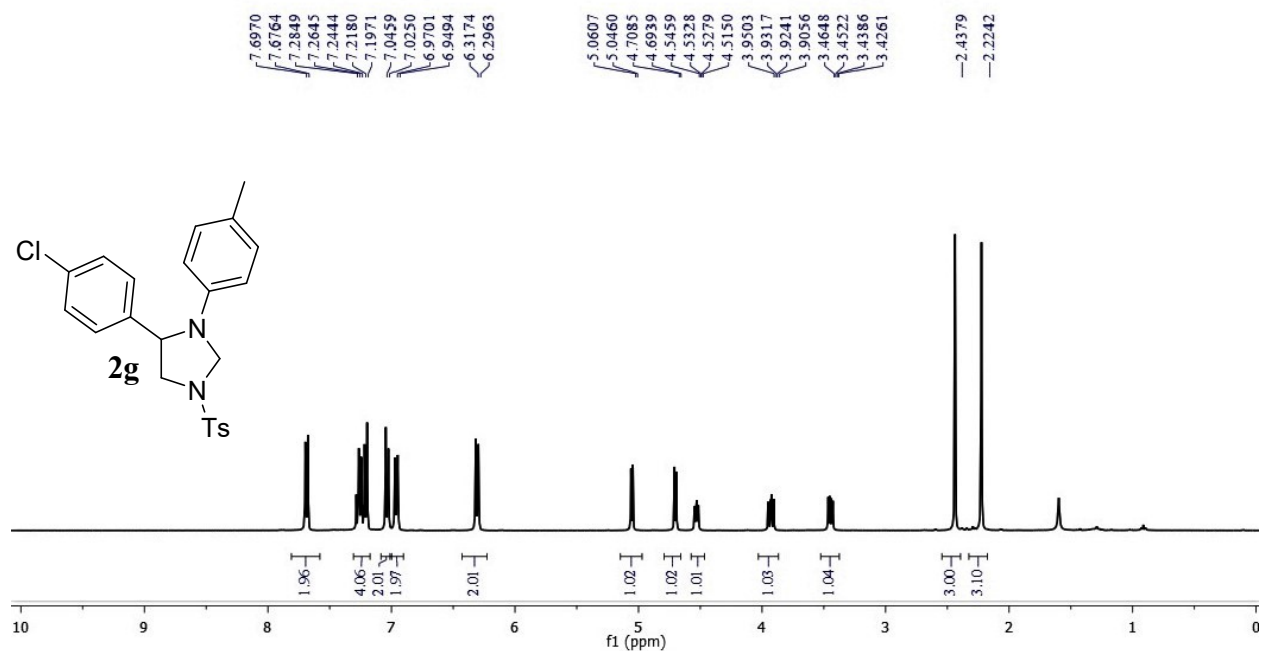

Figure S34. <sup>1</sup>H NMR of **2g** (400 MHz, CDCl<sub>3</sub>)

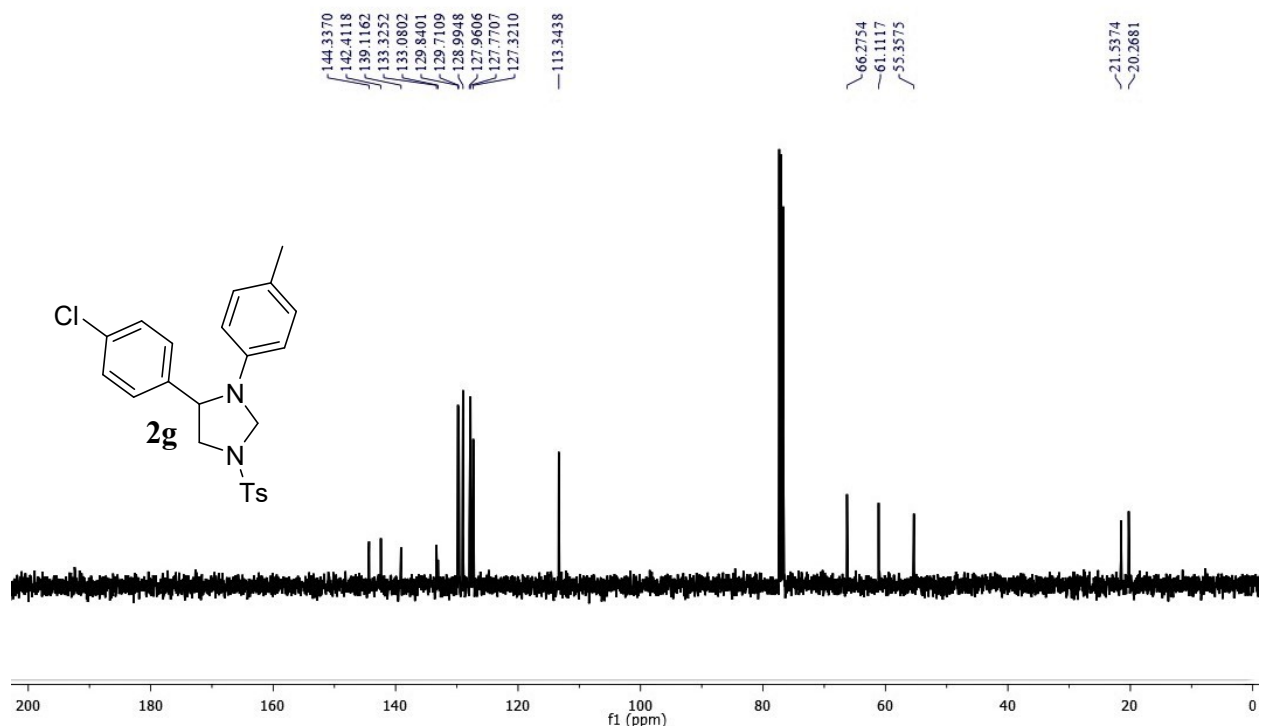

Figure S35. <sup>13</sup>C{<sup>1</sup>H} NMR of **2g** (100 MHz, CDCl<sub>3</sub>)

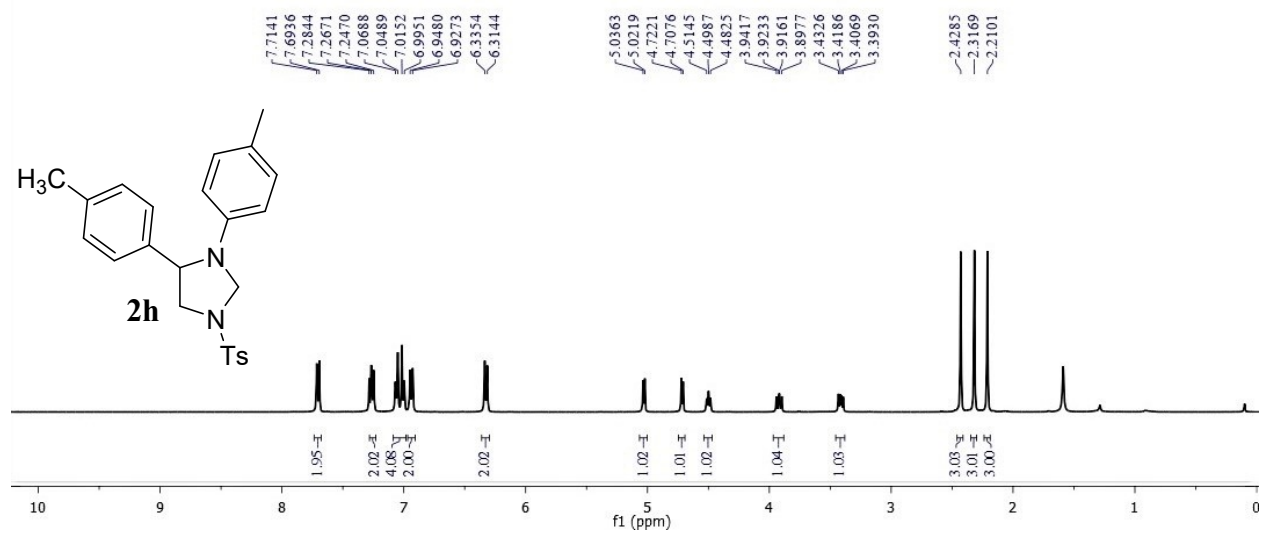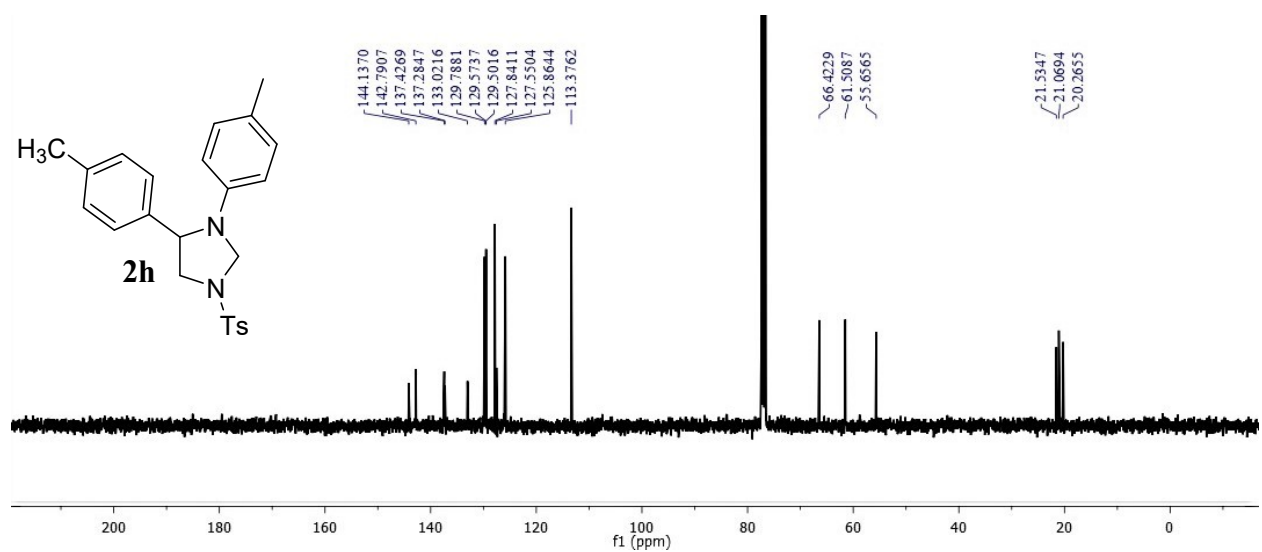

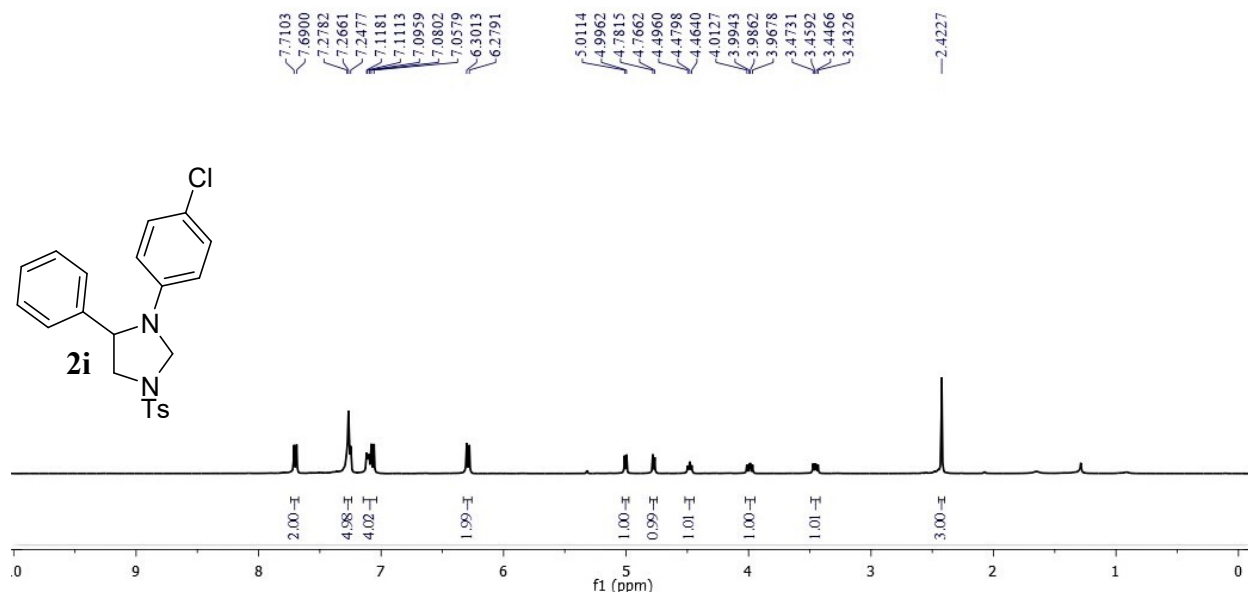

**Figure S38.**  $^1\text{H}$  NMR of **2i** (400 MHz,  $\text{CDCl}_3$ )

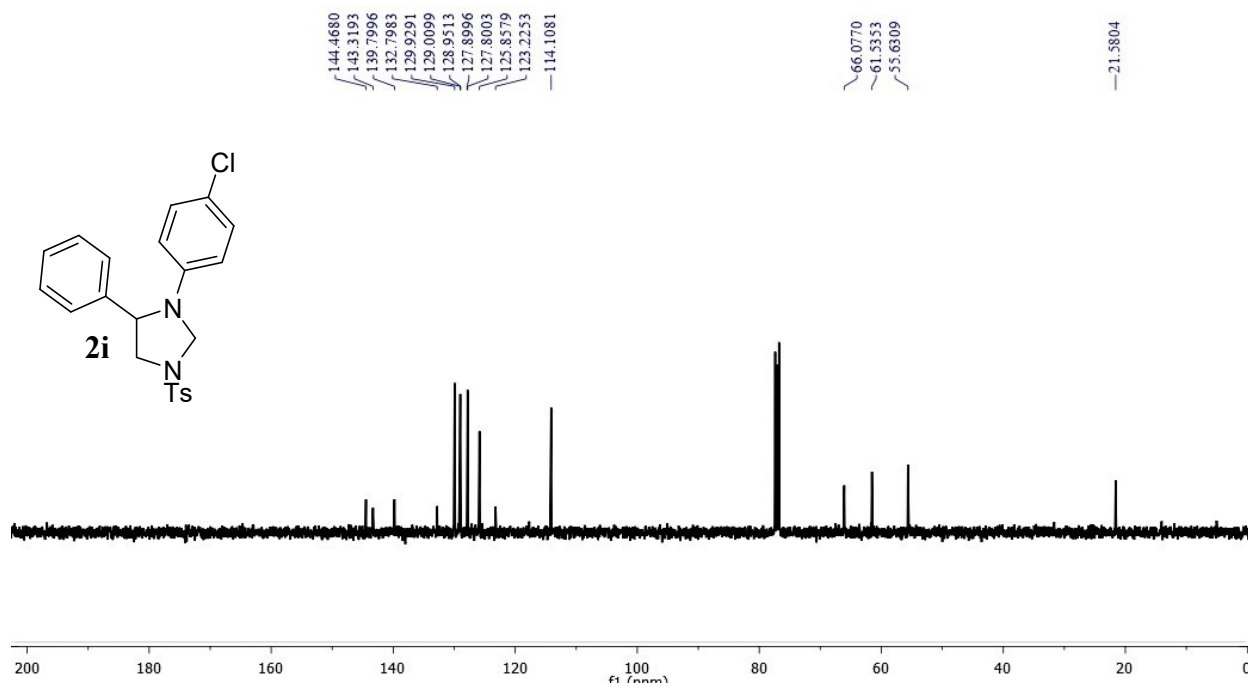

**Figure S39.**  $^{13}\text{C}\{^1\text{H}\}$  NMR of **2i** (100 MHz,  $\text{CDCl}_3$ )

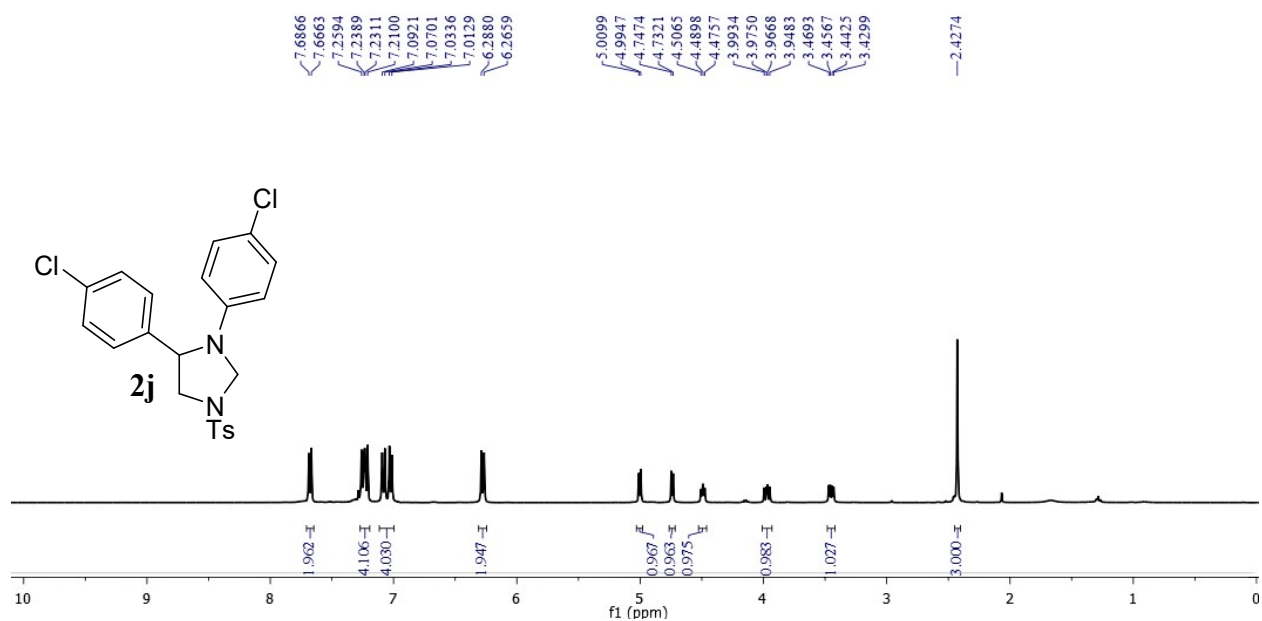

**Figure S40.  $^1\text{H}$  NMR of **2j** (100 MHz,  $\text{CDCl}_3$ )**

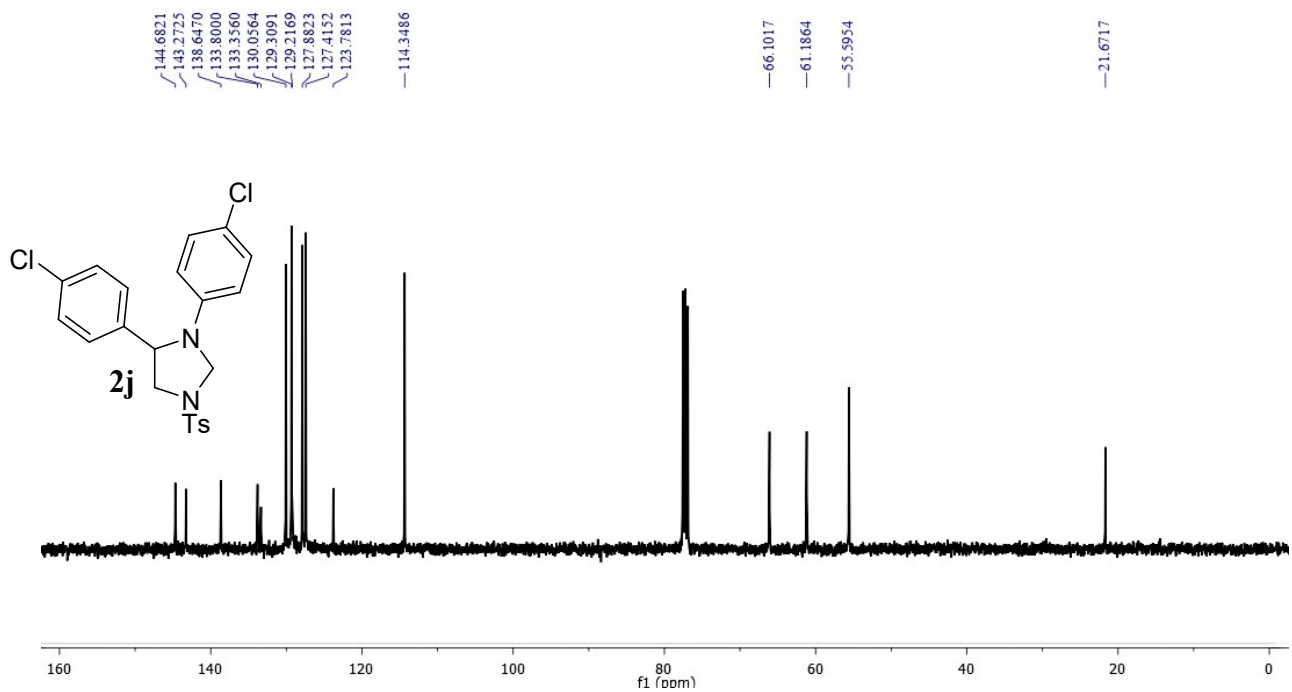

**Figure S41.  $^{13}\text{C}$  NMR of **2j** (100 MHz,  $\text{CDCl}_3$ )**

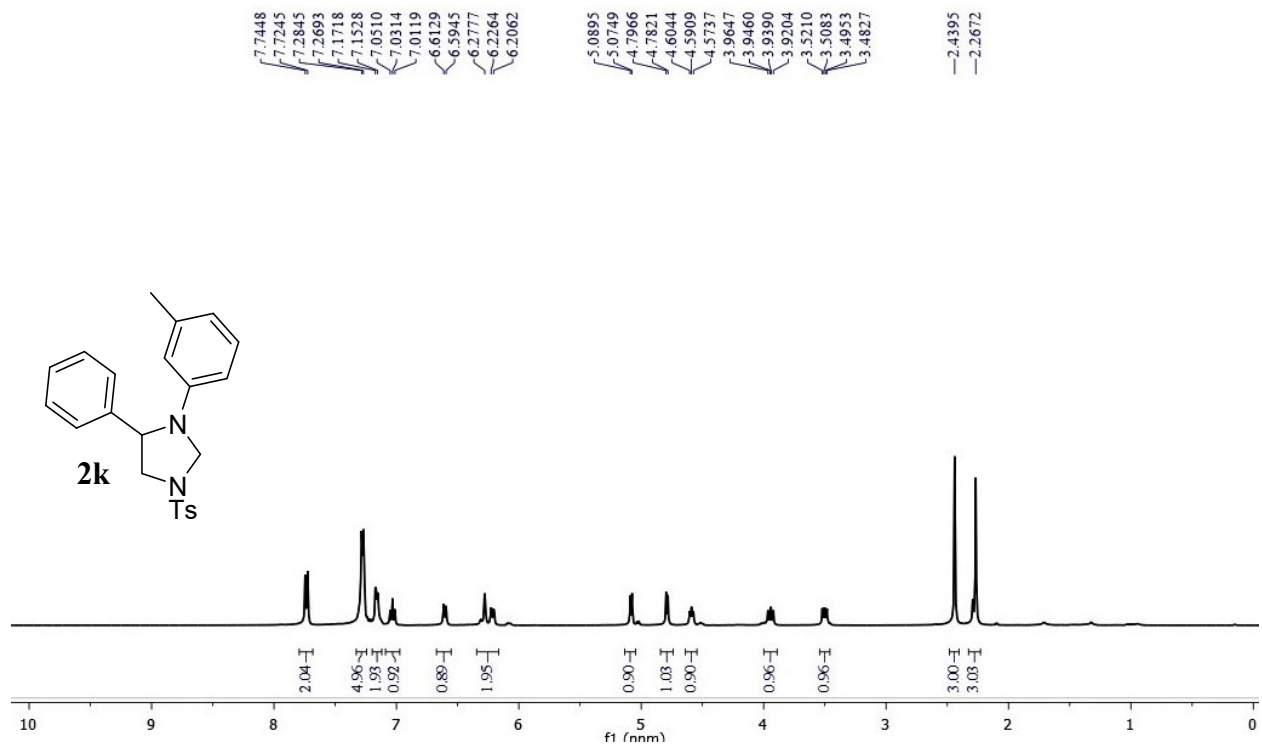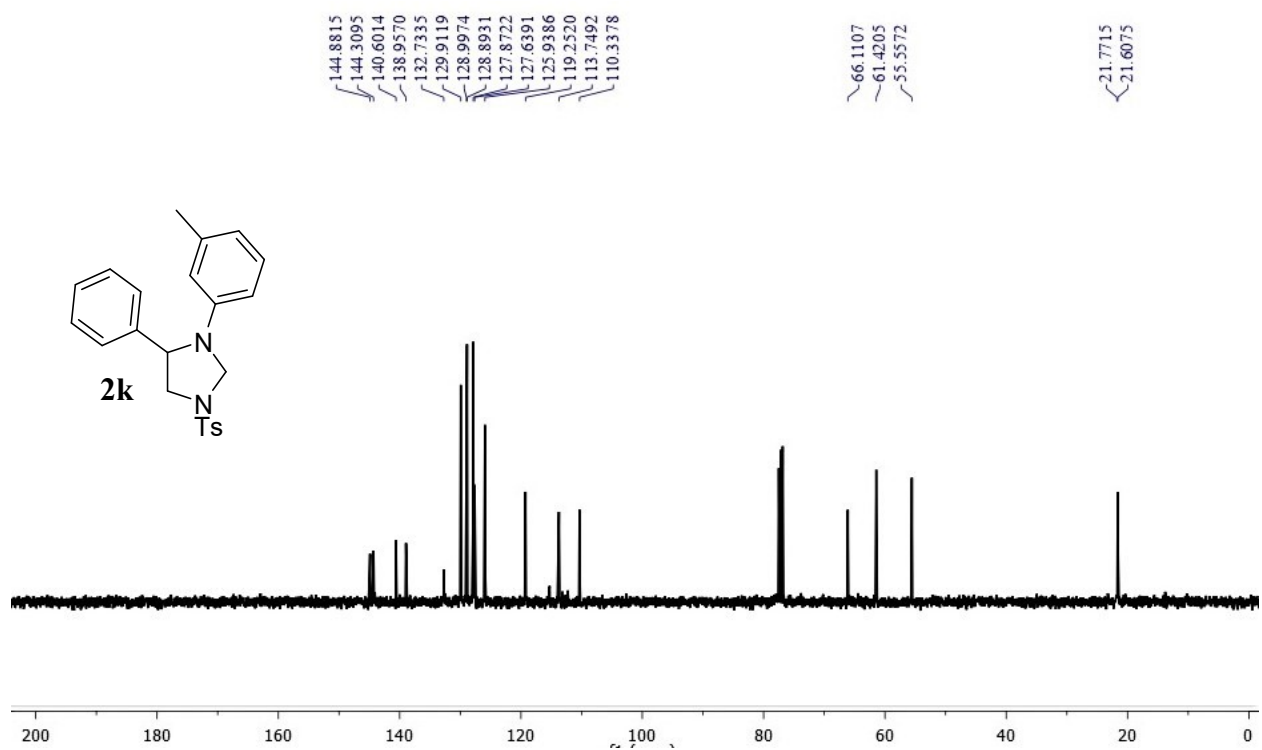



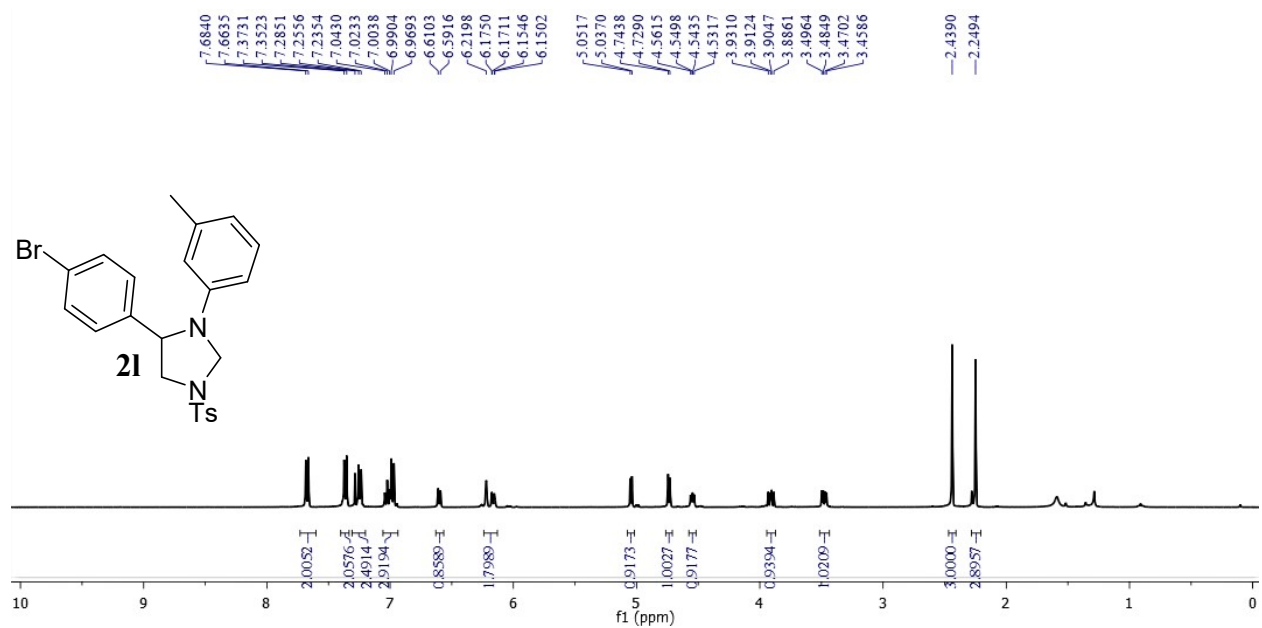

Figure S44. <sup>1</sup>H NMR of **21** (400 MHz, CDCl<sub>3</sub>)

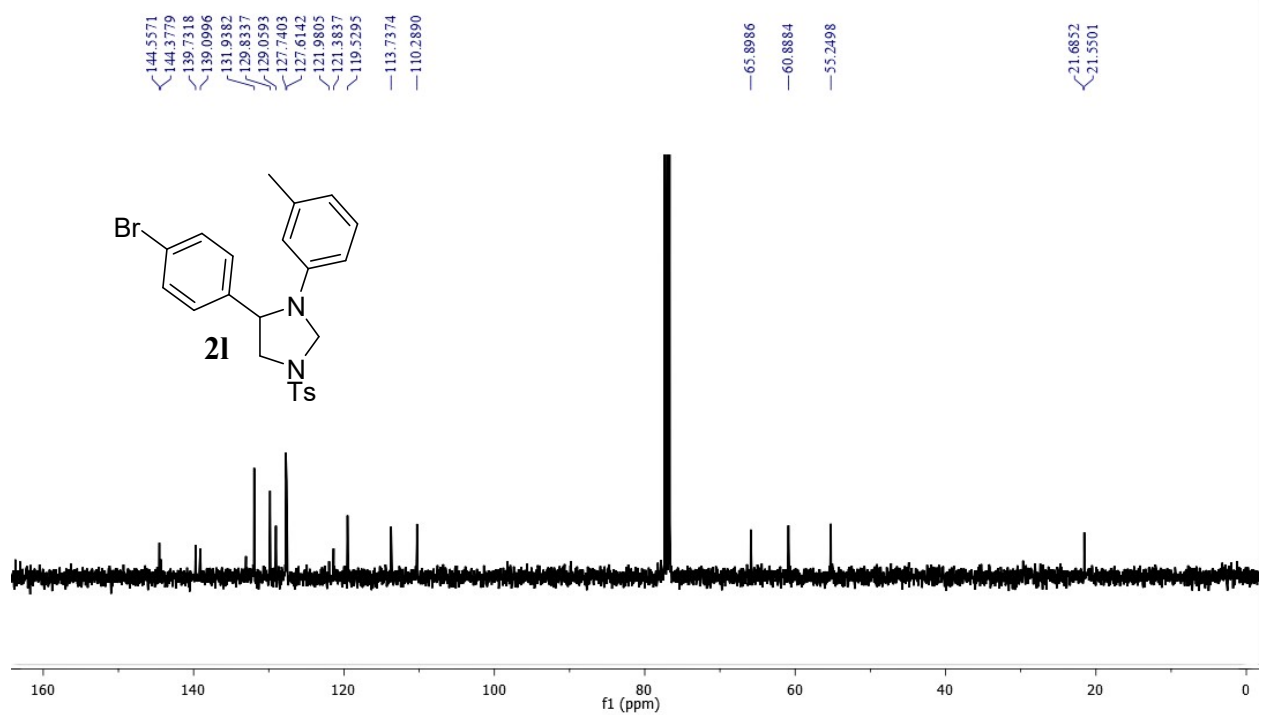

Figure S45. <sup>13</sup>C{<sup>1</sup>H} NMR of **21** (100 MHz, CDCl<sub>3</sub>)

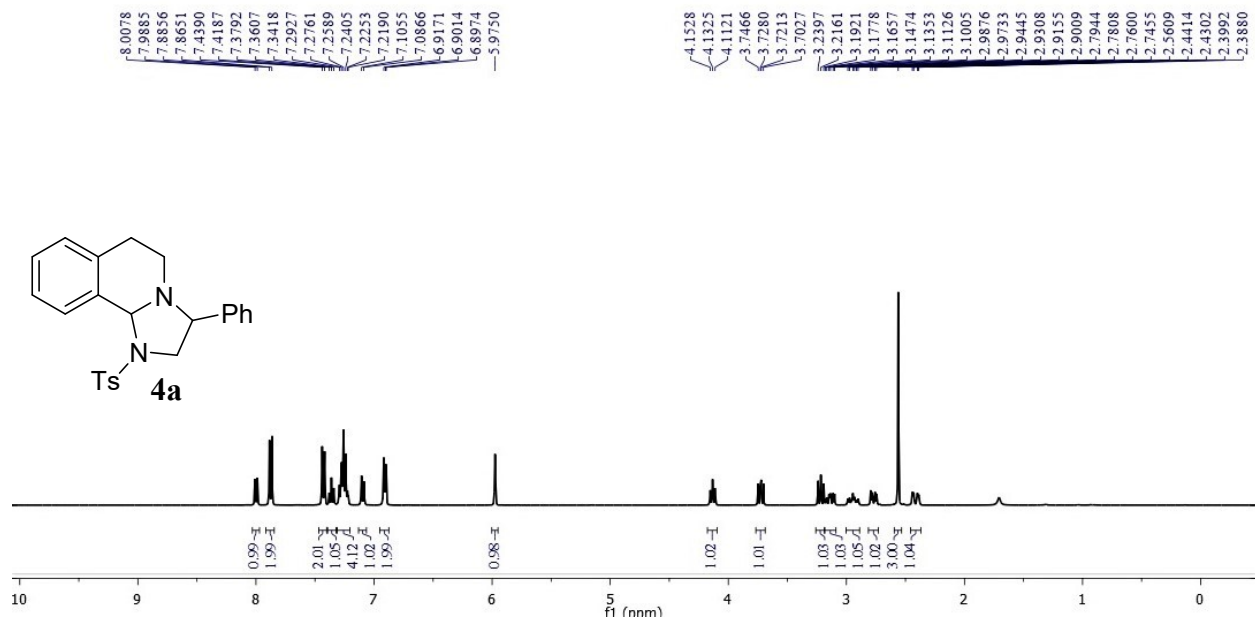

Figure S46. <sup>1</sup>H NMR of **4a** (400 MHz, CDCl<sub>3</sub>)

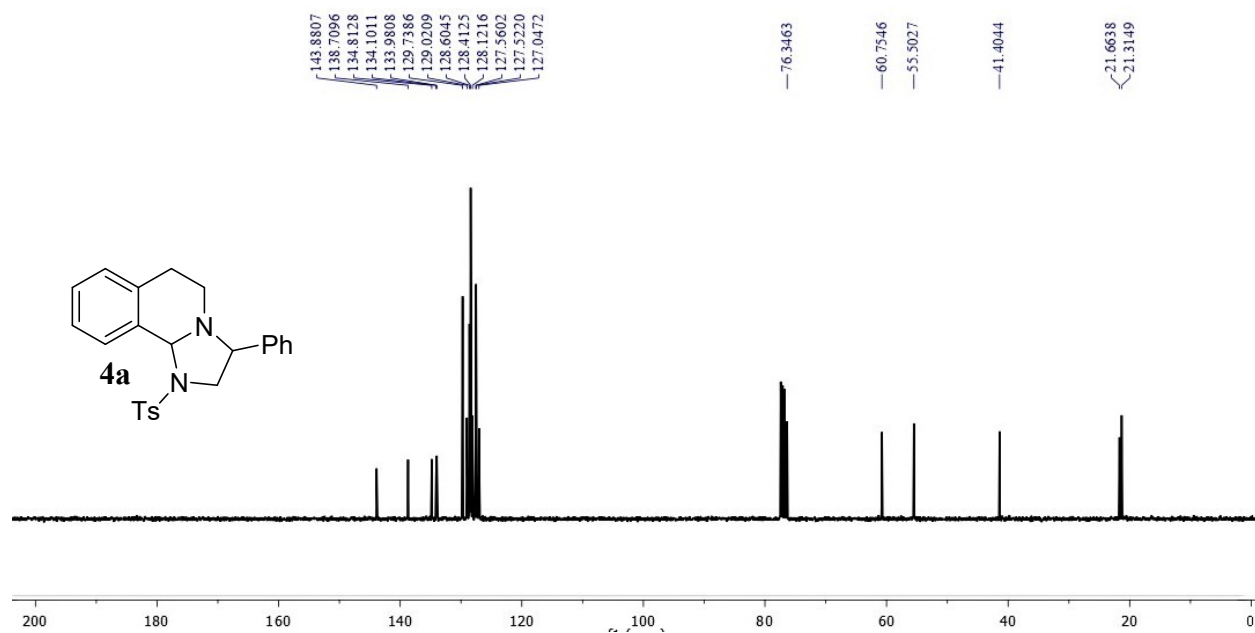

Figure S47. <sup>13</sup>C{<sup>1</sup>H} NMR of **4a** (100 MHz, CDCl<sub>3</sub>)

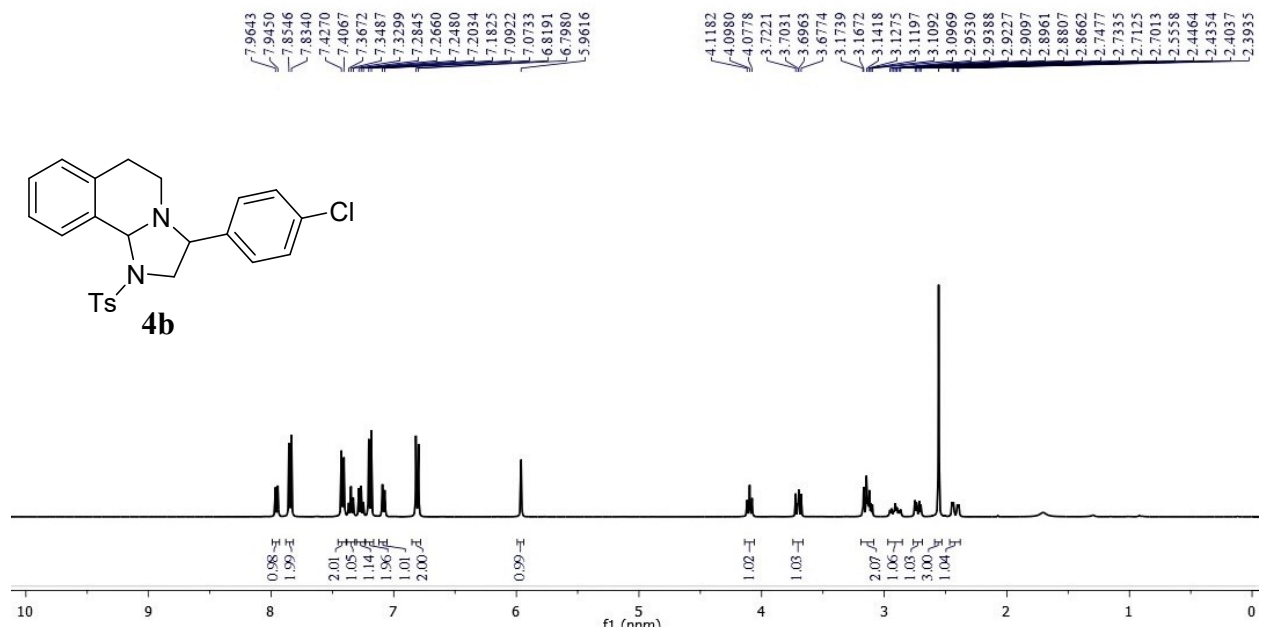

Figure S48. <sup>1</sup>H NMR of **4b** (400 MHz, CDCl<sub>3</sub>)

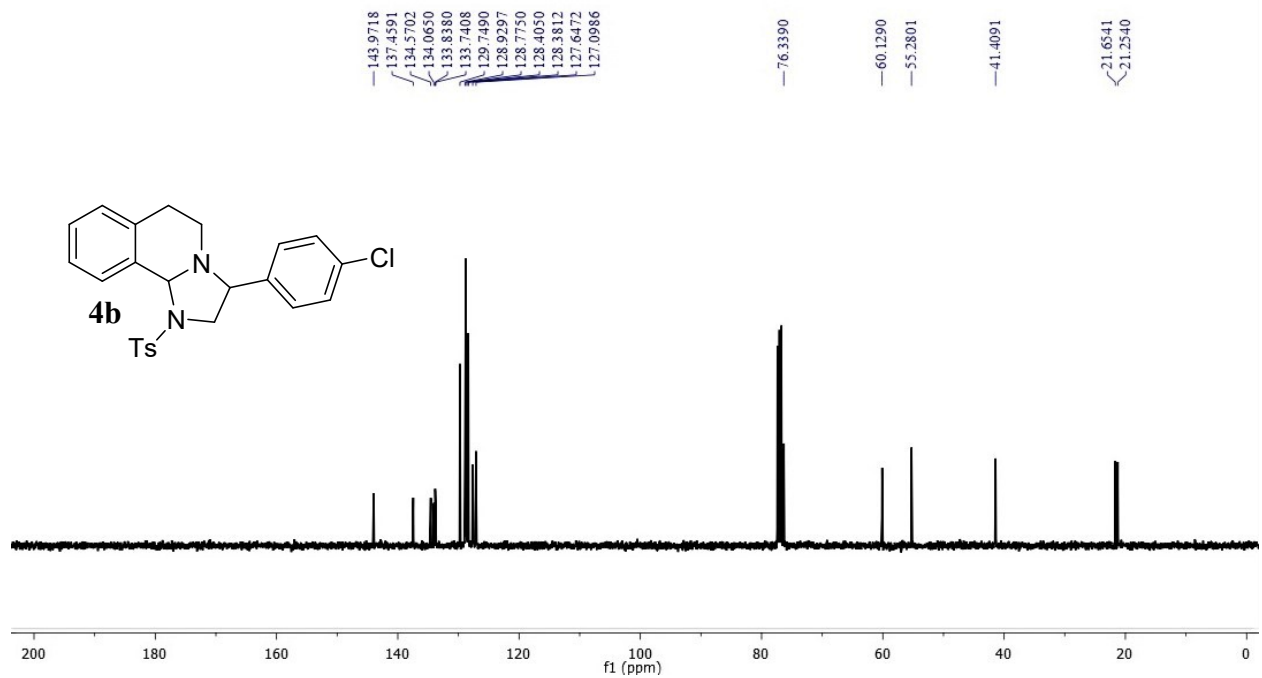

Figure S49. <sup>13</sup>C{<sup>1</sup>H} NMR of **4b** (100 MHz, CDCl<sub>3</sub>)

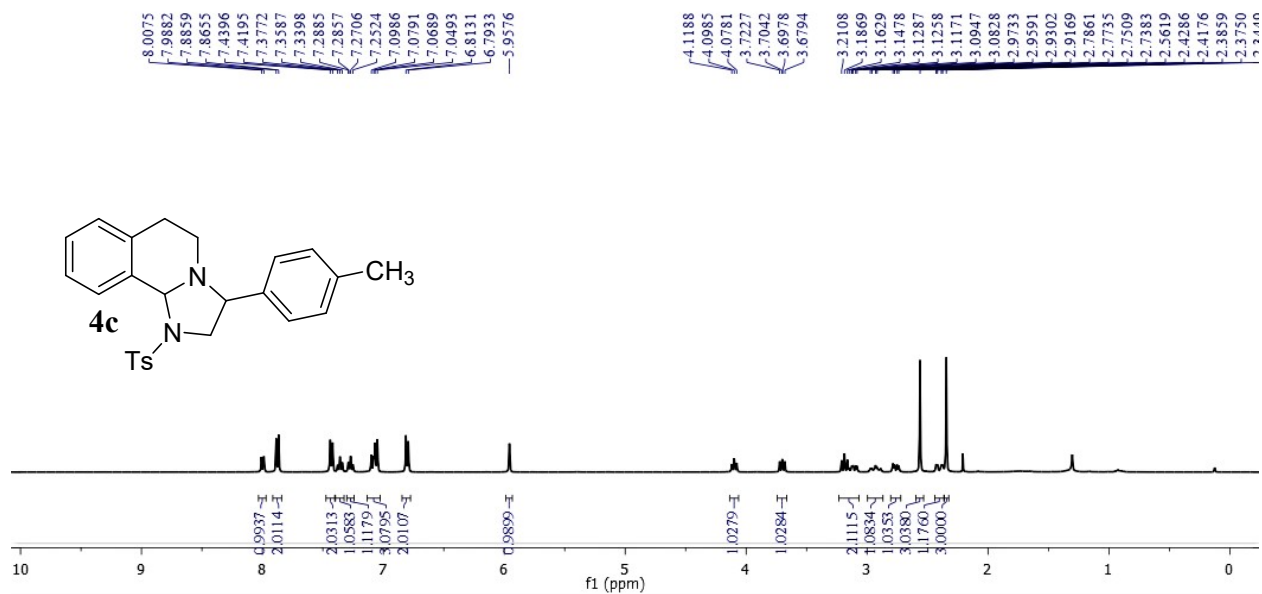

Figure S50. <sup>1</sup>H NMR of **4c** (400 MHz, CDCl<sub>3</sub>)

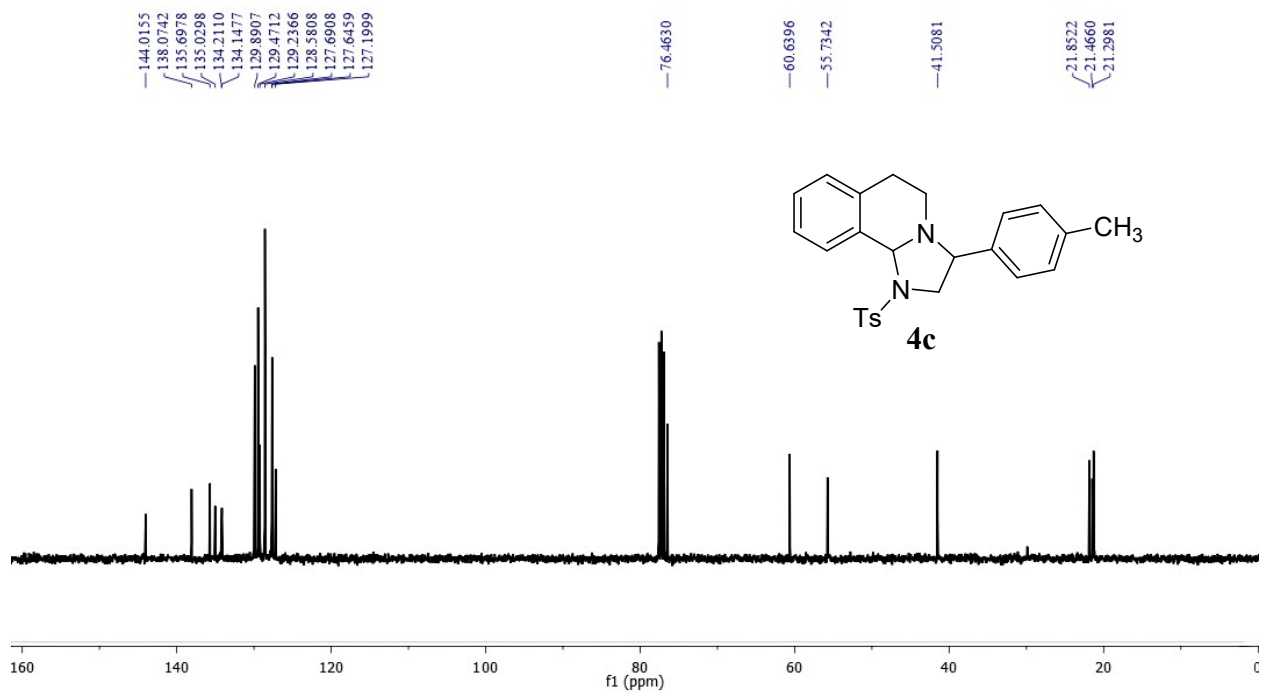

Figure S51. <sup>13</sup>C{<sup>1</sup>H} NMR of **4c** (100 MHz, CDCl<sub>3</sub>)

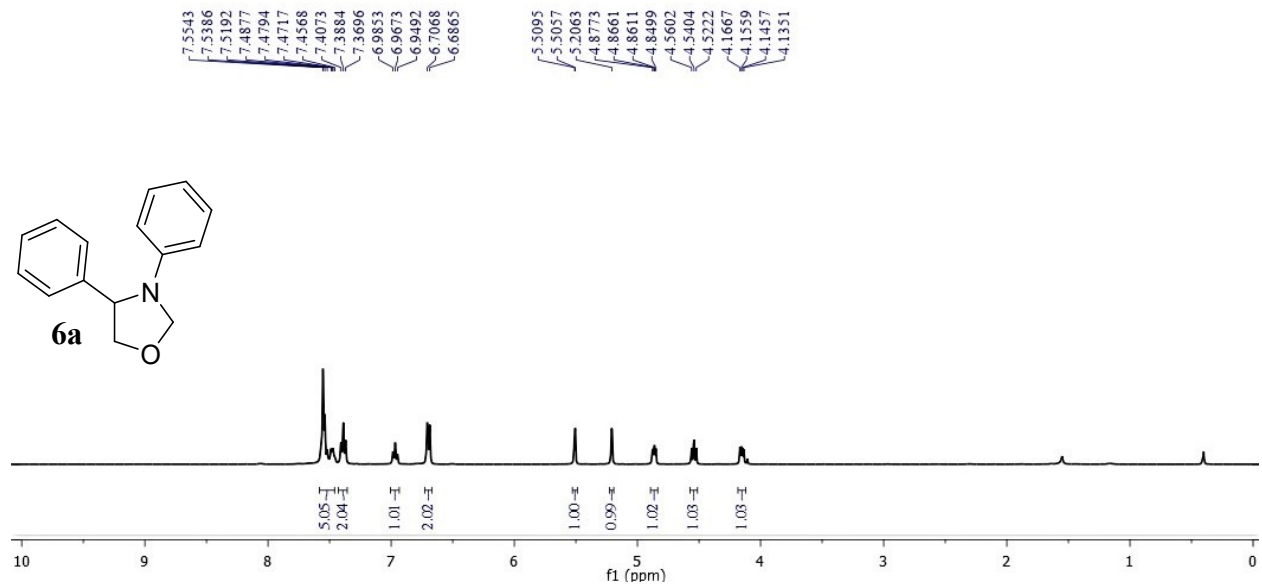

**Figure S52.** <sup>1</sup>H NMR of **6a** (400 MHz, CDCl<sub>3</sub>)

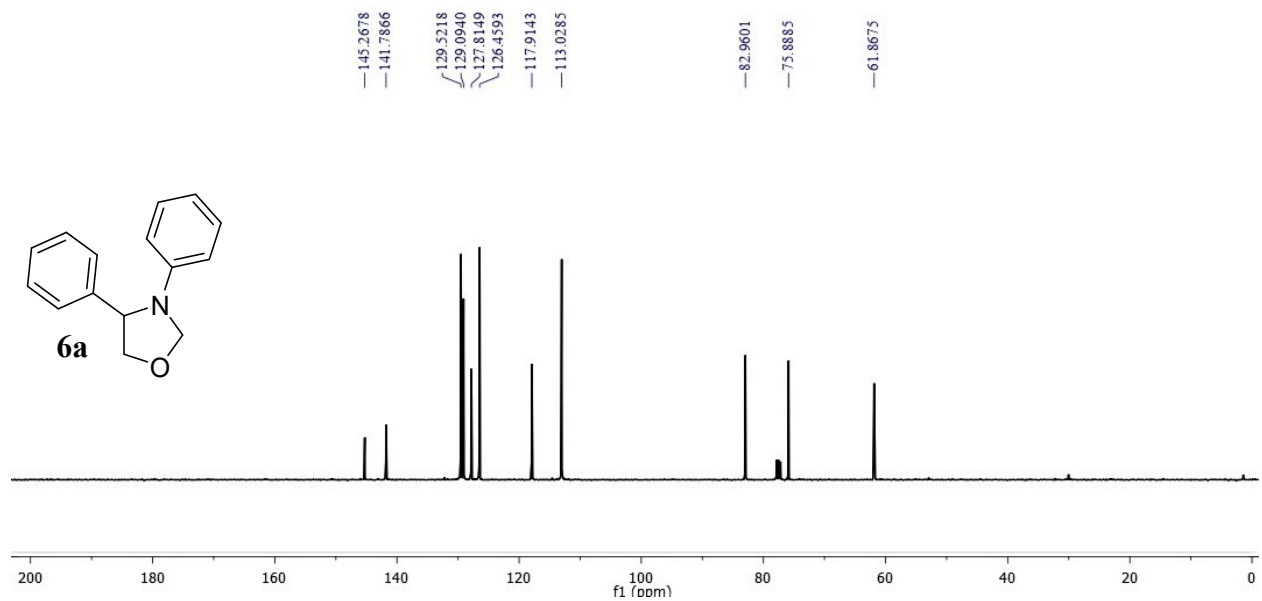

**Figure S53.** <sup>13</sup>C {<sup>1</sup>H} NMR of **6a** (100 MHz, CDCl<sub>3</sub>)

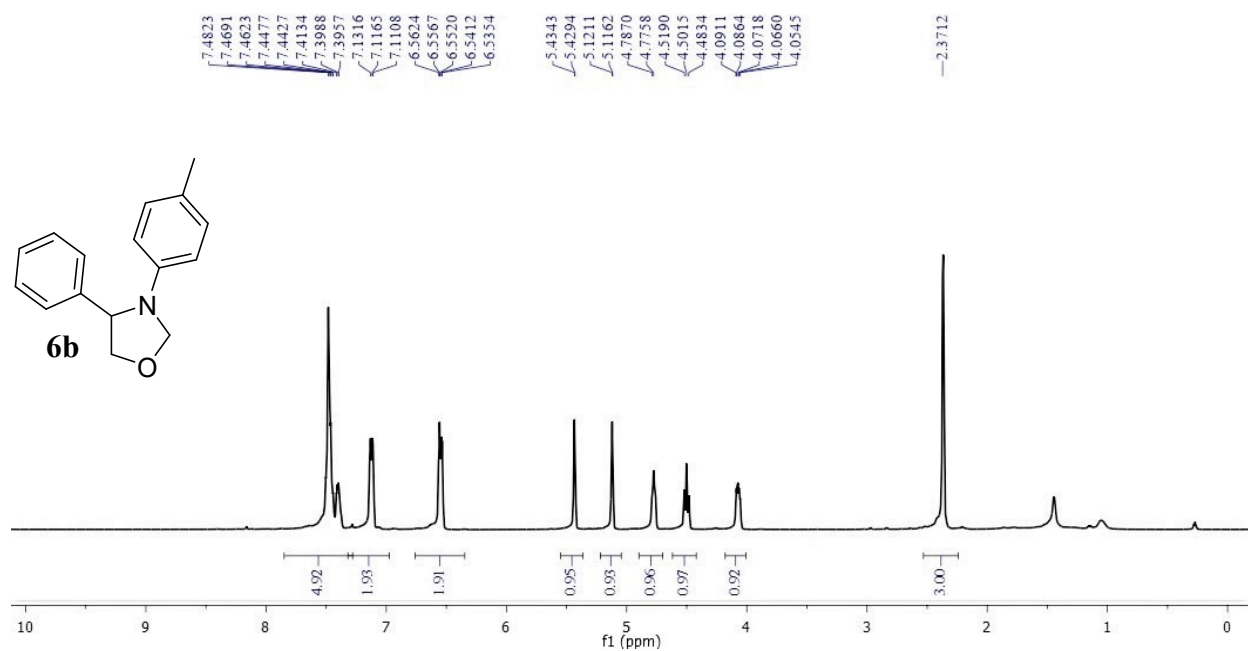

Figure S54. <sup>1</sup>H NMR of **6b** (400 MHz, CDCl<sub>3</sub>)

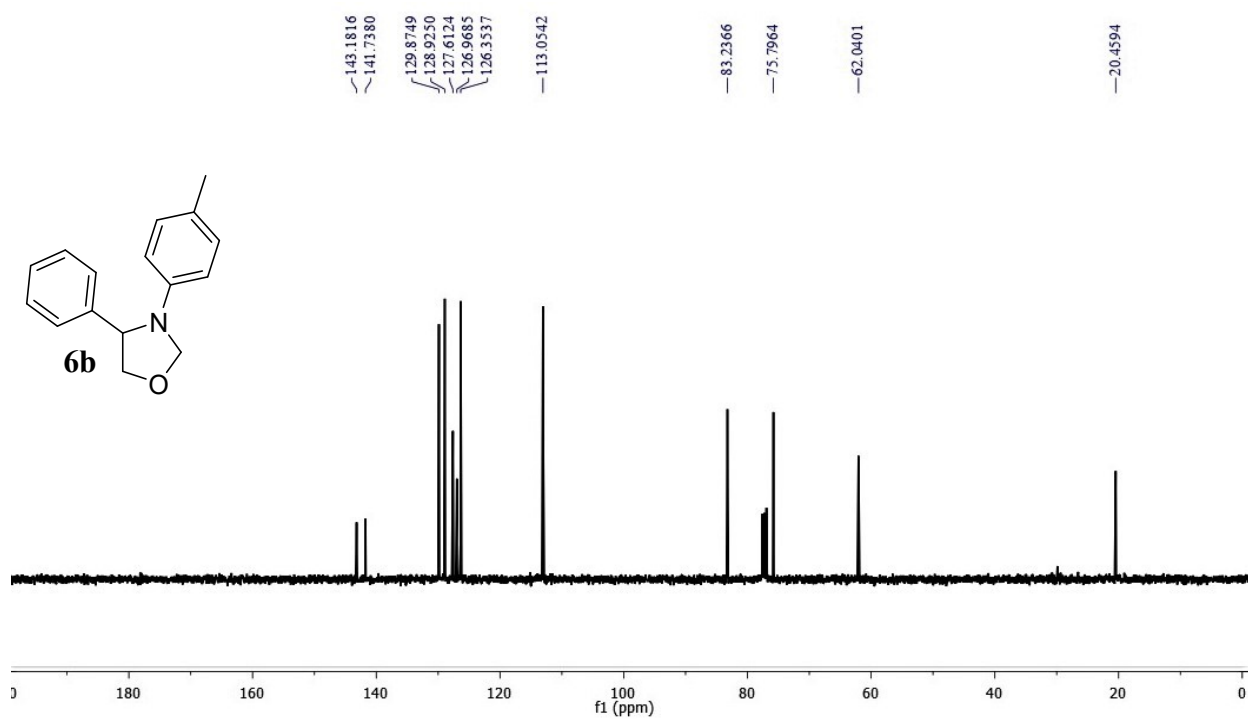

Figure S55. <sup>13</sup>C{<sup>1</sup>H} NMR of **6b** (100 MHz, CDCl<sub>3</sub>)

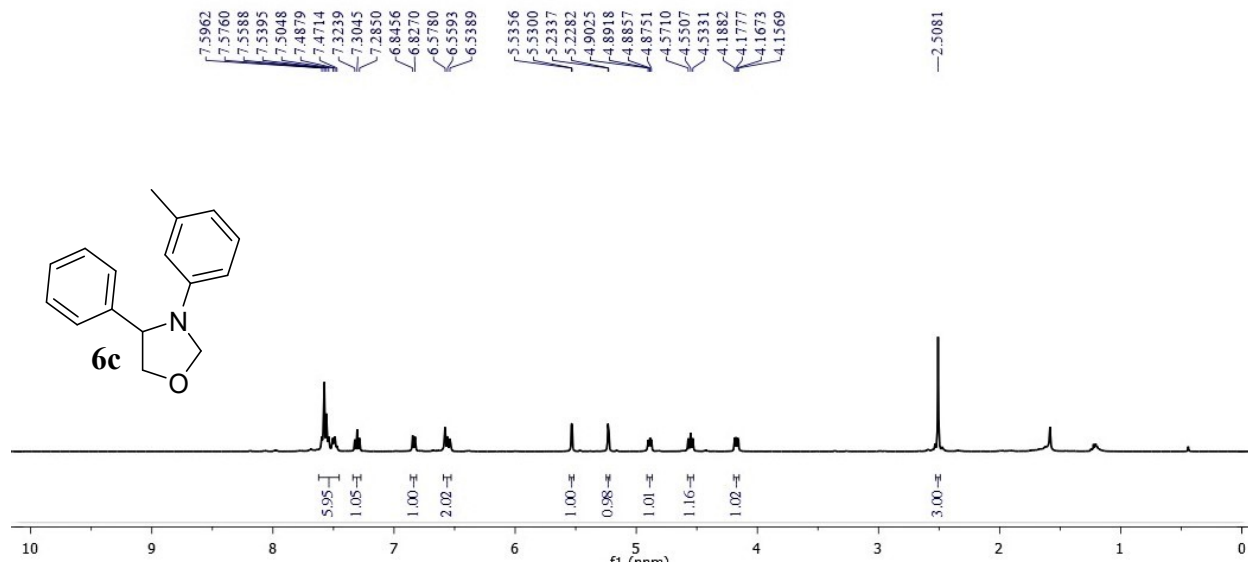

**Figure S56.**  $^1\text{H NMR}$  of **6c** (400 MHz,  $\text{CDCl}_3$ )

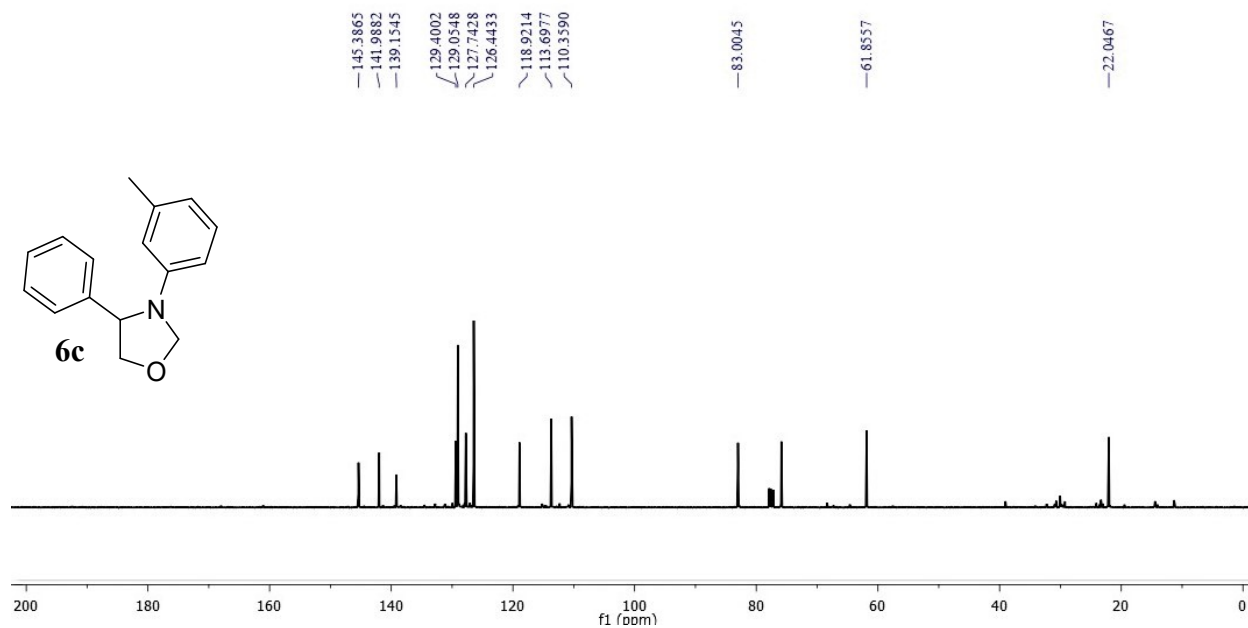

**Figure S57.**  $^{13}\text{C}\{^1\text{H}\}$  NMR of **6c** (100 MHz,  $\text{CDCl}_3$ )

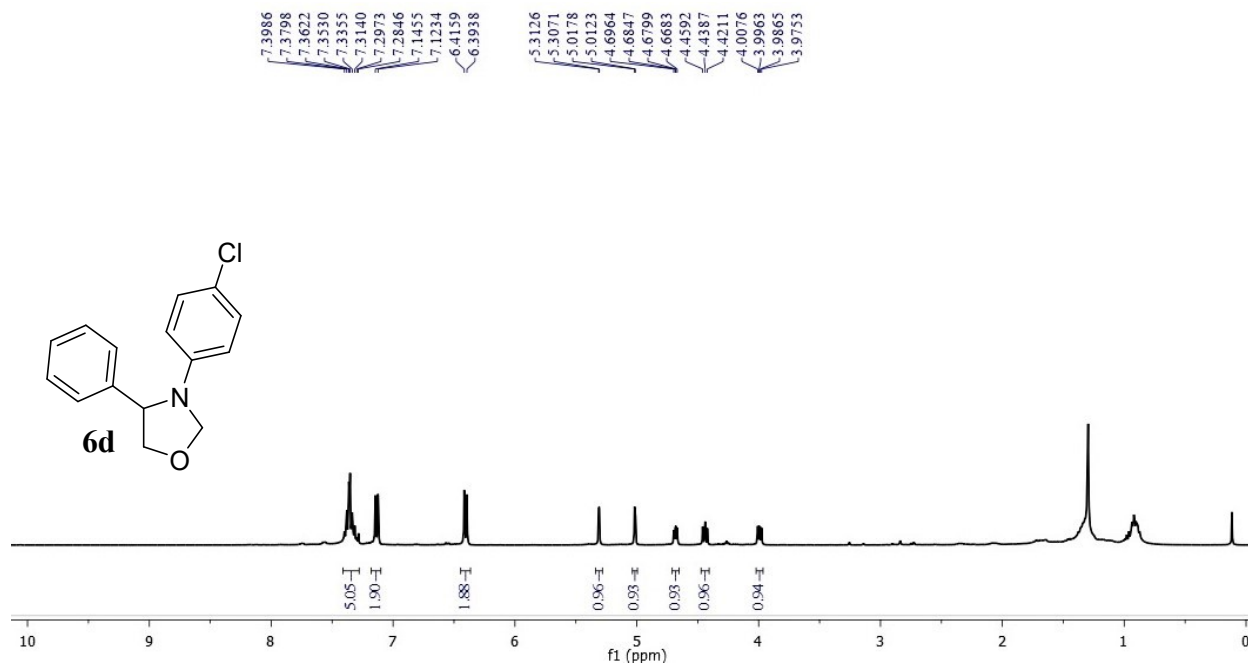

Figure S58. <sup>1</sup>H NMR of **6d** (400 MHz, CDCl<sub>3</sub>)

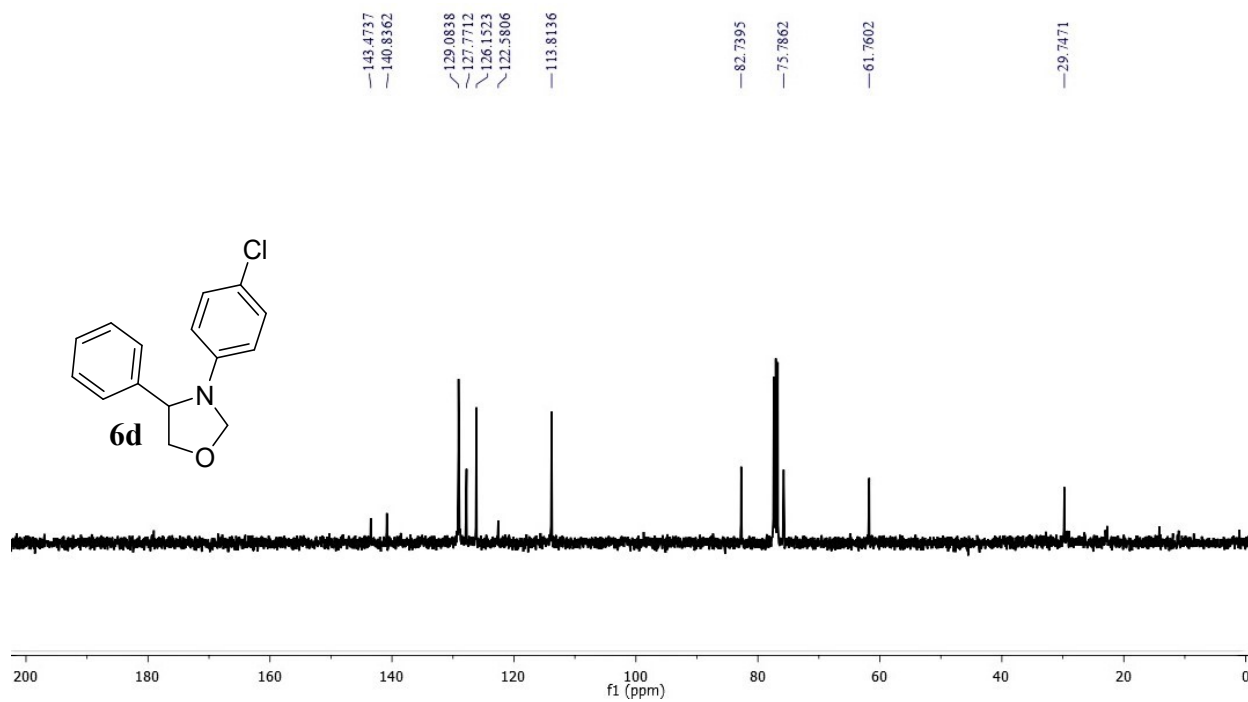

Figure S59. <sup>13</sup>C{<sup>1</sup>H} NMR of **6d** (100 MHz, CDCl<sub>3</sub>)



## 22. Single Crystal Data of 2j:

|                                             |                           |
|---------------------------------------------|---------------------------|
| Compound reference                          | <b>2j</b>                 |
| Chemical formula                            | $C_{22}H_{20}Cl_2N_2O_2S$ |
| Chemical formula weight                     | 447.36                    |
| Crystal system                              | Monoclinic                |
| $a/\text{\AA}$                              | 23.213(5)                 |
| $b/\text{\AA}$                              | 6.0771(2)                 |
| $c/\text{\AA}$                              | 30.525(6)                 |
| $\alpha/^\circ$                             | 90                        |
| $\beta/^\circ$                              | 151.09(5)                 |
| $\gamma/^\circ$                             | 90                        |
| Unit cell volume/ $\text{\AA}^3$            | 2082.0(18)                |
| Temperature/K                               | 293(2)                    |
| Space group                                 | $P2_1/c$                  |
| No. of formula units per unit cell, $Z$     | 4                         |
| No. Of independent reflections              | 6932                      |
| No. of reflections measured                 | 3163                      |
| Cell measurement theta min                  | 70.74                     |
| Cell measurement theta max                  | 3.906                     |
| $R_{int}$                                   | 0.0499                    |
| Final $R_I$ values ( $I > 2\sigma(I)$ )     | 0.0585                    |
| Final $wR(F^2)$ values ( $I > 2\sigma(I)$ ) | 0.1673                    |
| Final $R_I$ values (all data)               | 0.0690                    |
| Final $wR(F^2)$ values (all data)           | 0.1886                    |
| Goodness of fit on $F^2$                    | 1.039                     |
| CCDC depository number                      | 2153616                   |

### 23. References:

- (1) Sengoden, M.; Bhowmick, A.; Punniyamurthy, T. Stereospecific Copper-Catalyzed Domino Ring Opening and Sp<sup>3</sup> C–H Functionalization of Activated Aziridines with N-Alkylanilines. *Org. Lett.* **2017**, *19*, 158–161.
- (2) Vijay, M.; Kumar, S. V.; Satheesh, V.; Ananthappan, P.; Srivastava, H. K.; Ellairaja, S.; Vasantha, V. S.; Punniyamurthy, T. Stereospecific Assembly of Fused Imidazolidines via Tandem Ring Opening/Oxidative Amination of Aziridines with Cyclic Secondary Amines Using Photoredox Catalysis. *Org. Lett.* **2019**, *21*, 7649–7654.
- (3) Satheesh, V.; Vivek Kumar, S.; Punniyamurthy, T. Expedient Stereospecific Co-Catalyzed Tandem C-N and C-O Bond Formation of: N -Methylanilines with Styrene Oxides. *Chem. Commun.* **2018**, *54*, 11813–11816.
- (4) Fujisue, C.; Kadoya, T.; Higashino, T.; Sato, R.; Kawamoto, T.; Mori, T. Air-Stable Ambipolar Organic Transistors Based on Charge-Transfer Complexes Containing Dibenzopyrrolopyrrole. *RSC Adv.* **2016**, *6*, 53345–53350.
- (5) Tang, M. L.; Reichardt, A. D.; Wei, P.; Bao, Z. Correlating Carrier Type with Frontier Molecular Orbital Functionalized Acene Derivatives. *J. Am. Chem. Soc.* **2009**, *131*, 5264–5273.
- (6) Wang, W.; Zhao, N.; Geng, Y.; Cui, S.; Hauser, J.; Decurtins, S.; Liu, S.-X. A Highly Sensitive TTF-Functionalised Probe for the Determination of Physiological Thiols and Its Application in Tumor Cells. *RSC Adv.* **2014**, *4*, 32639–32642.
- (7) Paul, S.; Samanta, A. N-Bromosuccinimide as Bromide Precursor for Direct Synthesis of Stable and Highly Luminescent Green-Emitting Perovskite Nanocrystals. *ACS Energy Lett.* **2020**, *5*, 64–69.
- (8) Pradhan, S.; Bhujel, D.; Gurung, B.; Sharma, D.; Basel, S.; Rasaily, S.; Thapa, S.; Borthakur, S.; Ling, W. L.; Saikia, L.; et al. Stable Lead-Halide Perovskite Quantum Dots as Efficient Visible Light Photocatalysts for Organic Transformations. *Nanoscale Adv.* **2021**, *3*, 1464–1472.
- (9) Luiz, F. C. L.; Garcia, L. S. Fluorescence Studies of Gold ( III ) -Norfloxacin Complexes

- in Aqueous Solutions. *J Fluoresc* **2011**, *21*, 1933–1940.
- (10) Hayyan, M.; Hashim, M. A.; Alnashef, I. M. Superoxide Ion: Generation and Chemical Implications. *Chem. Rev.* **2016**, *116*, 3029–3085.
- (11) Zhang, Y.; Zhang, N.; Tang, Z. R.; Xu, Y. J. Transforming CdS into an Efficient Visible Light Photocatalyst for Selective Oxidation of Saturated Primary C-H Bonds under Ambient Conditions. *Chem. Sci.* **2012**, *3*, 2812–2822.
- (12) Huang, W.; Ma, B. C.; Lu, H.; Li, R.; Wang, L.; Landfester, K.; Zhang, K. A. I. Visible-Light-Promoted Selective Oxidation of Alcohols Using a Covalent Triazine Framework. *ACS Catal.* **2017**, *7*, 5438–5442.
- (13) Ding, X.; Zhao, K.; Zhang, L. Enhanced Photocatalytic Removal of Sodium Pentachlorophenate with Self-Doped Bi<sub>2</sub>WO<sub>6</sub> under Visible Light by Generating More Superoxide Ions. *Environ. Sci. Technol.* **2014**, *48*, 5823–5831.
- (14) Fónagy, O.; Szabó-Bárdos, E.; Horváth, O. 1,4-Benzoquinone and 1,4-Hydroquinone Based Determination of Electron and Superoxide Radical Formed in Heterogeneous Photocatalytic Systems. *J. Photochem. Photobiol. A Chem.* **2021**, *407*, 113057.
- (15) Zhang, M.; Li, Z.; Xin, X.; Zhang, J.; Feng, Y.; Lv, H. Selective Valorization of 5-Hydroxymethylfurfural to 2,5-Diformylfuran Using Atmospheric O<sub>2</sub> and MAPbBr<sub>3</sub> Perovskite under Visible Light. *ACS Catal.* **2020**, *10*, 14793–14800.
- (16) Zhao, Y.; Truhlar, D. G. The M06 Suite of Density Functionals for Main Group Thermochemistry, Thermochemical Kinetics, Noncovalent Interactions, Excited States, and Transition Elements: Two New Functionals and Systematic Testing of Four M06-Class Functionals and 12 Other Function. *Theor. Chem. Acc.* **2008**, *120*, 215–241.
- (17) Zhao, Y.; Truhlar, D. G. The M06 Suite of Density Functionals for Main Group Thermochemistry, Thermochemical Kinetics, Noncovalent Interactions, Excited States, and Transition Elements: Two New Functionals and Systematic Testing of Four M06-Class Functionals and 12 Other Function. *Theor. Chem. Acc.* **2008**, *120*, 215–241

- (18) Hatchard, C. G.; Parker, C. A. A New Sensitive Chemical Actinometer - II. Potassium Ferrioxalate as a Standard Chemical Actinometer. *Proc. R. Soc. London. Ser. A. Math. Phys. Sci.* **1956**, *235*, 518–536.
- (19) Cismesia, M. A.; Yoon, T. P. Characterizing Chain Processes in Visible Light Photoredox Catalysis. *Chem. Sci.* **2015**, *6*, 5426–5434.
- (20) Rabani, J.; Mamane, H.; Pousty, D.; Bolton, J. R. Practical Chemical Actinometry—A Review. *Photochem. Photobiol.* **2021**, *97* (5), 873–902.
- (21) Rai, P.; Maji, K.; Maji, B. Photoredox/Cobalt Dual Catalysis for Visible-Light-Mediated Alkene-Alkyne Coupling. *Org. Lett.* **2019**, *21*, 3755–3759.
